# Supplementary material
Source: PubMed Central journal article supplement (PMC3050591)
Supplement: NIHMS263304-supplement-02.pdf [file NIHMS263304-supplement-02.pdf]

## **Supplementary Information**

### **Part 2: Analytical Characterization of Chemical Library**

#### **A pairwise chemical genetic screen identifies new inhibitors of glucose transport**

Olesya A. Ulanovskaya<sup>1</sup>, Jiayue Cui<sup>1</sup>, Stephen J. Kron<sup>2</sup> and Sergey A. Kozmin<sup>1\*</sup>

<sup>1</sup>Department of Chemistry, University of Chicago, Chicago, IL 60637

<sup>2</sup>Department of Molecular Genetics and Cell Biology, University of Chicago, Chicago, IL 60637

\*Correspondence should be addressed to S.A.K. ([skozmin@uchicago.edu](mailto:skozmin@uchicago.edu))

# Pyrrolidinone Based Library, Plate 1

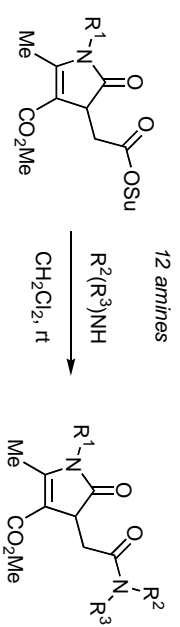

|          | 1   | 2   | 3   | 4   | 5   | 6   | 7   | 8   | 9 | 10  | 11  | 12 |
|----------|-----|-----|-----|-----|-----|-----|-----|-----|---|-----|-----|----|
| <b>A</b> |     | 44% | 54% |     |     |     |     |     |   |     |     |    |
| <b>B</b> |     |     |     | 47% |     |     |     |     |   | 70% |     |    |
| <b>C</b> | 91% |     |     |     |     | 71% |     |     |   |     |     |    |
| <b>D</b> |     |     |     |     |     |     | 66% |     |   |     |     |    |
| <b>E</b> |     |     |     |     |     |     |     | 70% |   |     |     |    |
| <b>F</b> |     |     |     |     |     |     |     |     |   |     | 68% |    |
| <b>G</b> |     |     |     |     |     |     |     |     |   |     | 58% |    |
| <b>H</b> |     |     |     |     | 91% |     |     | 64% |   |     |     |    |

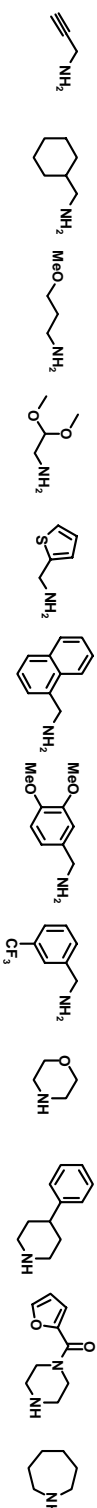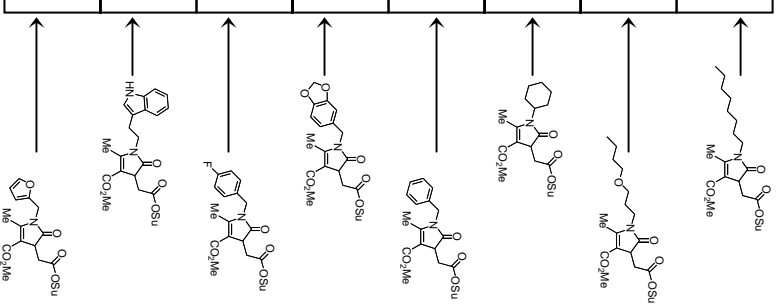

**Pyrrolidinone Based Library, Plate 1**

**A1 - A12**

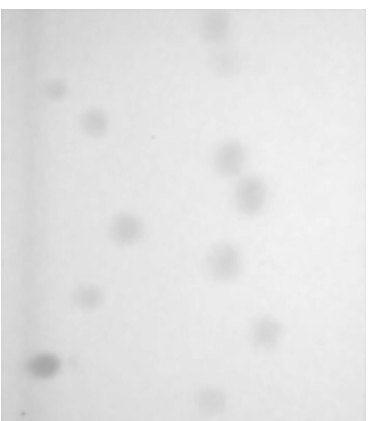

**B1 - B12**

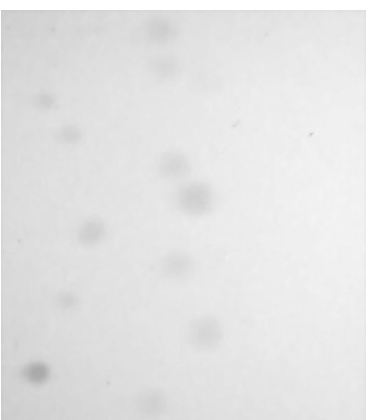

**C1 - C12**

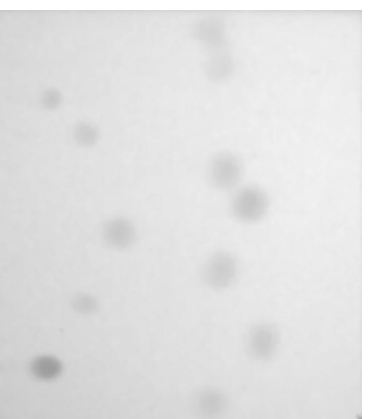

**D1 - D12**

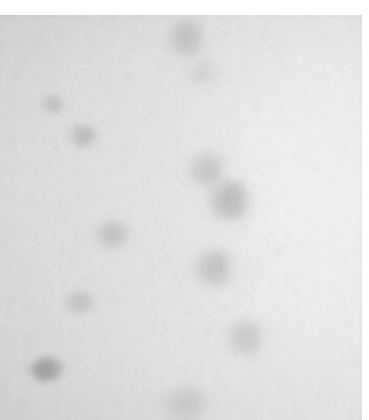

**E1 - E12**

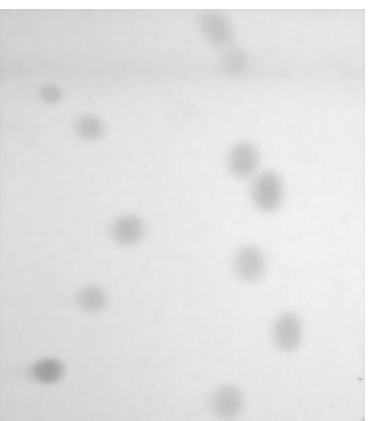

**F1 - F12**

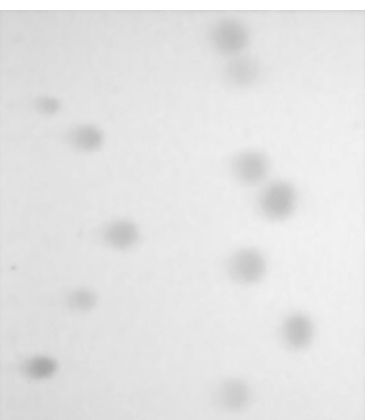

**G1 - G12**

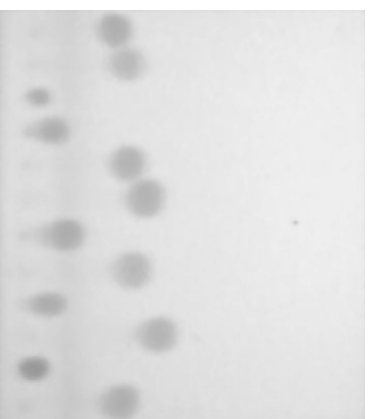

**H1 - H12**

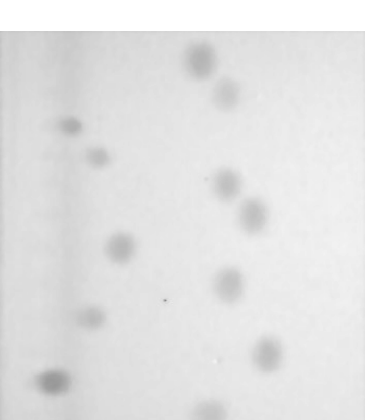

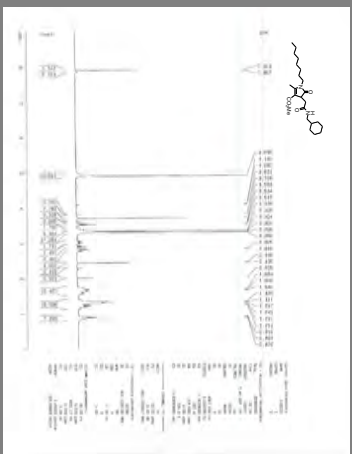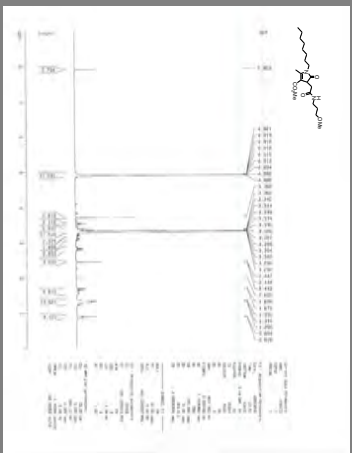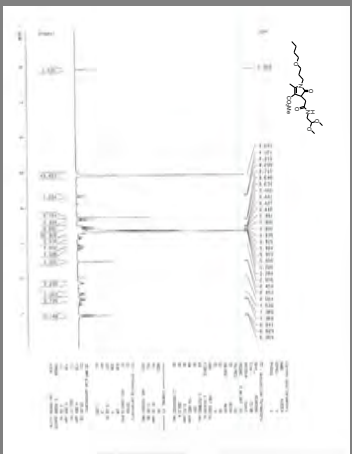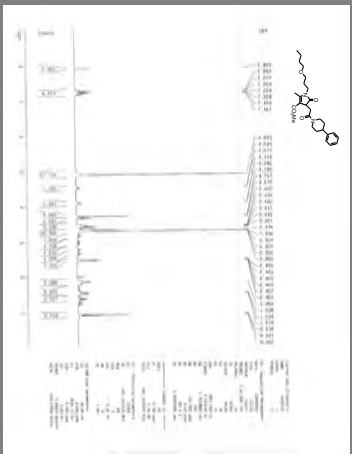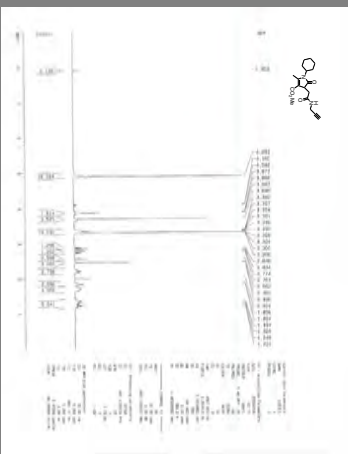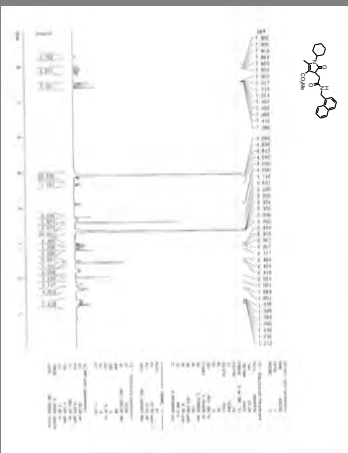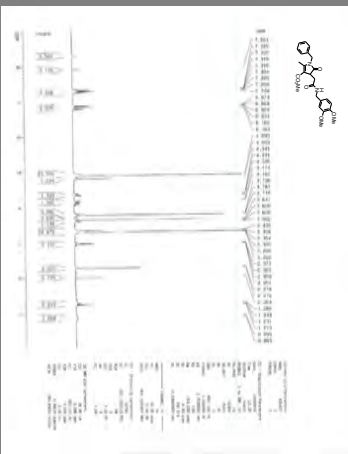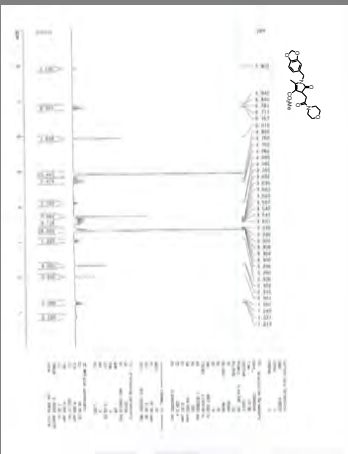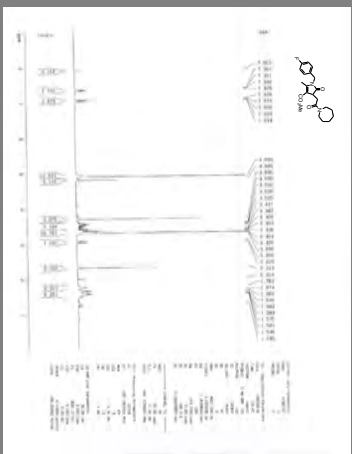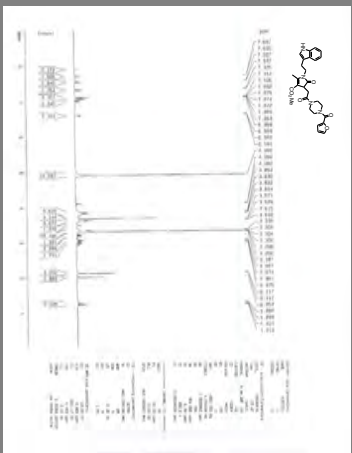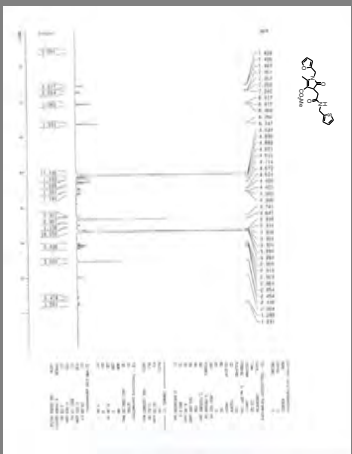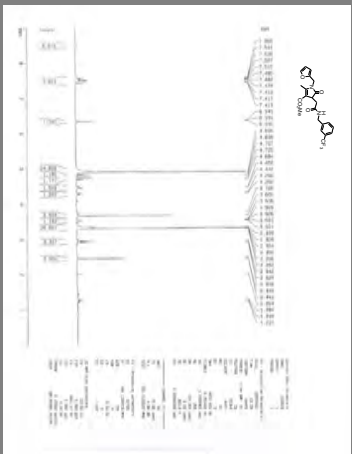

# Pyrrolidinone Based Library, Plate 2

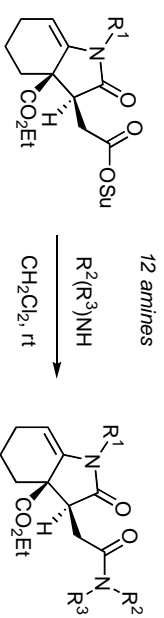

|          | 1   | 2   | 3   | 4   | 5   | 6   | 7   | 8   | 9   | 10 | 11  | 12  |
|----------|-----|-----|-----|-----|-----|-----|-----|-----|-----|----|-----|-----|
| <b>A</b> |     |     |     |     |     |     | 69% |     | 59% |    |     |     |
| <b>B</b> |     |     |     |     | 55% |     |     |     |     |    |     |     |
| <b>C</b> |     | 61% |     |     |     |     |     |     |     |    | 77% |     |
| <b>D</b> |     |     |     |     |     |     |     |     |     |    |     | 81% |
| <b>E</b> | 91% |     |     |     |     | 60% |     |     |     |    |     |     |
| <b>F</b> |     |     |     | 69% |     |     |     | 85% |     |    |     |     |
| <b>G</b> |     |     |     |     |     |     |     |     | 85% |    |     |     |
| <b>H</b> |     |     | 47% |     |     |     |     |     |     |    |     |     |

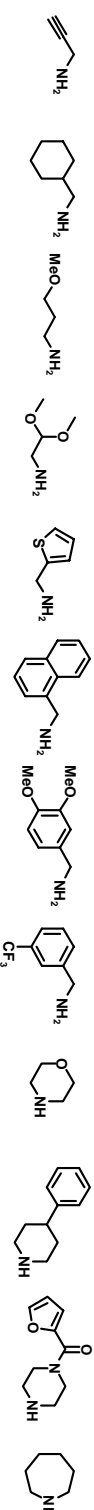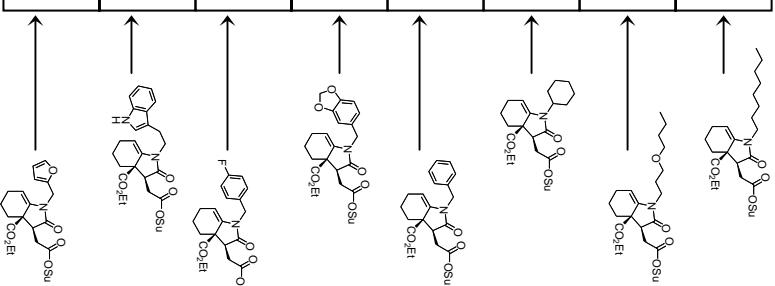

**Pyrrolidinone Based Library, Plate 2**

**A1 - A12**

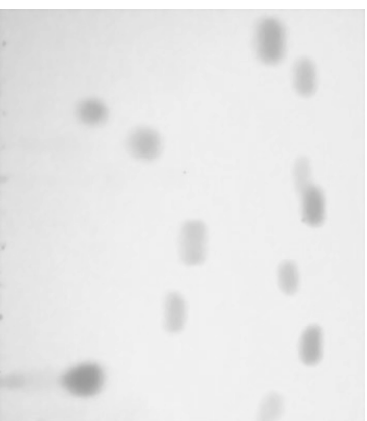

**B1 - B12**

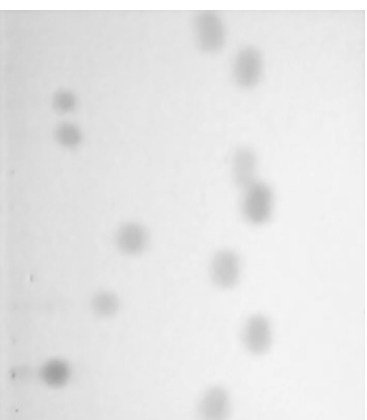

**C1 - C12**

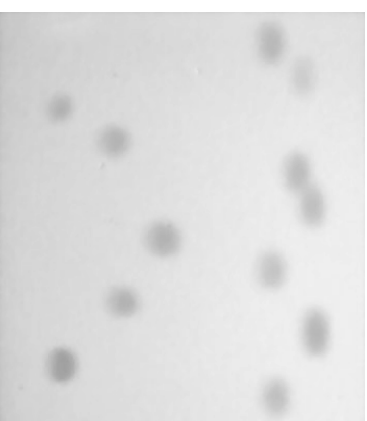

**D1 - D12**

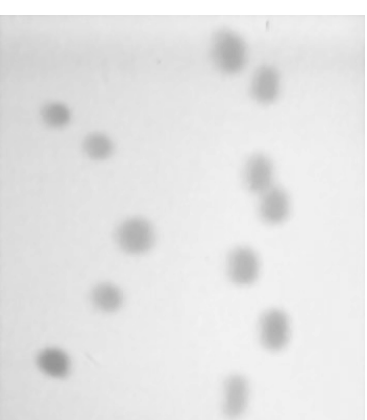

**E1 - E12**

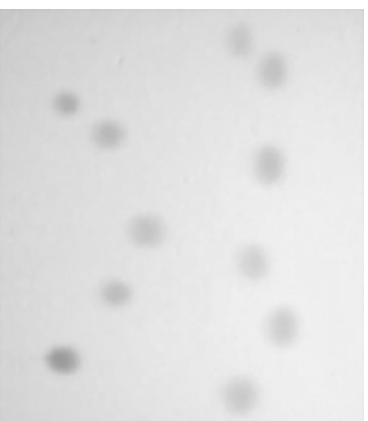

**F1 - F12**

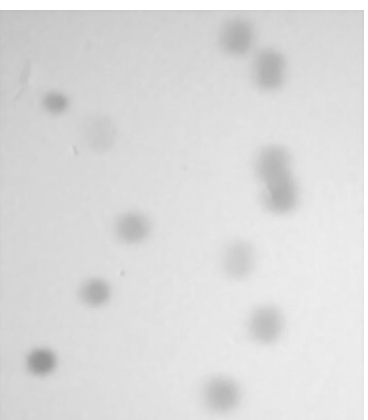

**G1 - G12**

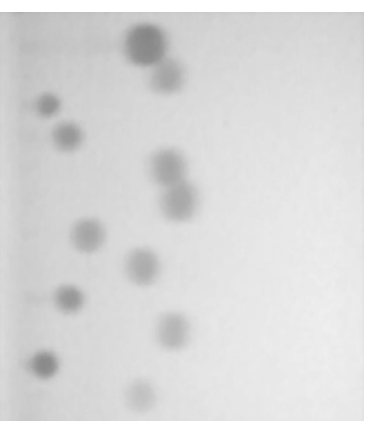

**H1 - H12**

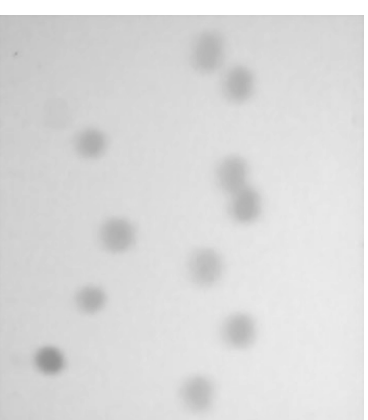

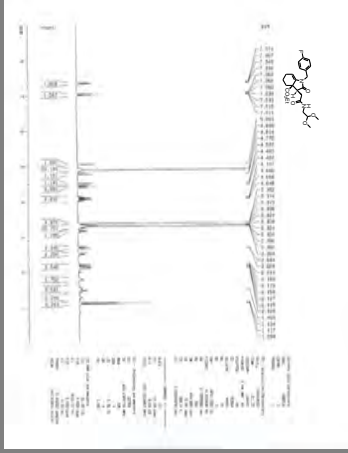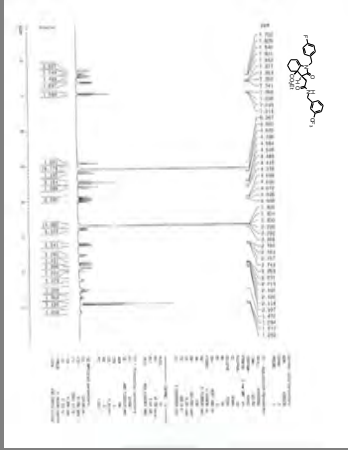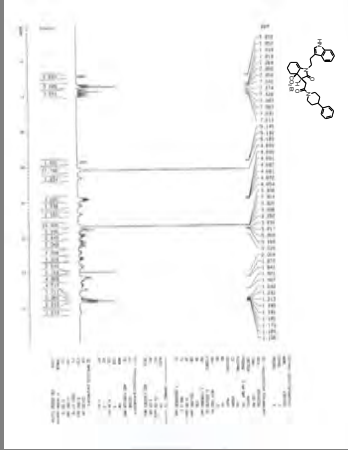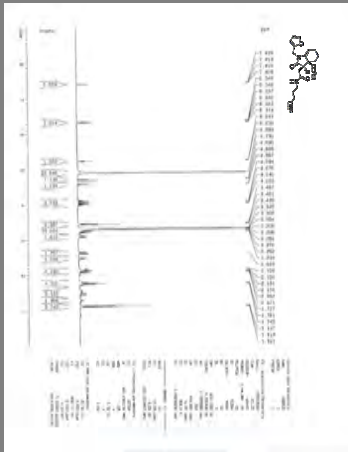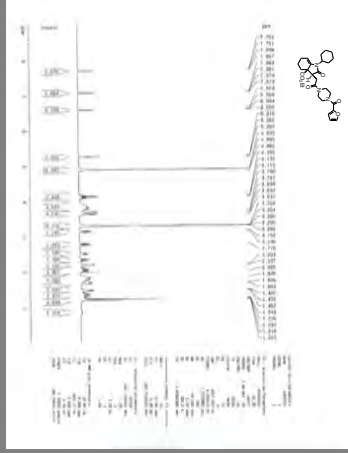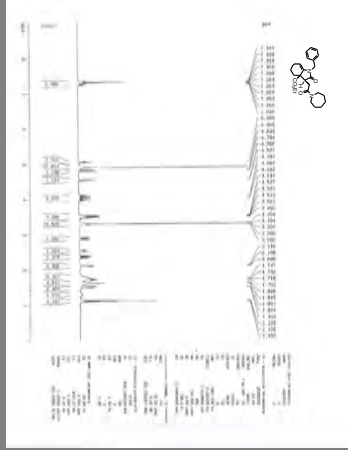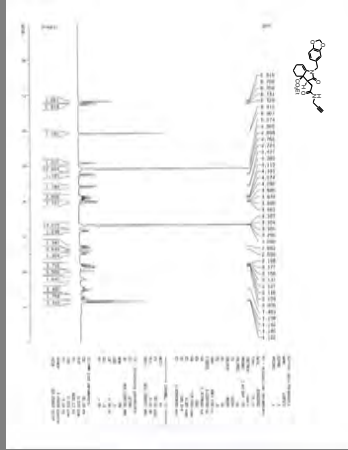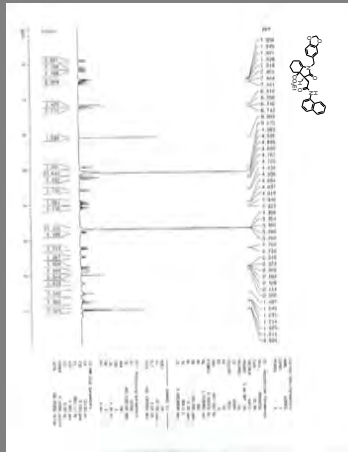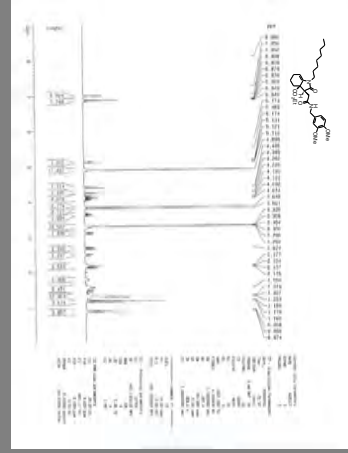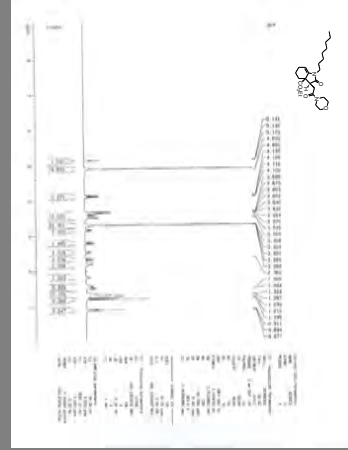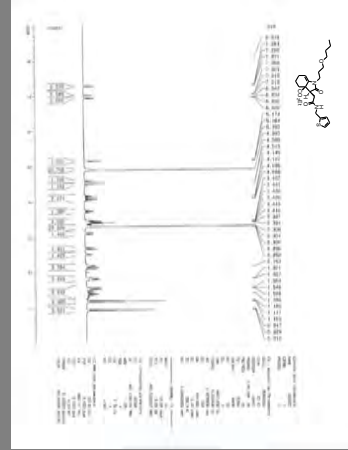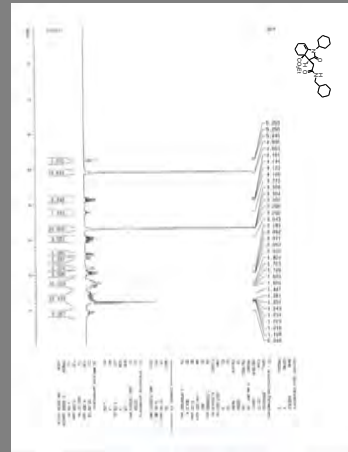

# Pyrrolidinone Based Library, Plate 3

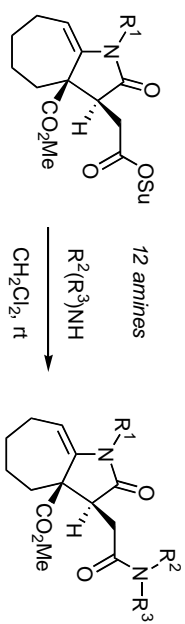

|          | 1   | 2   | 3   | 4   | 5   | 6   | 7   | 8   | 9   | 10 | 11  | 12  |
|----------|-----|-----|-----|-----|-----|-----|-----|-----|-----|----|-----|-----|
| <b>A</b> | 61% |     |     |     |     |     |     |     | 55% |    |     |     |
| <b>B</b> |     |     |     |     | 78% |     |     |     |     |    |     |     |
| <b>C</b> |     | 56% |     |     |     |     |     |     |     |    |     |     |
| <b>D</b> |     |     |     | 68% |     |     |     |     |     |    |     | 84% |
| <b>E</b> |     |     |     |     |     |     |     | 80% |     |    |     |     |
| <b>F</b> |     |     |     |     |     | 68% |     |     |     |    | 65% |     |
| <b>G</b> |     |     | 51% |     |     |     | 76% |     |     |    |     |     |
| <b>H</b> |     |     |     |     |     |     | 87% |     |     |    |     |     |

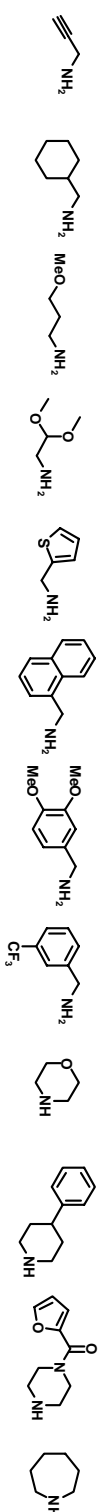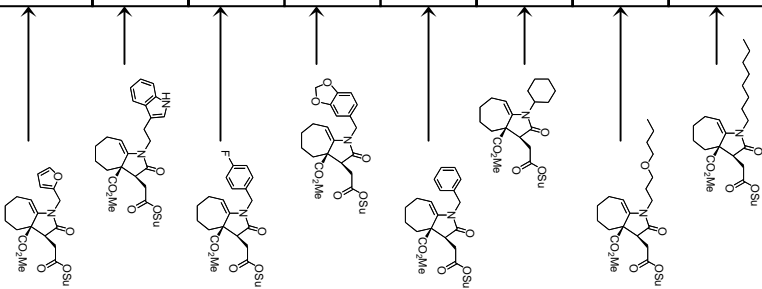



**Pyrrolidinone Based Library, Plate 3**

**A1 - A12**

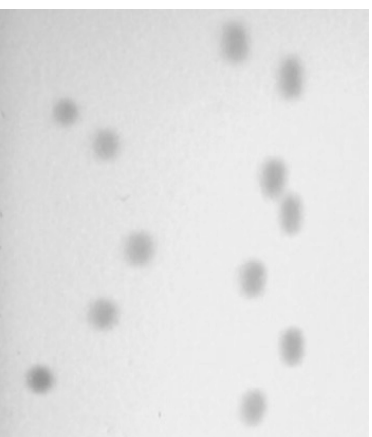

**B1 - B12**

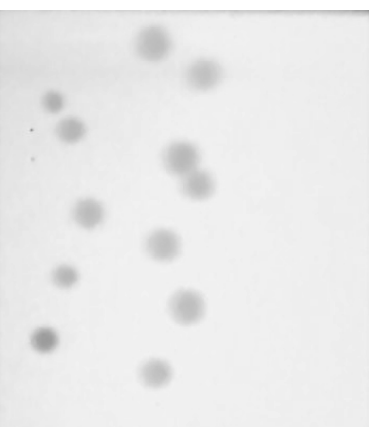

**C1 - C12**

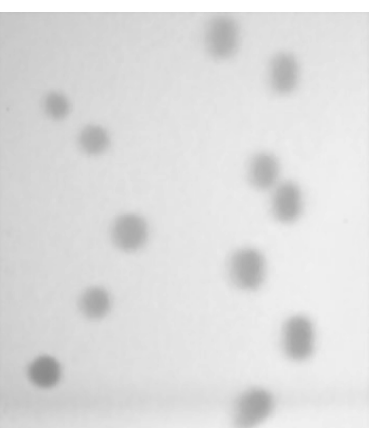

**D1 - D12**

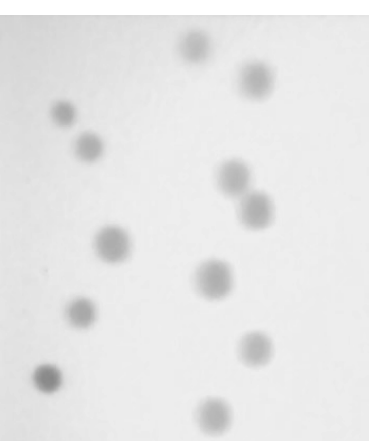

**E1 - E12**

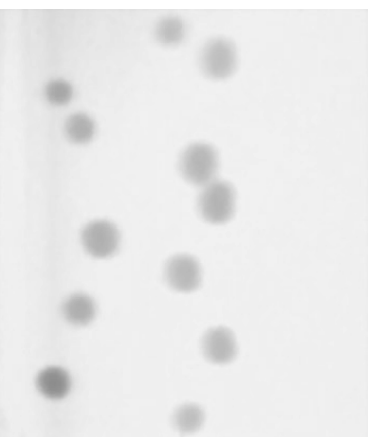

**F1 - F12**

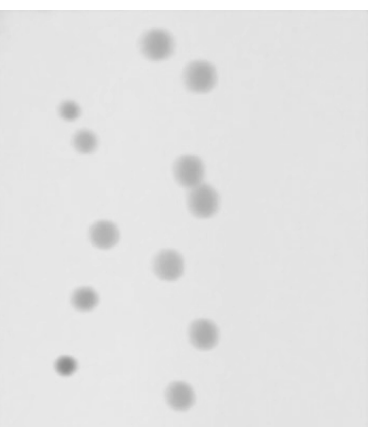

**G1 - G12**

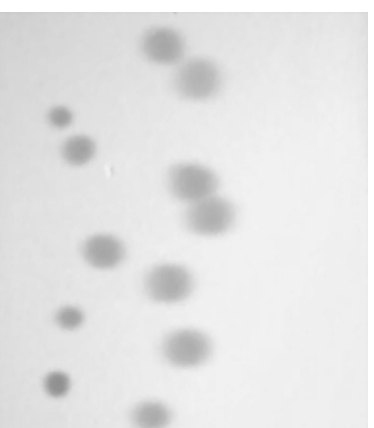

**H1 - H12**

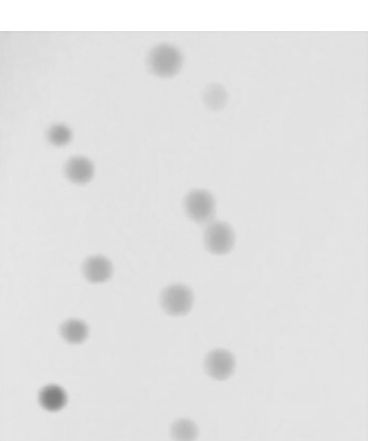

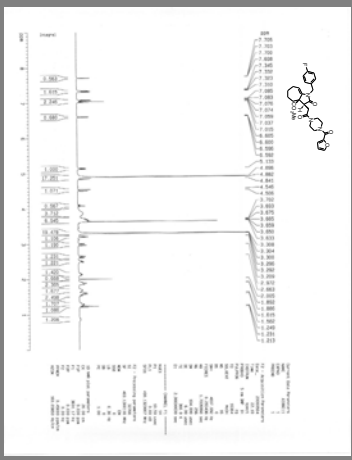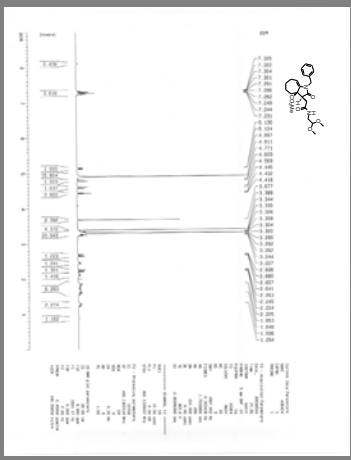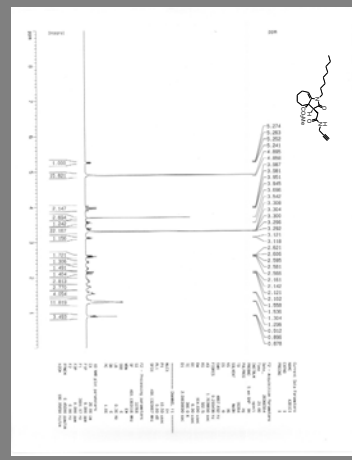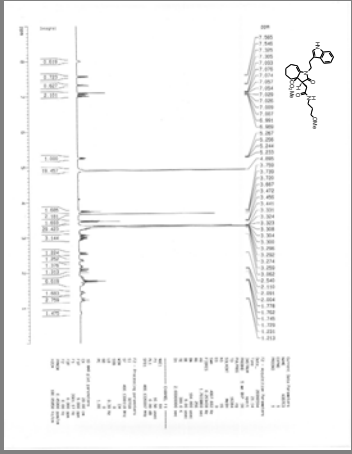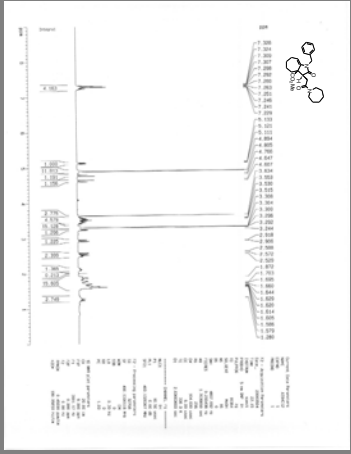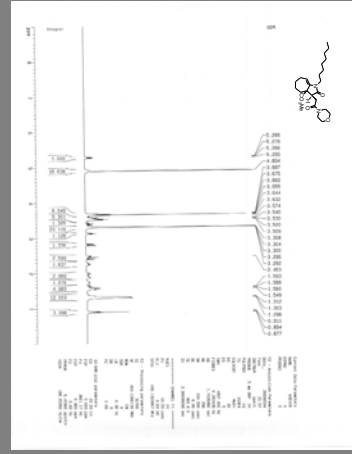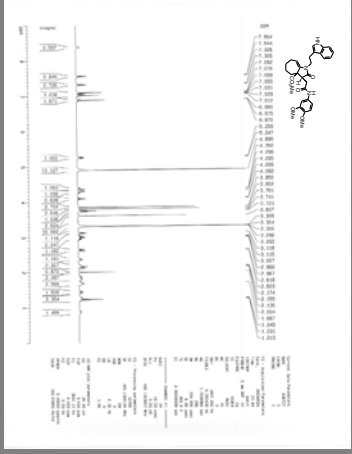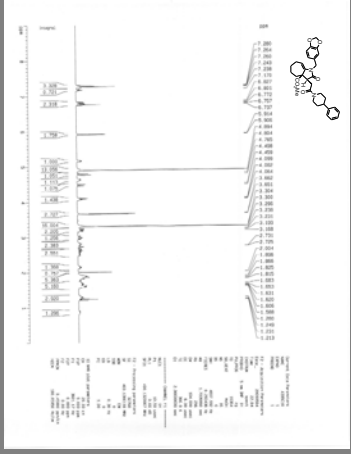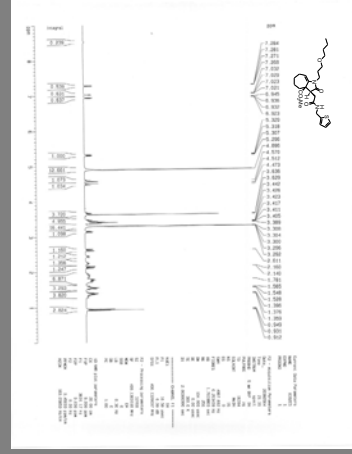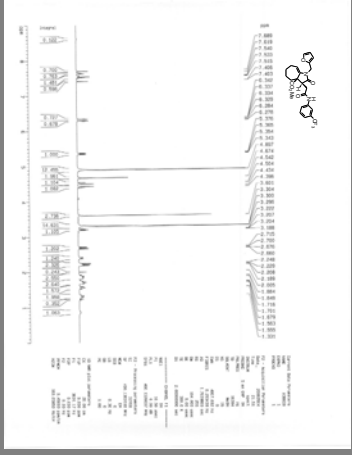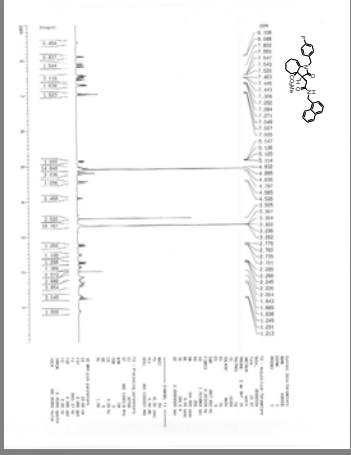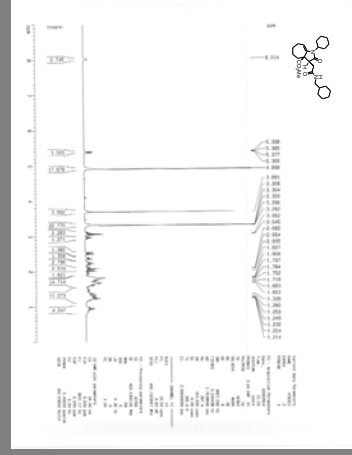

# Pyrrolidinone Based Library, Plate 4

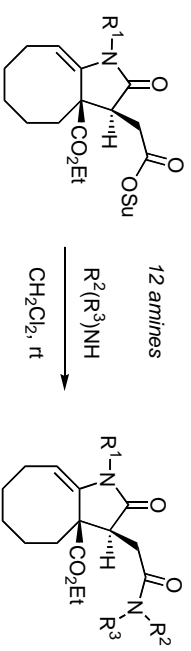

|   | 1 | 2   | 3   | 4 | 5   | 6   | 7   | 8   | 9   | 10  | 11  | 12  |
|---|---|-----|-----|---|-----|-----|-----|-----|-----|-----|-----|-----|
| A |   | 78% |     |   |     |     |     |     |     |     | 76% |     |
| B |   |     |     |   |     |     |     |     | 65% | 75% |     |     |
| C |   |     | 66% |   |     | 65% |     |     |     |     |     |     |
| D |   |     |     |   |     |     |     |     |     |     |     | 87% |
| E |   |     |     |   |     |     | 95% |     |     |     |     |     |
| F |   |     |     |   | 75% |     |     |     |     |     |     |     |
| G |   |     |     |   |     |     |     | 97% |     |     |     |     |
| H |   |     |     |   |     |     |     |     |     |     |     |     |

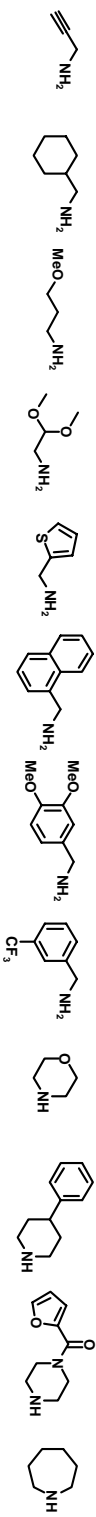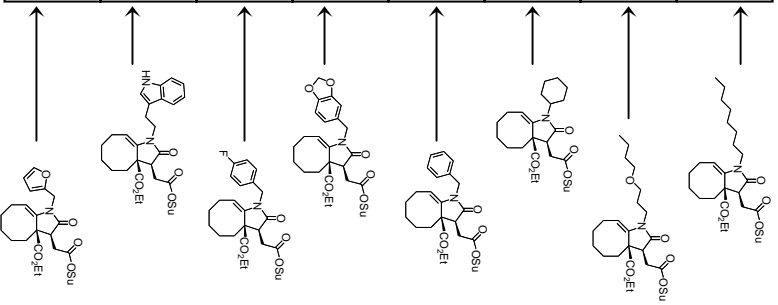

**Pyrrolidinone Based Library, Plate 4**

**A1 - A12**

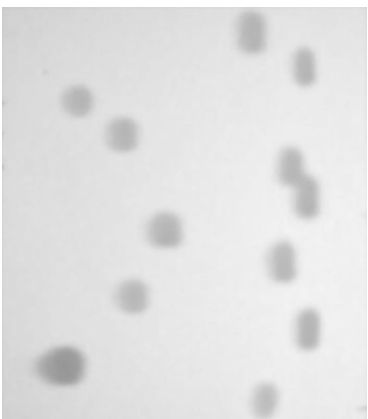

**B1 - B12**

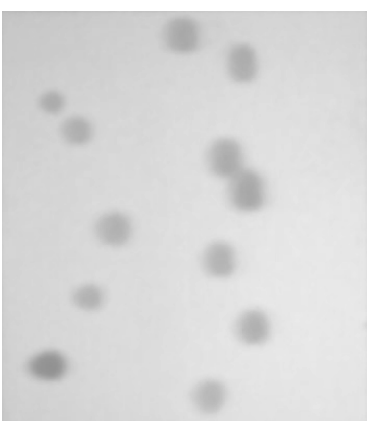

**C1 - C12**

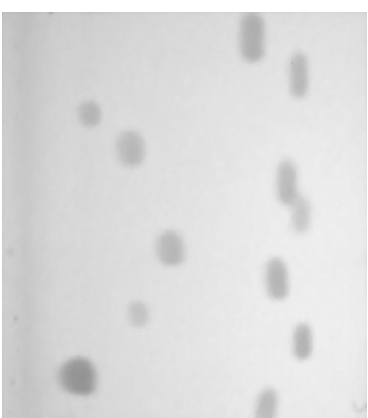

**D1 - D12**

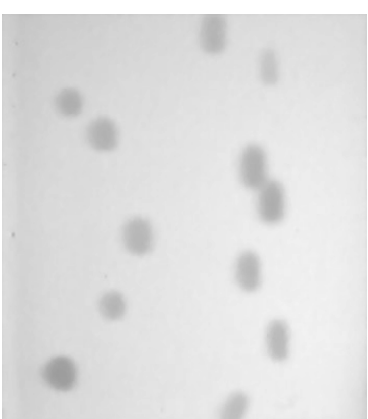

**E1 - E12**

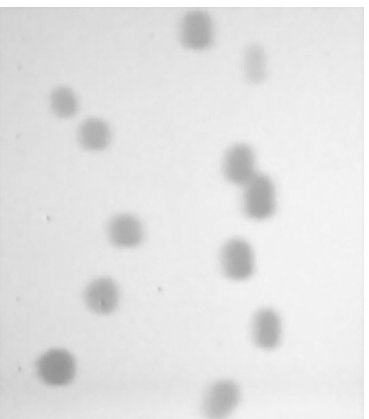

**F1 - F12**

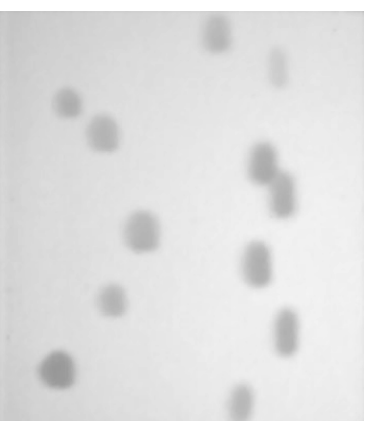

**G1 - G12**

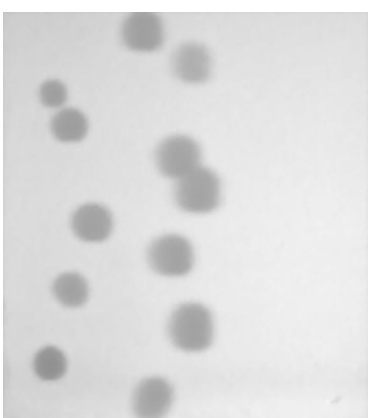

**H1 - H12**

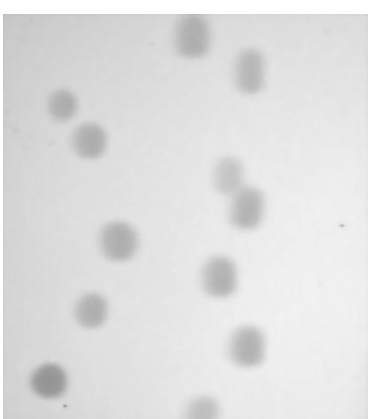



# Pyrrolidinone Based Library, Plate 5

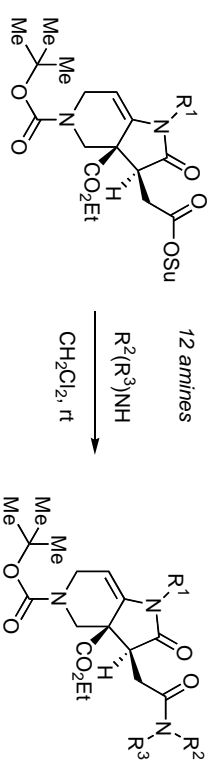

|   | 1   | 2 | 3 | 4   | 5 | 6   | 7   | 8   | 9   | 10     | 11                  | 12  |
|---|-----|---|---|-----|---|-----|-----|-----|-----|--------|---------------------|-----|
| A |     |   |   | 78% |   |     |     |     |     |        |                     |     |
| B |     |   |   |     |   |     |     |     |     |        | 67%                 | 87% |
| C |     |   |   |     |   |     | 91% |     |     |        | Low Purity From TLC |     |
| D |     |   |   |     |   | 82% |     | 73% |     |        |                     |     |
| E |     |   |   |     |   | 82% |     |     |     |        |                     |     |
| F |     |   |   |     |   |     |     |     | 75% |        |                     |     |
| G |     |   |   |     |   |     |     |     |     | quant. |                     |     |
| H | 87% |   |   |     |   |     |     |     |     |        |                     |     |

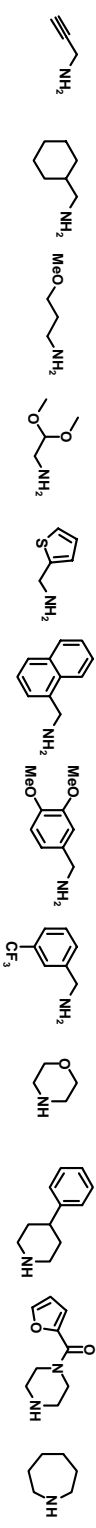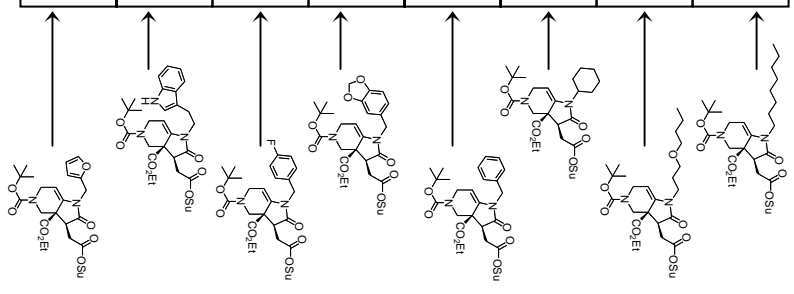

Pyrrolidinone Based Library, Plate 5

**A1 - A12**

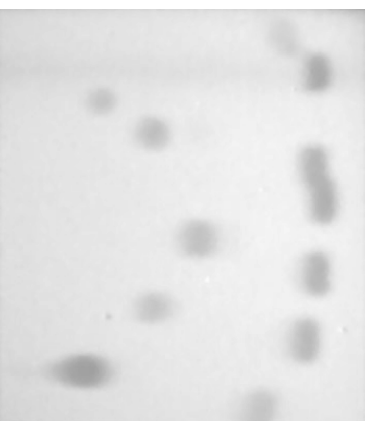

**B1 - B12**

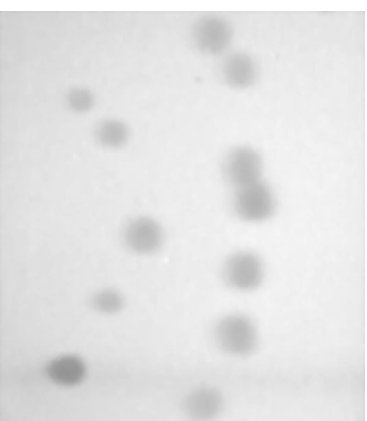

**C1 - C12**

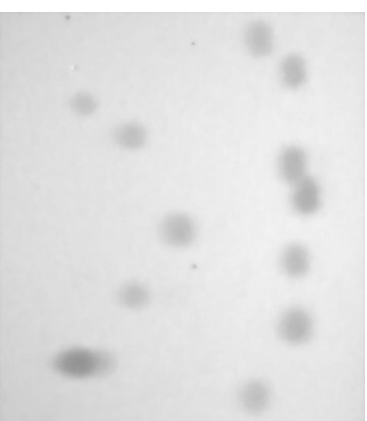

**D1 - D12**

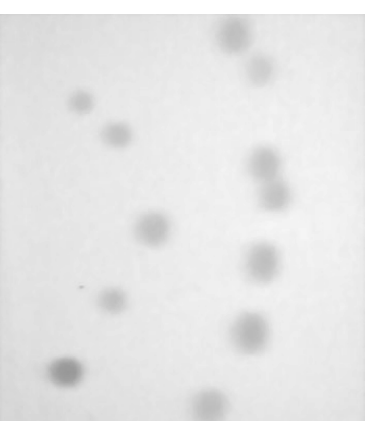

**E1 - E12**

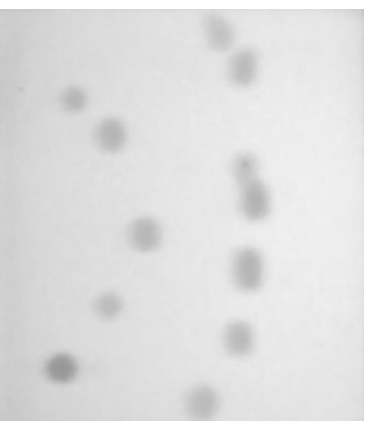

**F1 - F12**

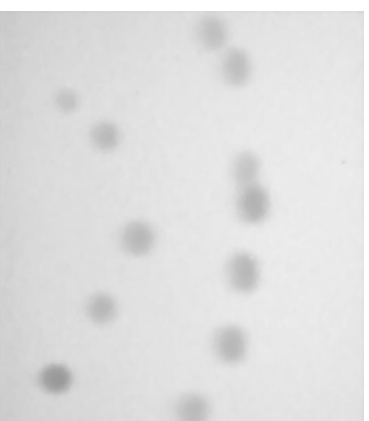

**G1 - G12**

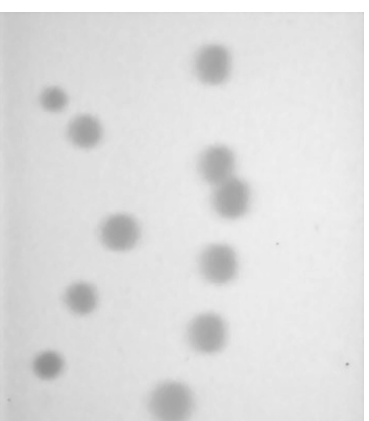

**H1 - H12**

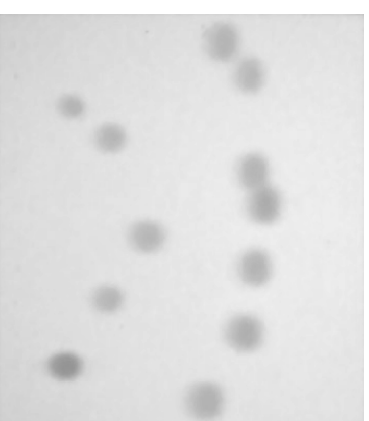





# Pyrrolidinone Based Library, Plate 6

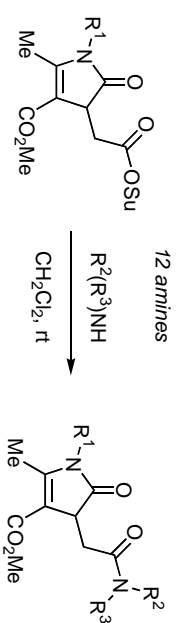

|          | 1 | 2   | 3   | 4   | 5   | 6   | 7   | 8   | 9 | 10  | 11  | 12 |
|----------|---|-----|-----|-----|-----|-----|-----|-----|---|-----|-----|----|
| <b>A</b> |   | 56% |     |     |     |     |     |     |   |     | 48% |    |
| <b>B</b> |   |     |     |     |     |     | 62% |     |   |     |     |    |
| <b>C</b> |   |     |     | 59% |     |     |     |     |   |     |     |    |
| <b>D</b> |   |     | 44% |     |     | 59% |     |     |   |     |     |    |
| <b>E</b> |   | 86% |     |     |     |     |     | 76% |   |     |     |    |
| <b>F</b> |   |     |     |     |     |     |     |     |   |     | 89% |    |
| <b>G</b> |   |     |     |     |     |     |     | 73% |   |     |     |    |
| <b>H</b> |   |     |     |     | 80% |     |     |     |   | 79% |     |    |

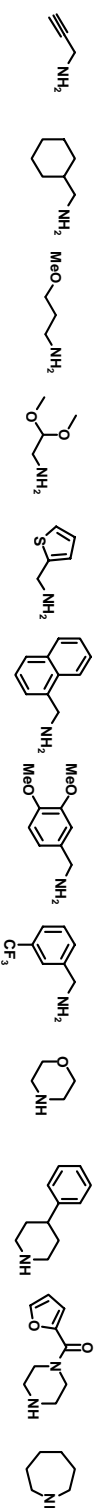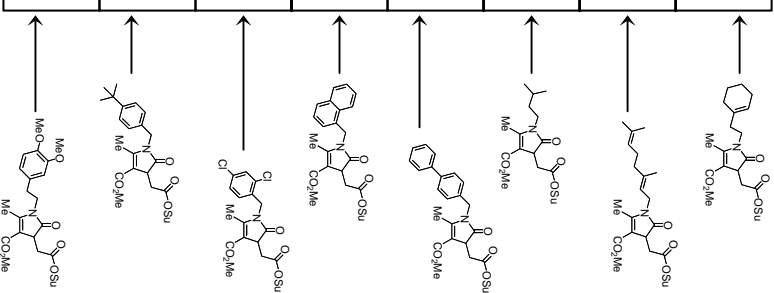

**Pyrrolidinone Based Library, Plate 6**

**A1 - A12**

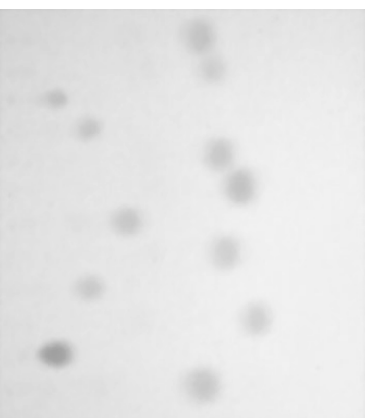

**B1 - B12**

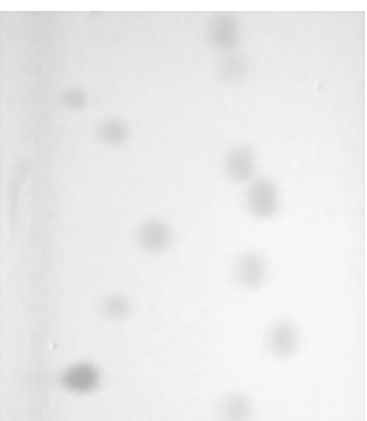

**C1 - C12**

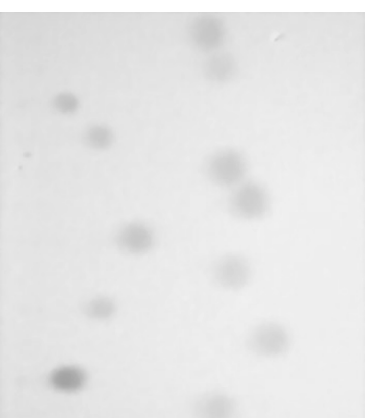

**D1 - D12**

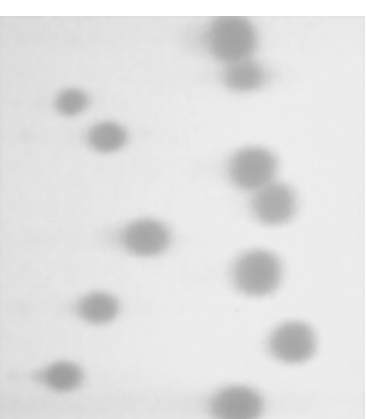

**E1 - E12**

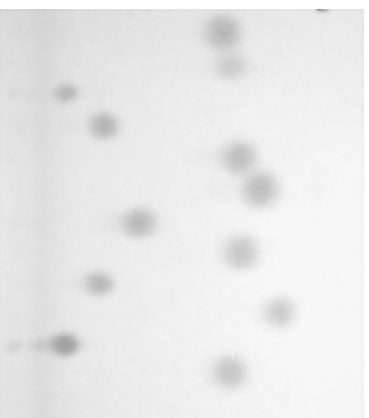

**F1 - F12**

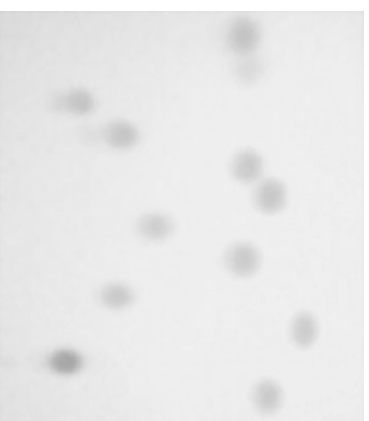

**G1 - G12**

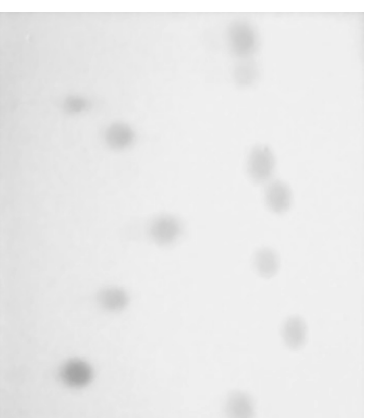

**H1 - H12**

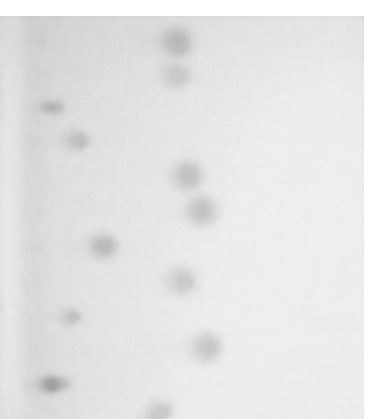

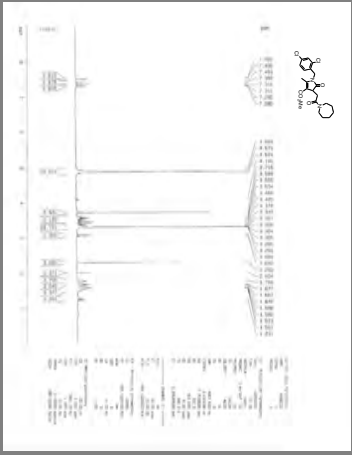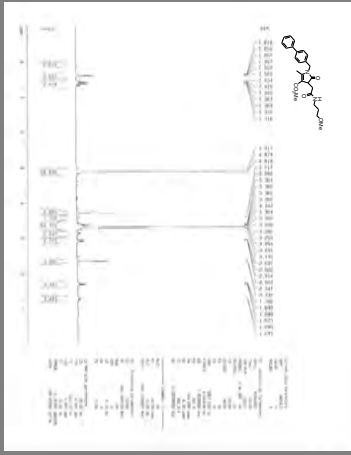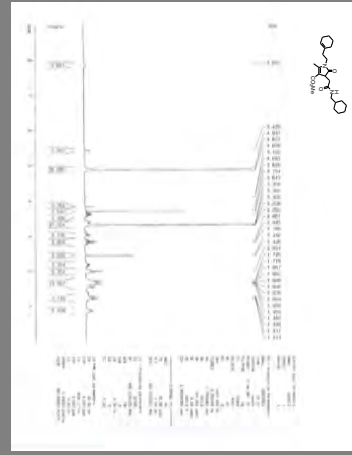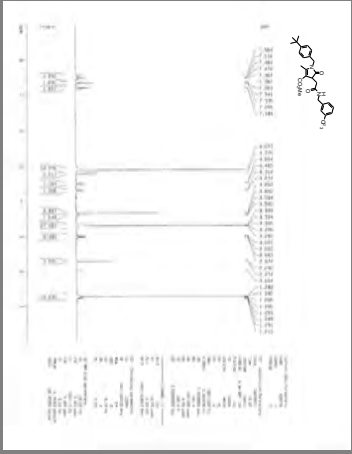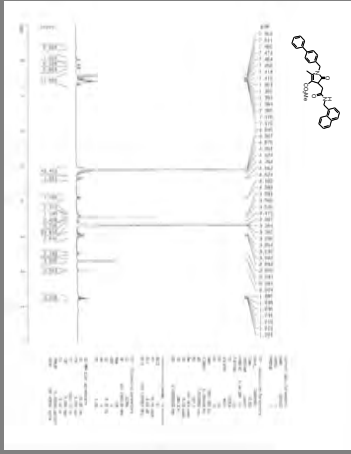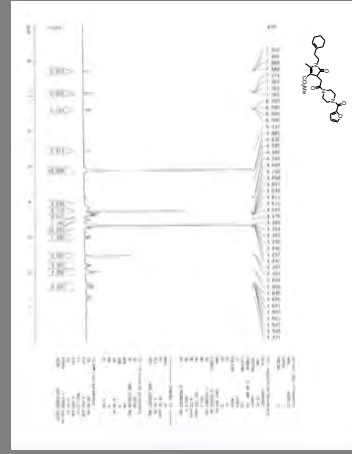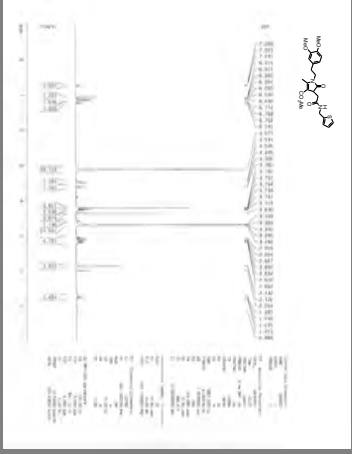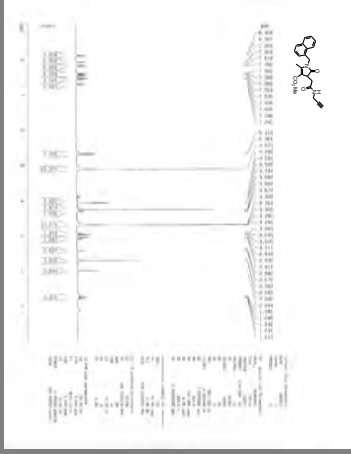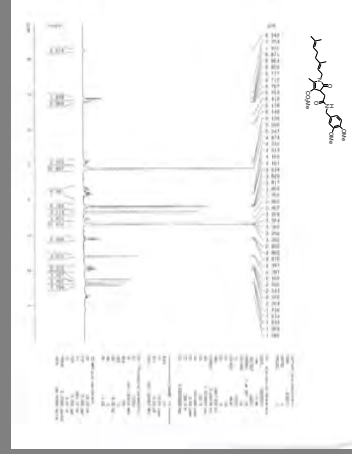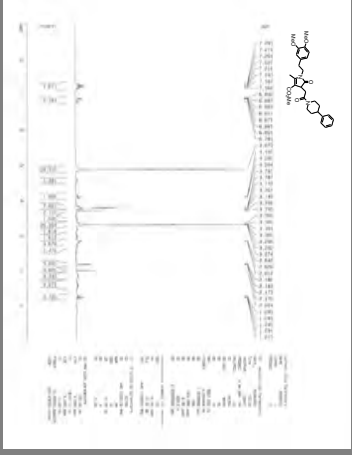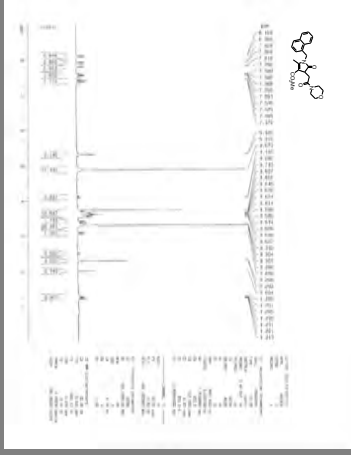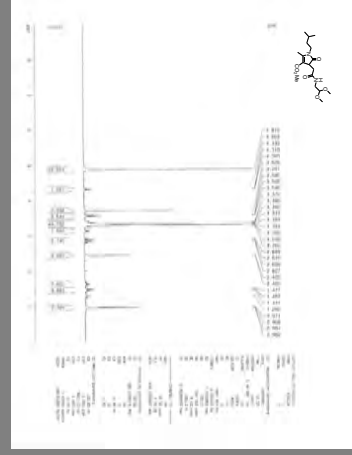

# Pyrrolidinone Based Library, Plate 7

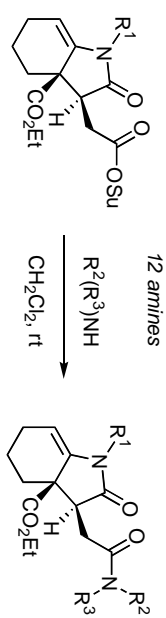

|          | 1 | 2   | 3   | 4   | 5   | 6   | 7   | 8   | 9   | 10  | 11  | 12  |
|----------|---|-----|-----|-----|-----|-----|-----|-----|-----|-----|-----|-----|
| <b>A</b> |   |     |     |     | 82% |     |     |     |     |     |     |     |
| <b>B</b> |   |     |     |     |     |     |     | 79% |     |     | 73% |     |
| <b>C</b> |   |     |     |     |     | 81% |     |     |     |     |     |     |
| <b>D</b> |   |     |     | 78% |     |     |     |     |     |     |     |     |
| <b>E</b> |   |     |     |     |     |     |     |     |     | 87% |     |     |
| <b>F</b> |   |     |     |     |     |     | 99% |     |     |     |     | 73% |
| <b>G</b> |   |     |     |     |     |     |     |     | 67% |     |     |     |
| <b>H</b> |   | 77% | 62% |     |     |     |     |     |     |     |     |     |
|          |   |     |     |     |     |     |     |     |     |     |     |     |

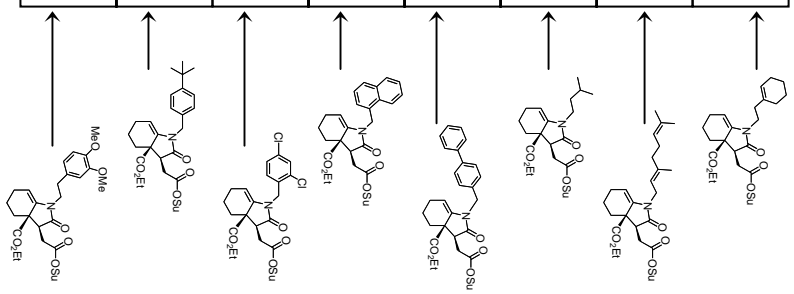

Pyrrolidinone Based Library, Plate 7

**A1 - A12**

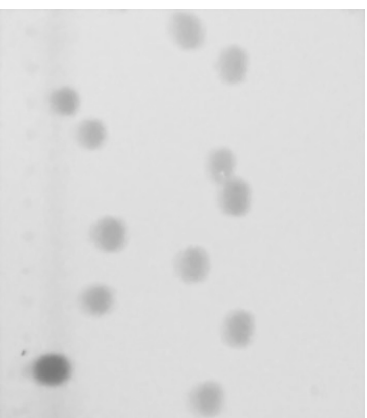

**B1 - B12**

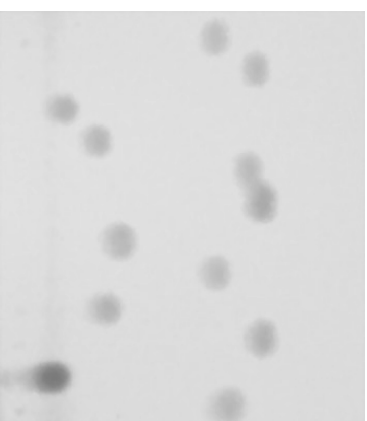

**C1 - C12**

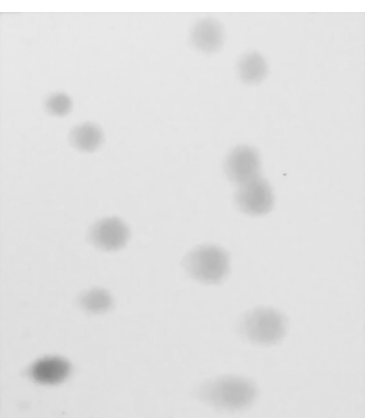

**D1 - D12**

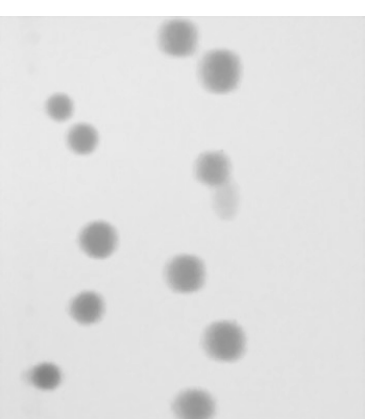

**E1 - E12**

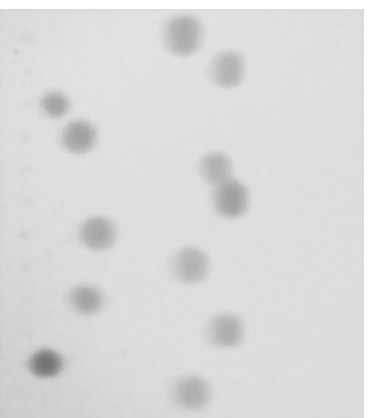

**F1 - F12**

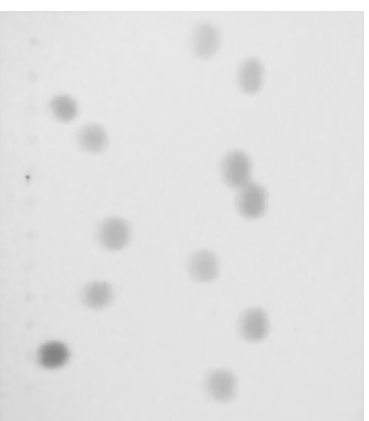

**G1 - G12**

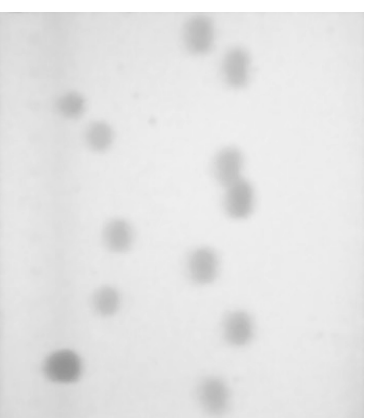

**H1 - H12**

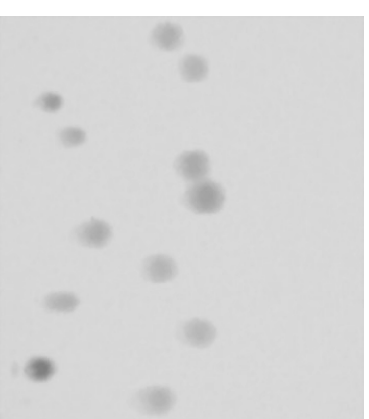

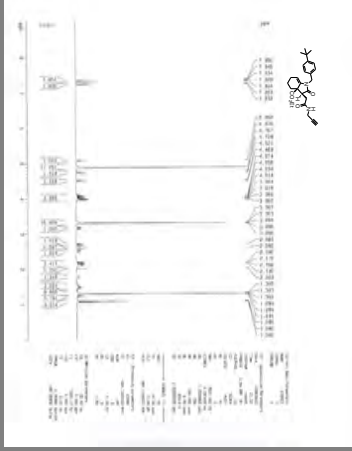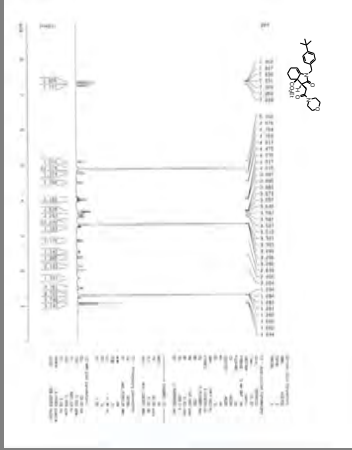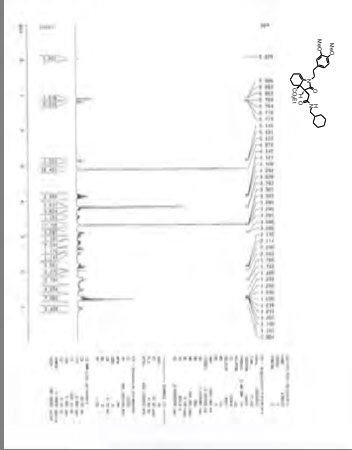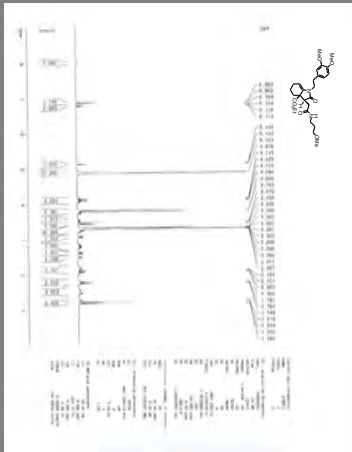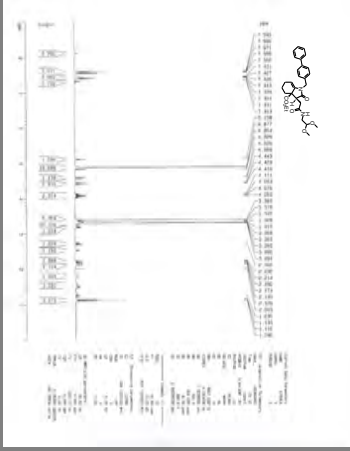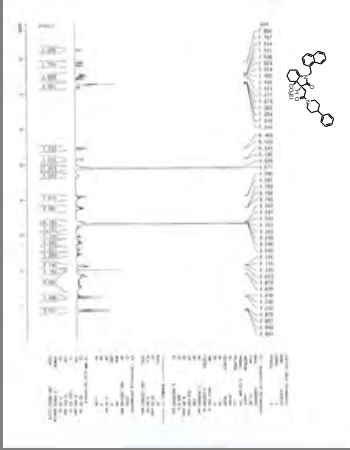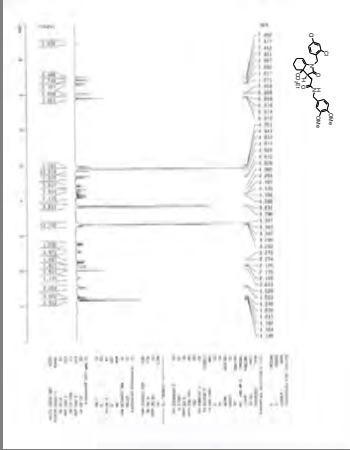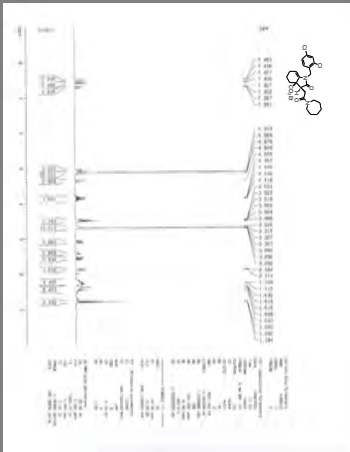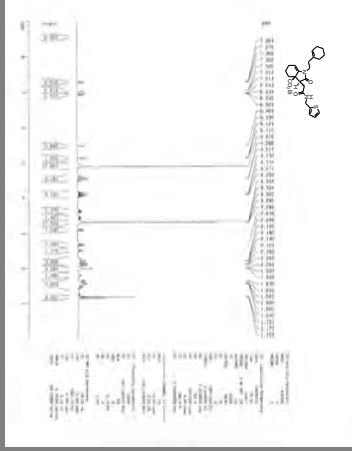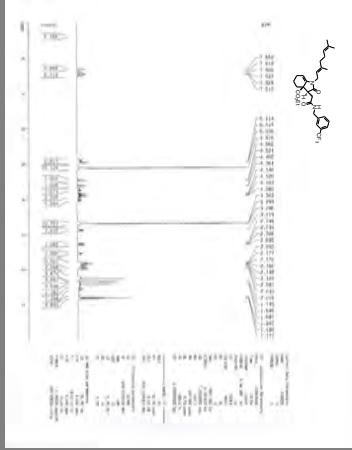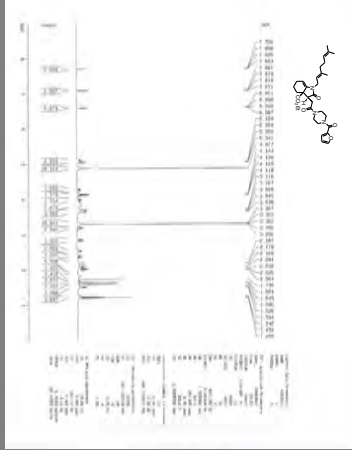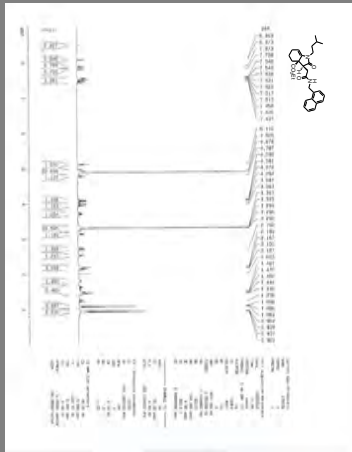

# Pyrrolidinone Based Library, Plate 8

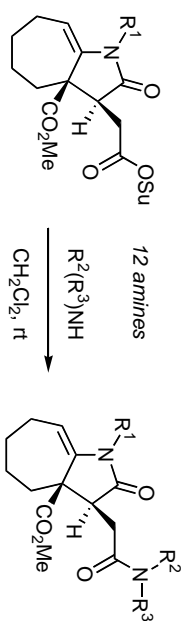

|          | 1 | 2   | 3   | 4   | 5   | 6   | 7   | 8   | 9      | 10 | 11  | 12  |
|----------|---|-----|-----|-----|-----|-----|-----|-----|--------|----|-----|-----|
| <b>A</b> |   |     |     |     |     | 86% | 99% |     |        |    |     |     |
| <b>B</b> |   | 86% |     |     |     |     |     | 83% |        |    |     |     |
| <b>C</b> |   |     | 67% |     |     |     |     |     |        |    |     |     |
| <b>D</b> |   |     |     |     |     |     |     | 97% |        |    |     |     |
| <b>E</b> |   |     |     | 72% |     |     |     |     |        |    |     |     |
| <b>F</b> |   |     |     |     |     |     |     |     | quant. |    |     |     |
| <b>G</b> |   |     |     |     |     |     |     |     |        |    |     | 91% |
| <b>H</b> |   |     |     |     | 71% |     |     |     |        |    | 46% |     |

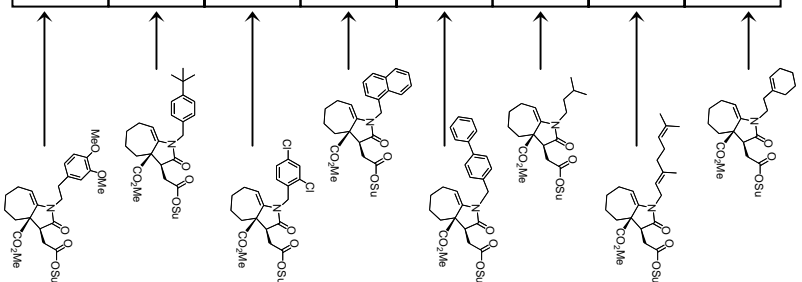

**Pyrrolidinone Based Library, Plate 8**

**A1 - A12**

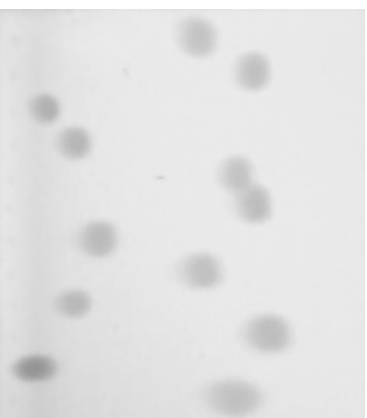

**B1 - B12**

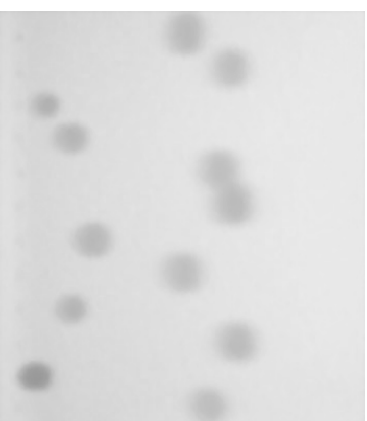

**C1 - C12**

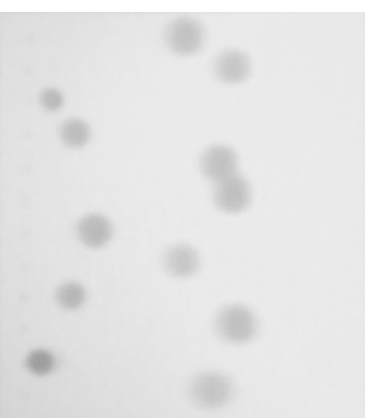

**D1 - D12**

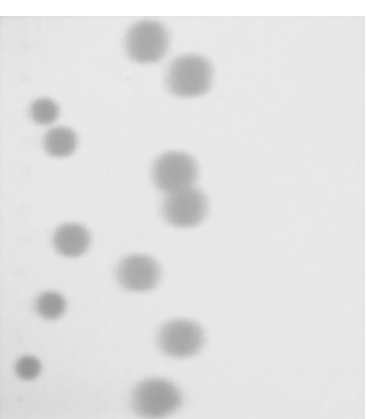

**E1 - E12**

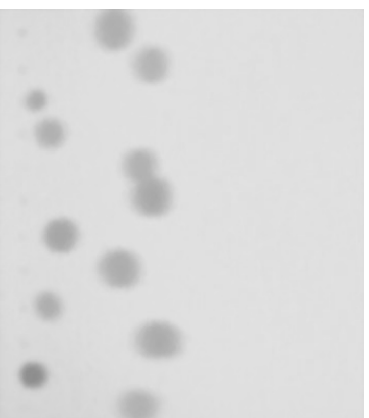

**F1 - F12**

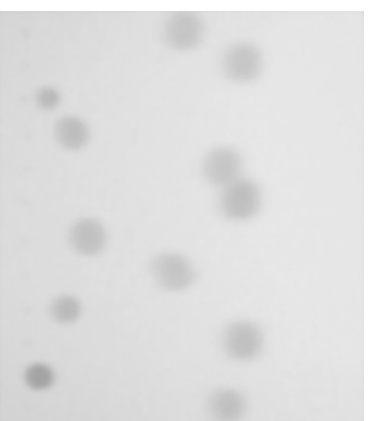

**G1 - G12**

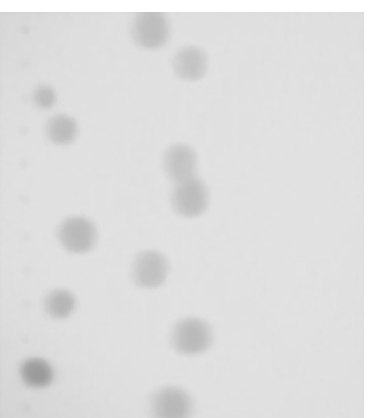

**H1 - H12**

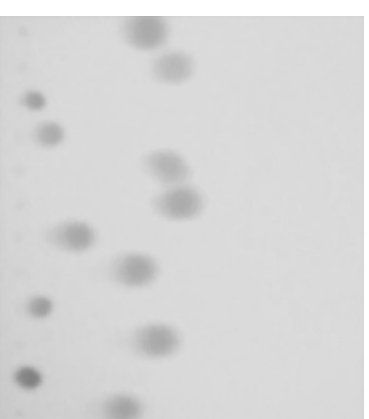





# Pyrrolidinone Based Library, Plate 9

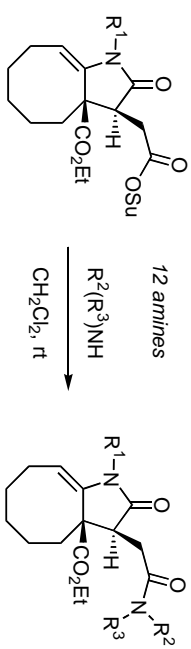

|   | 1 | 2 | 3   | 4   | 5 | 6 | 7 | 8   | 9   | 10  | 11  | 12  |
|---|---|---|-----|-----|---|---|---|-----|-----|-----|-----|-----|
| A |   |   |     |     |   |   |   |     |     |     |     | 68% |
| B |   |   |     | 73% |   |   |   |     | 58% |     |     |     |
| C |   |   | 74% |     |   |   |   |     |     |     |     |     |
| D |   |   |     |     |   |   |   |     |     | 81% |     |     |
| E |   |   |     |     |   |   |   | 92% |     |     |     |     |
| F |   |   |     |     |   |   |   |     |     |     | 70% |     |
| G |   |   |     |     |   |   |   |     |     |     |     |     |
| H |   |   |     |     |   |   |   |     |     |     |     |     |

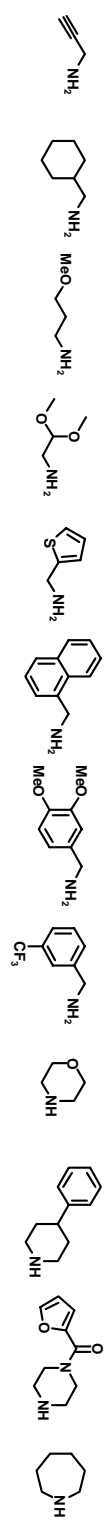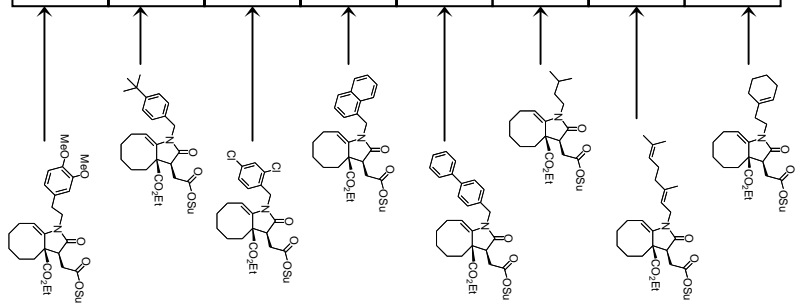

**Pyrrolidinone Based Library, Plate 9**

**A1 - A12**

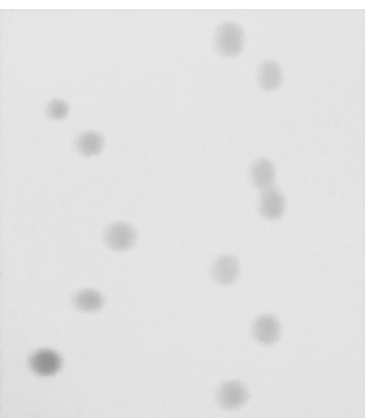

**B1 - B12**

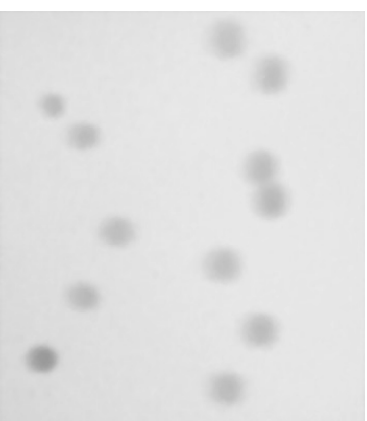

**C1 - C12**

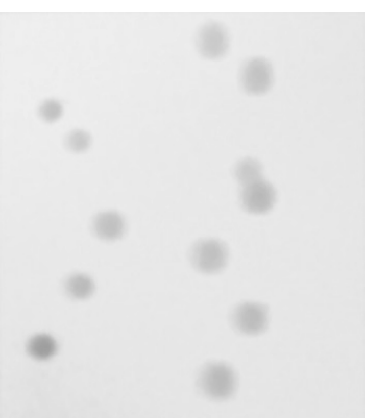

**D1 - D12**

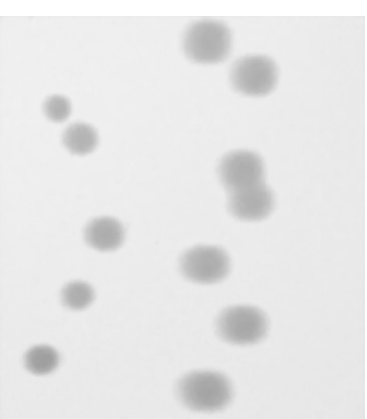

**E1 - E12**

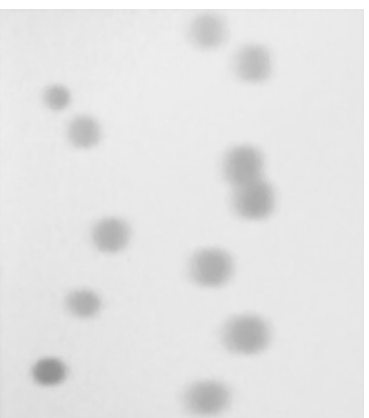

**F1 - F12**

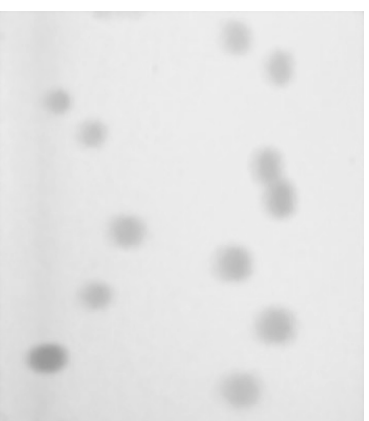

**G1 - G12**

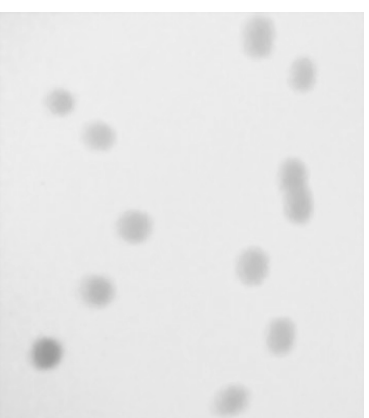

**H1 - H12**

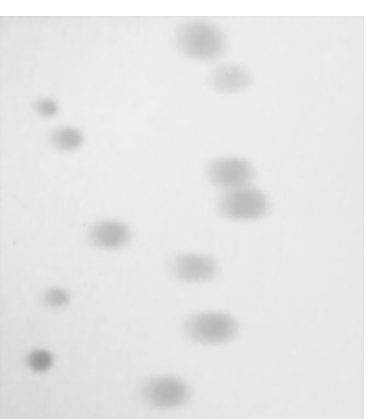



# Pyrrolidinone Based Library, Plate 10

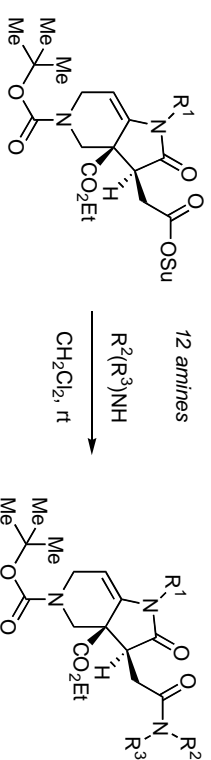

|   | 1   | 2   | 3                 | 4                 | 5   | 6                 | 7                 | 8 | 9 | 10  | 11    | 12  |
|---|-----|-----|-------------------|-------------------|-----|-------------------|-------------------|---|---|-----|-------|-----|
| A |     |     |                   |                   |     |                   |                   |   |   |     | Empty |     |
| B | 72% |     |                   |                   |     |                   |                   |   |   |     | Empty |     |
| C |     |     | 64%<br>80% purity |                   |     |                   |                   |   |   |     |       |     |
| D |     |     |                   |                   |     | 96%<br>90% purity |                   |   |   | 98% |       |     |
| E |     |     |                   |                   |     |                   | 99%<br>90% purity |   |   |     |       |     |
| F |     | 68% |                   |                   |     |                   |                   |   |   |     | Empty | 61% |
| G |     |     |                   | 68%<br>80% purity |     |                   |                   |   |   |     | Empty |     |
| H |     |     |                   |                   | 99% |                   |                   |   |   |     | 78%   |     |

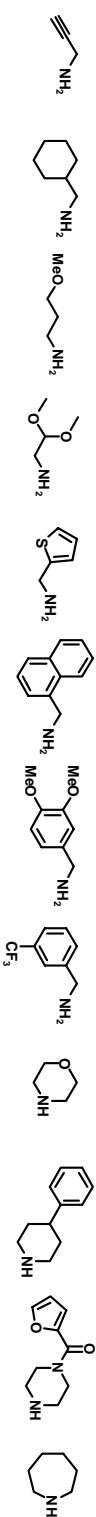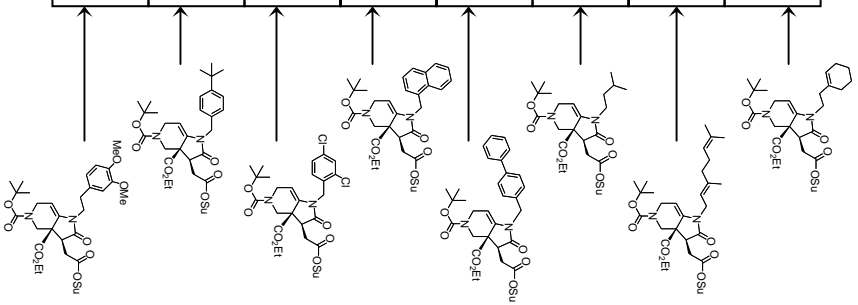

**Pyrrrolidinone Based Library, Plate 10**

**A1 - A12**

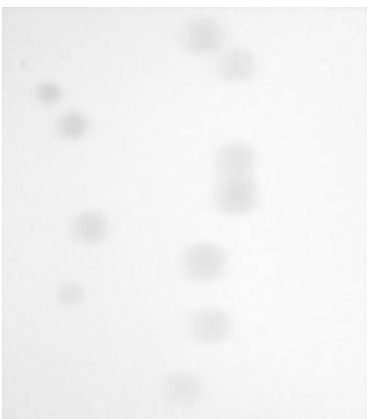

**B1 - B12**

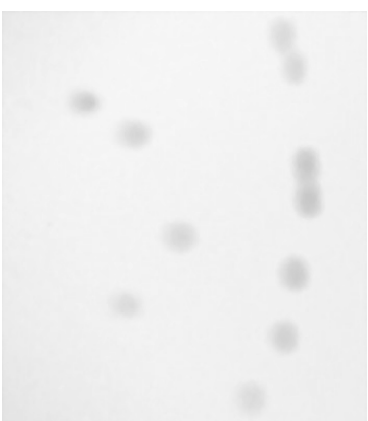

**C1 - C12**

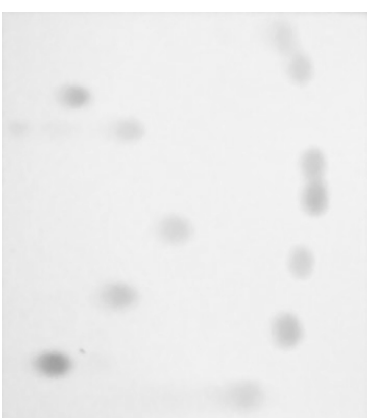

**D1 - D12**

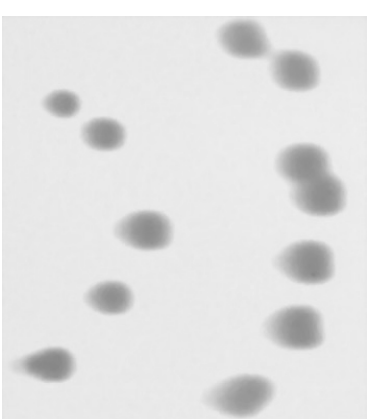

**E1 - E12**

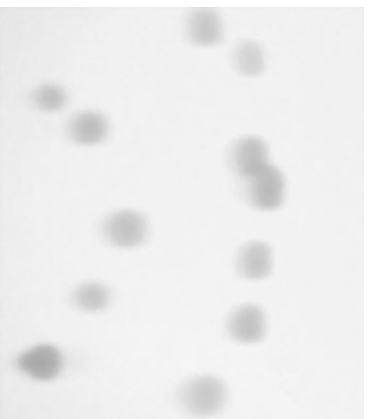

**F1 - F12**

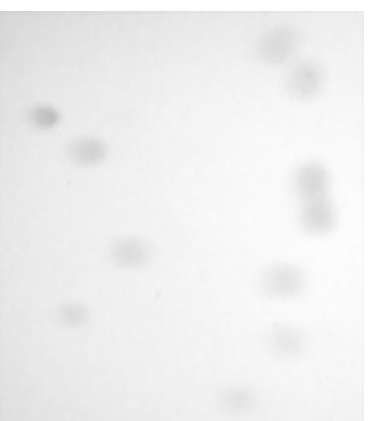

**G1 - G12**

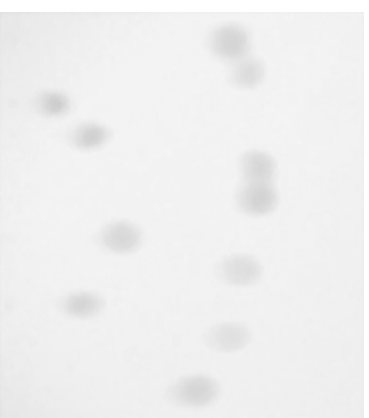

**H1 - H12**

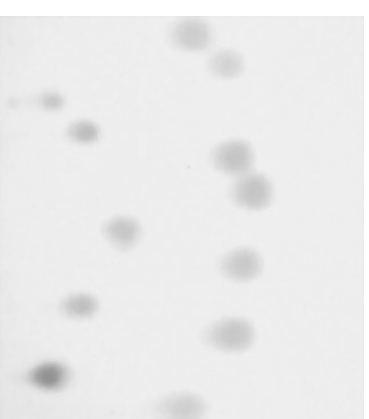



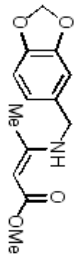

15

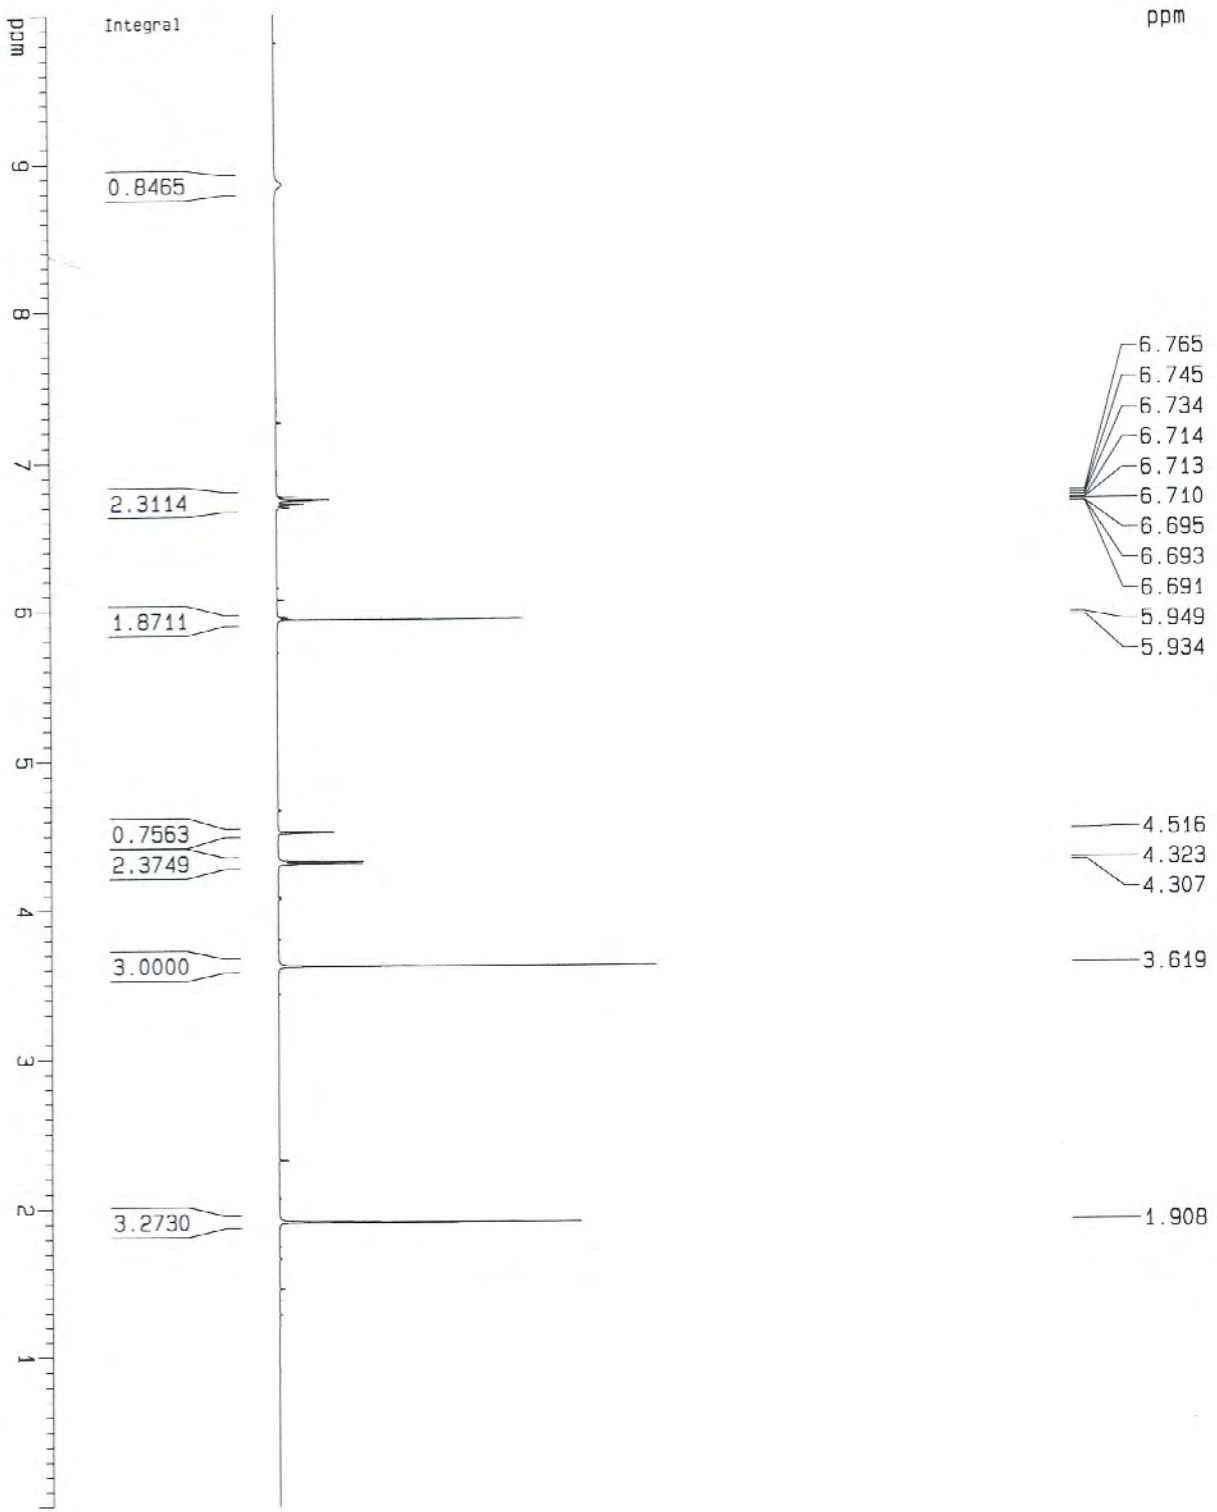

Current Data Parameters  
 NAME A1B5  
 EXPNO 1  
 PROCNO 1

F2 - Acquisition Parameters  
 Date\_ 20061028  
 Time 19.41  
 INSTRUM spect  
 PROBHD 5 mm QNP 1H  
 PULPROG zg  
 TD 16384  
 SOLVENT COCl3  
 NS 4  
 DS 0  
 SWH 4807.692 Hz  
 FIDRES 0.293436 Hz  
 AG 1.7039860 sec  
 RG 64  
 DW 104.000 usec  
 DE 5.00 usec  
 TE 300.0 K  
 D1 2.00000000 sec

==== CHANNEL f1 =====  
 NUC1 1H  
 P1 10.50 usec  
 PL1 0.00 dB  
 SFO1 400.1320007 MHz

F2 - Processing parameters  
 SI 32768  
 SF 400.1300089 MHz  
 MDW EM  
 SSB 0  
 LB 0.30 Hz  
 GB 0  
 PC 1.00

1D NMR plot parameters  
 CX 20.00 cm  
 F1P 10.000 ppm  
 F1 4001.30 Hz  
 F2P 0.000 ppm  
 F2 0.00 Hz  
 PPMCM 0.50000 ppm/cm  
 HZCM 200.06500 Hz/cm



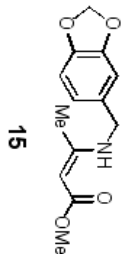

ppm

- 170.819
- 161.706
- 148.029
- 146.849
- 132.483
- 119.910
- 108.358
- 107.363
- 101.031
- 82.762
- 77.252
- 76.999
- 76.744
- 49.941
- 46.582
- 19.309

ppm

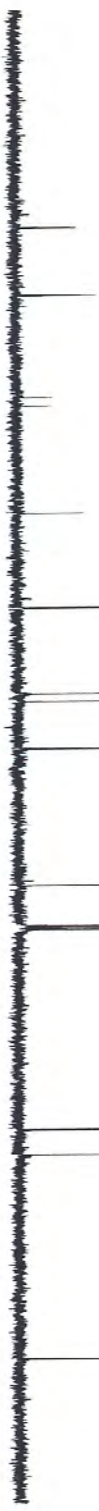

Current Data Parameters  
 NAME A482\_A185  
 EXPNO 5  
 PROCNO 1

F2 - Acquisition Parameters  
 Date\_ 20061029  
 Time 17.48  
 INSTRUM spect  
 PROBHID 5 mm QNP 1H  
 PULPROG zgpg  
 TD 112780  
 SOLVENT CDCl3  
 NS 44  
 DS 0  
 SMH 31445.541 Hz  
 FIDRES 0.270831 Hz  
 AQ 1.7932520 sec  
 RG 1024  
 DM 15.500 usec  
 DE 7.50 usec  
 TE 300.0 K  
 D1 4.00000000 sec  
 d11 0.03000000 sec

===== CHANNEL f1 =====  
 NUC1 13C  
 P1 9.00 usec  
 PL1 3.00 dB  
 SF01 125.7728299 MHz

===== CHANNEL f2 =====  
 CPDPRG2 waltz16  
 NUC2 1H  
 PCPD2 90.00 usec  
 PL2 120.00 dB  
 PL12 15.00 dB  
 SF02 500.1338000 MHz

F2 - Processing Parameters  
 SI 32768  
 SF 125.7577964 MHz  
 MDW EM  
 SSB 0  
 LB 1.00 Hz  
 GB 0  
 PC 1.40

1D NMR plot parameters  
 CX 20.00 cm  
 F1P 200.000 ppm  
 F1 25151.56 Hz  
 F2P 0.000 ppm  
 F2 0.00 Hz  
 PPMCM 10.00000 ppm/cm  
 HZCM 1257.57800 Hz/cm



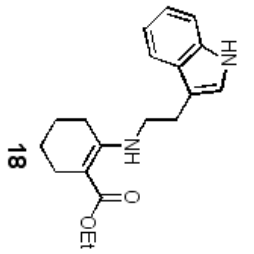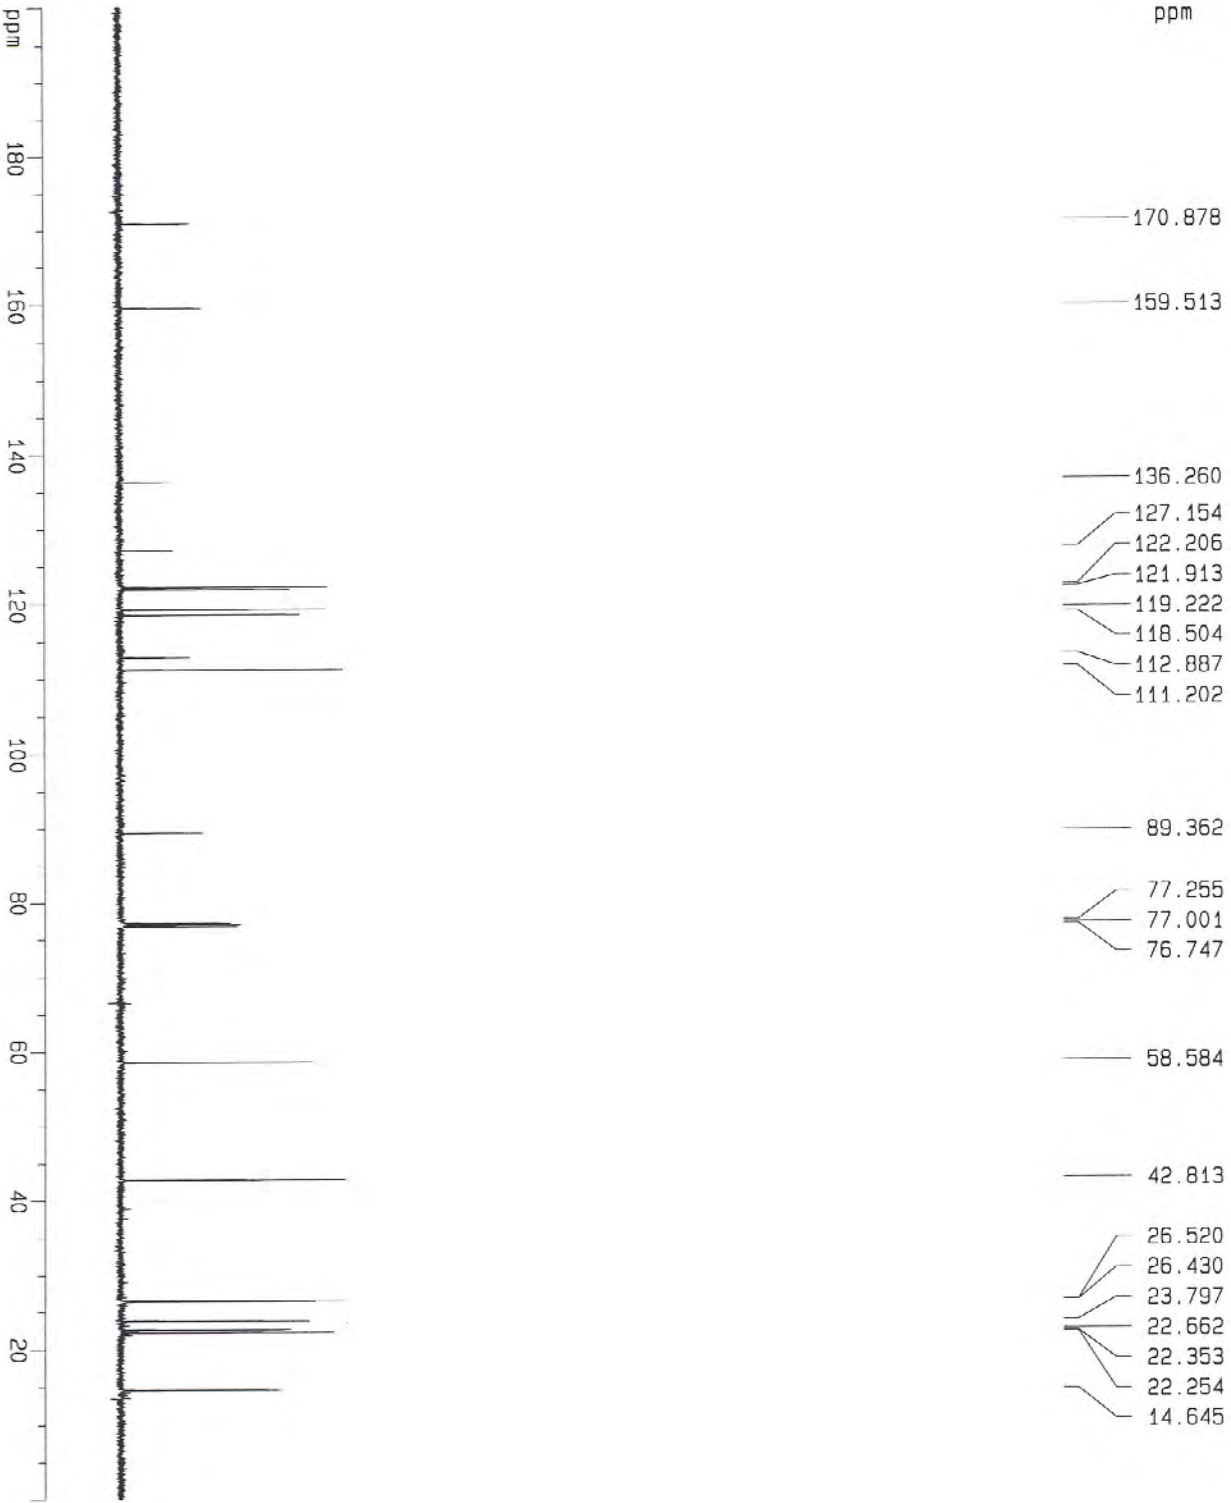

Current Data Parameters  
 NAME A2B7  
 EXPNO 8  
 PROCNO 1

F2 - Acquisition Parameters

Date\_ 20061031  
 Time 16.44  
 INSTRUM spect  
 PROCNO 5 mm QNP 1H  
 PULPROG zgpg  
 TD 142780  
 SOLVENT CDCl3  
 NS 45  
 DS 0  
 SMH 31446.541 Hz  
 FIDRES 0.27831 Hz  
 AQ 1.7932520 sec  
 RG 2048  
 DW 15.900 usec  
 DE 7.50 usec  
 TE 300.0 K  
 D1 4.0000000 sec  
 d11 0.0300000 sec

===== CHANNEL f1 =====

NUC1 13C  
 P1 8.00 usec  
 PL1 3.00 dB  
 SF01 125.7728299 MHz

===== CHANNEL f2 =====

CPDPRG2 waltz16  
 NUC2 1H  
 PCPD2 90.00 usec  
 PL2 120.00 dB  
 PL12 19.00 dB  
 SF02 500.1338000 MHz

F2 - Processing parameters

SI 32768  
 SF 125.7578002 MHz  
 WDM EM  
 SSB 0  
 LB 1.00 Hz  
 GB 0  
 PC 1.40

1D NMR plot parameters

CX 20.00 cm  
 F1P 200.000 dpm  
 F1 25151.56 Hz  
 F2P 0.000 dpm  
 F2 0.00 Hz  
 FPMCM 10.00000 dpm/cm  
 HZCM 1257.57800 Hz/cm

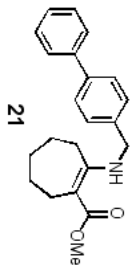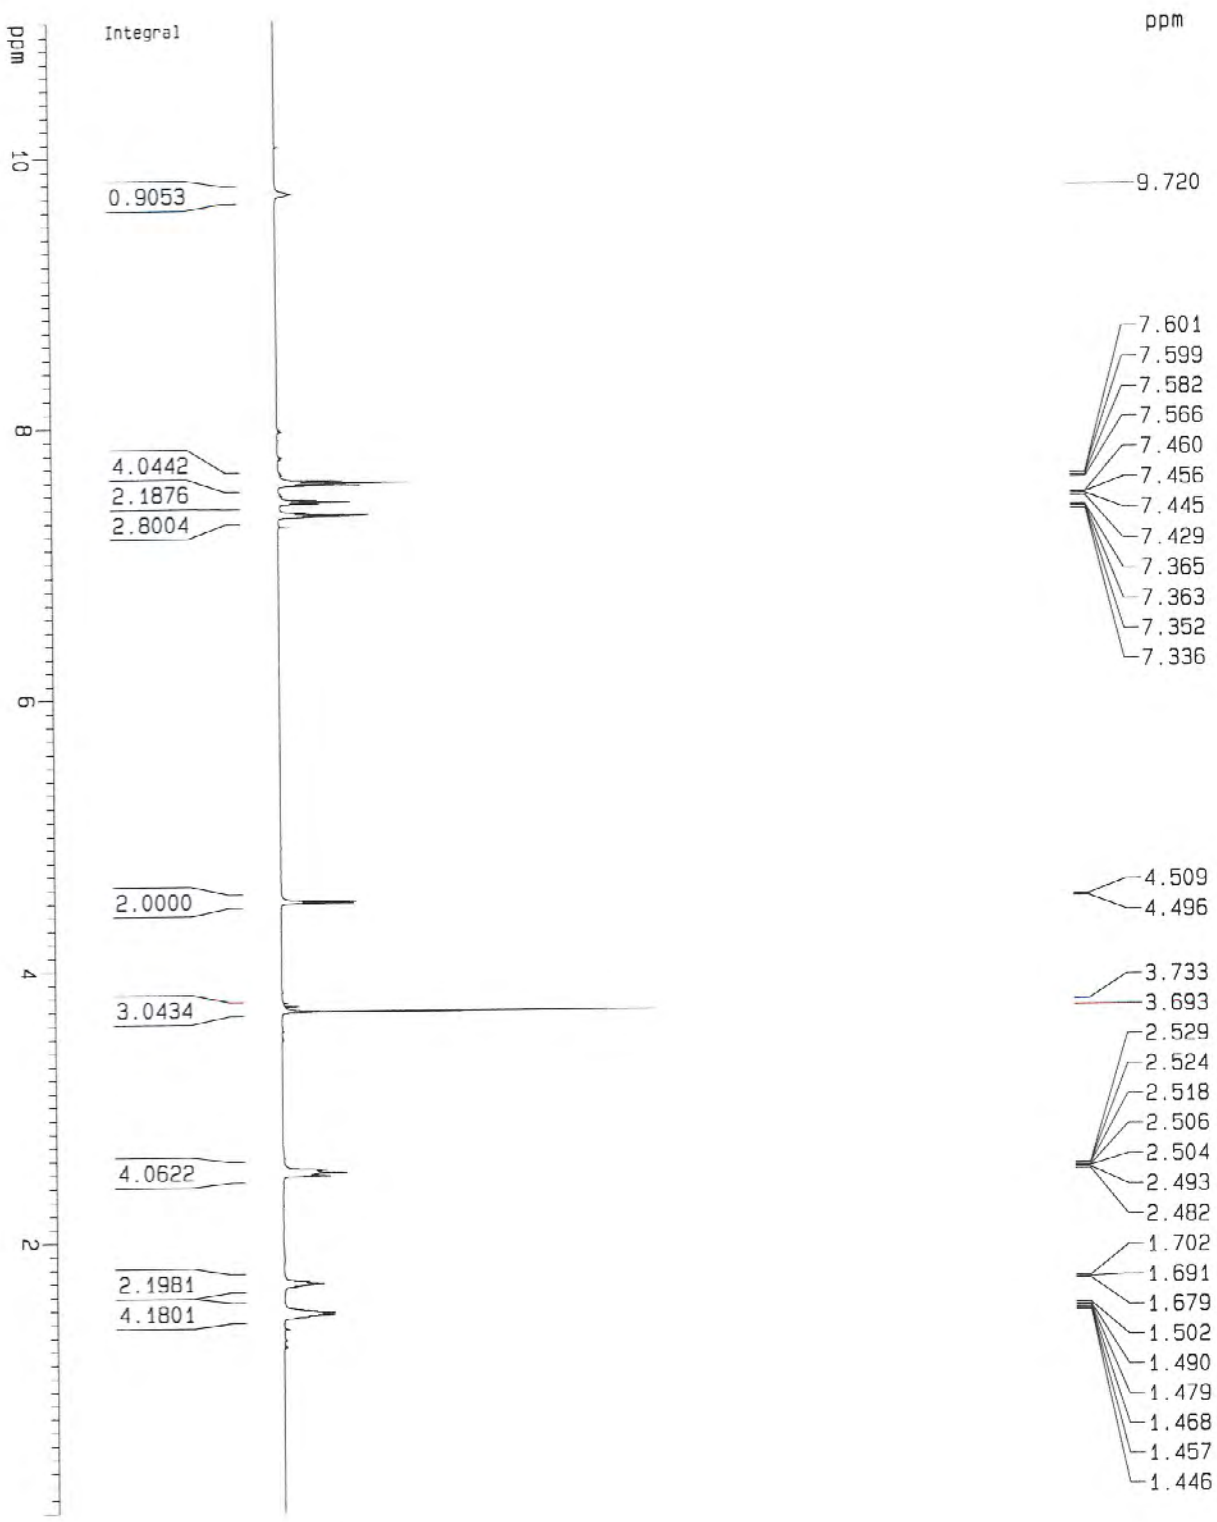

Current Data Parameters

NAME A334-Eramine

EXPNO 1

PROCNO 1

F2 - Acquisition Parameters

Date\_ 20061024

Time 9.28

INSTRUM spect

PROBHD 5 mm Multinu

PULPROG zg

TD 32768

SOLVENT CDCl3

NS 4

DS 0

SWH 7507.507 Hz

FIDRES 0.229111 Hz

AQ 2.1823988 sec

RG 18

DW 66.600 usec

DE 4.50 usec

TE 300.0 K

01 3.00000000 sec

==== CHANNEL f1 =====

NUC1 1H

P1 5.60 usec

PL1 0.00 dB

SFO1 500.1322000 MHz

F2 - Processing parameters

SI 16384

SF 500.1300138 MHz

KDCM EM

SSB 0

LB 0.30 Hz

GB 0

PC 1.00

1D NMR plot parameters

CX 20.00 cm

F1P 11.000 ppm

F1 5501.43 Hz

F2P 0.000 ppm

F2 0.00 Hz

PPMCM 0.55000 ppm/cm

HZCM 275.07150 Hz/cm

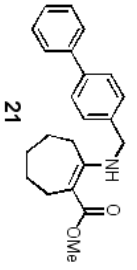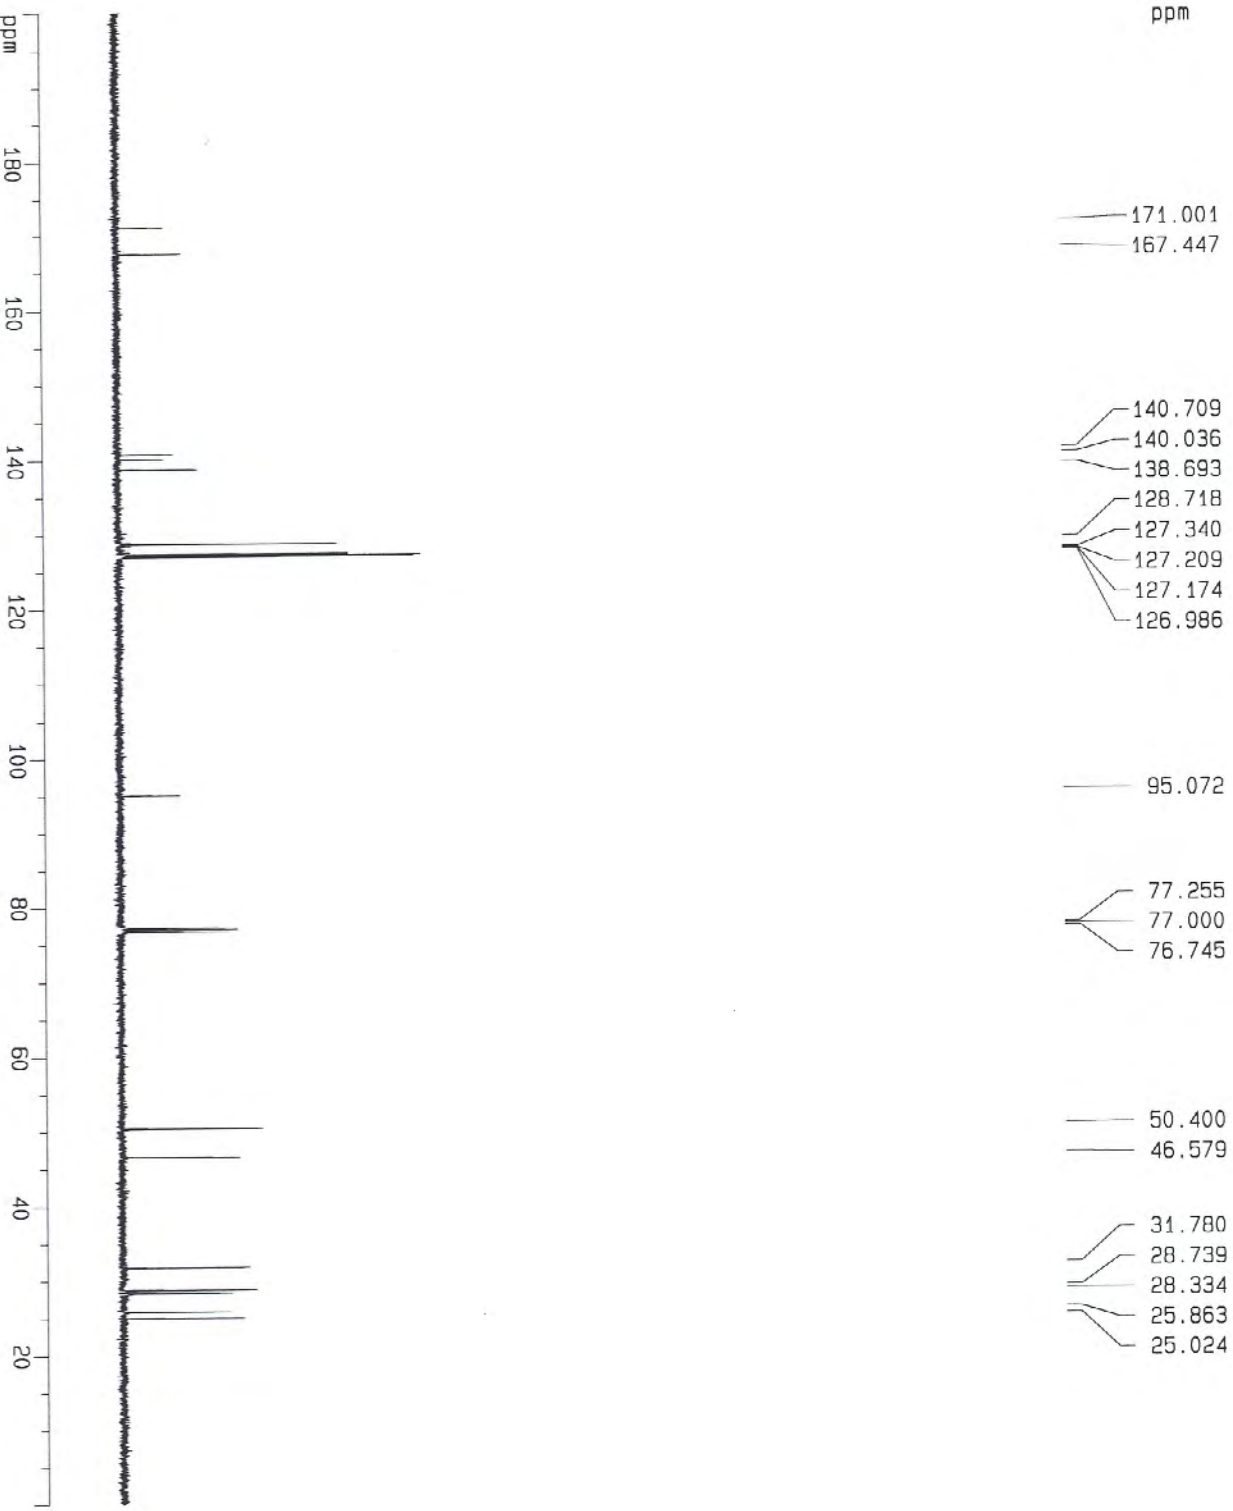

ppm

171.001  
167.447

140.709  
140.036  
138.693  
128.718  
127.340  
127.209  
127.174  
126.986

95.072

77.255  
77.000  
76.745

50.400  
46.579

31.780  
28.739  
28.334  
25.863  
25.024

Current Data Parameters

NAME ASB4-Enamine  
EXPNO 2  
PROCNO 1  
Date\_ 20051024  
Time 9.32  
INSTRUM spect  
PROBHD 5 mm M11tinu  
PULPROG zgpg  
TD 211264  
SOLVENT CDCl3  
NS 69  
DS 1  
SWH 35211.270 Hz  
FIDRES 0.165670 Hz  
AQ 2.9999988 sec  
RG 9195.2  
DM 14.200 usec  
DE 4.50 usec  
TE 300.0 K  
D1 3.00000000 sec  
d11 0.03000000 sec

===== CHANNEL f1 =====  
NUC1 13C  
P1 10.50 usec  
PL1 -3.00 dB  
SF01 125.7736214 MHz

===== CHANNEL f2 =====  
CPDPRG2 waltz16  
NUC2 1H  
PCPD2 100.00 usec  
PL2 120.00 dB  
PL12 28.00 dB  
SF02 500.1317628 MHz

F2 - Processing parameters  
SI 32758  
SF 125.7578002 MHz  
WDW EN  
SSB 0  
LB 1.00 Hz  
GB 0  
PC 1.40

1D NMR plot parameters  
CX 20.00 cm  
F1P 200.000 ppm  
F1 25151.56 Hz  
F2P 0.000 ppm  
F2 0.00 Hz  
PPVCM 10.00000 DPM/cm  
HZCM 1257.57800 Hz/cm

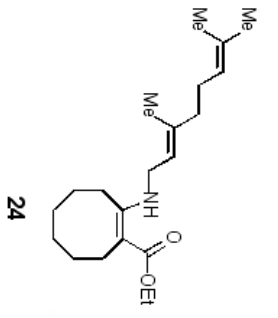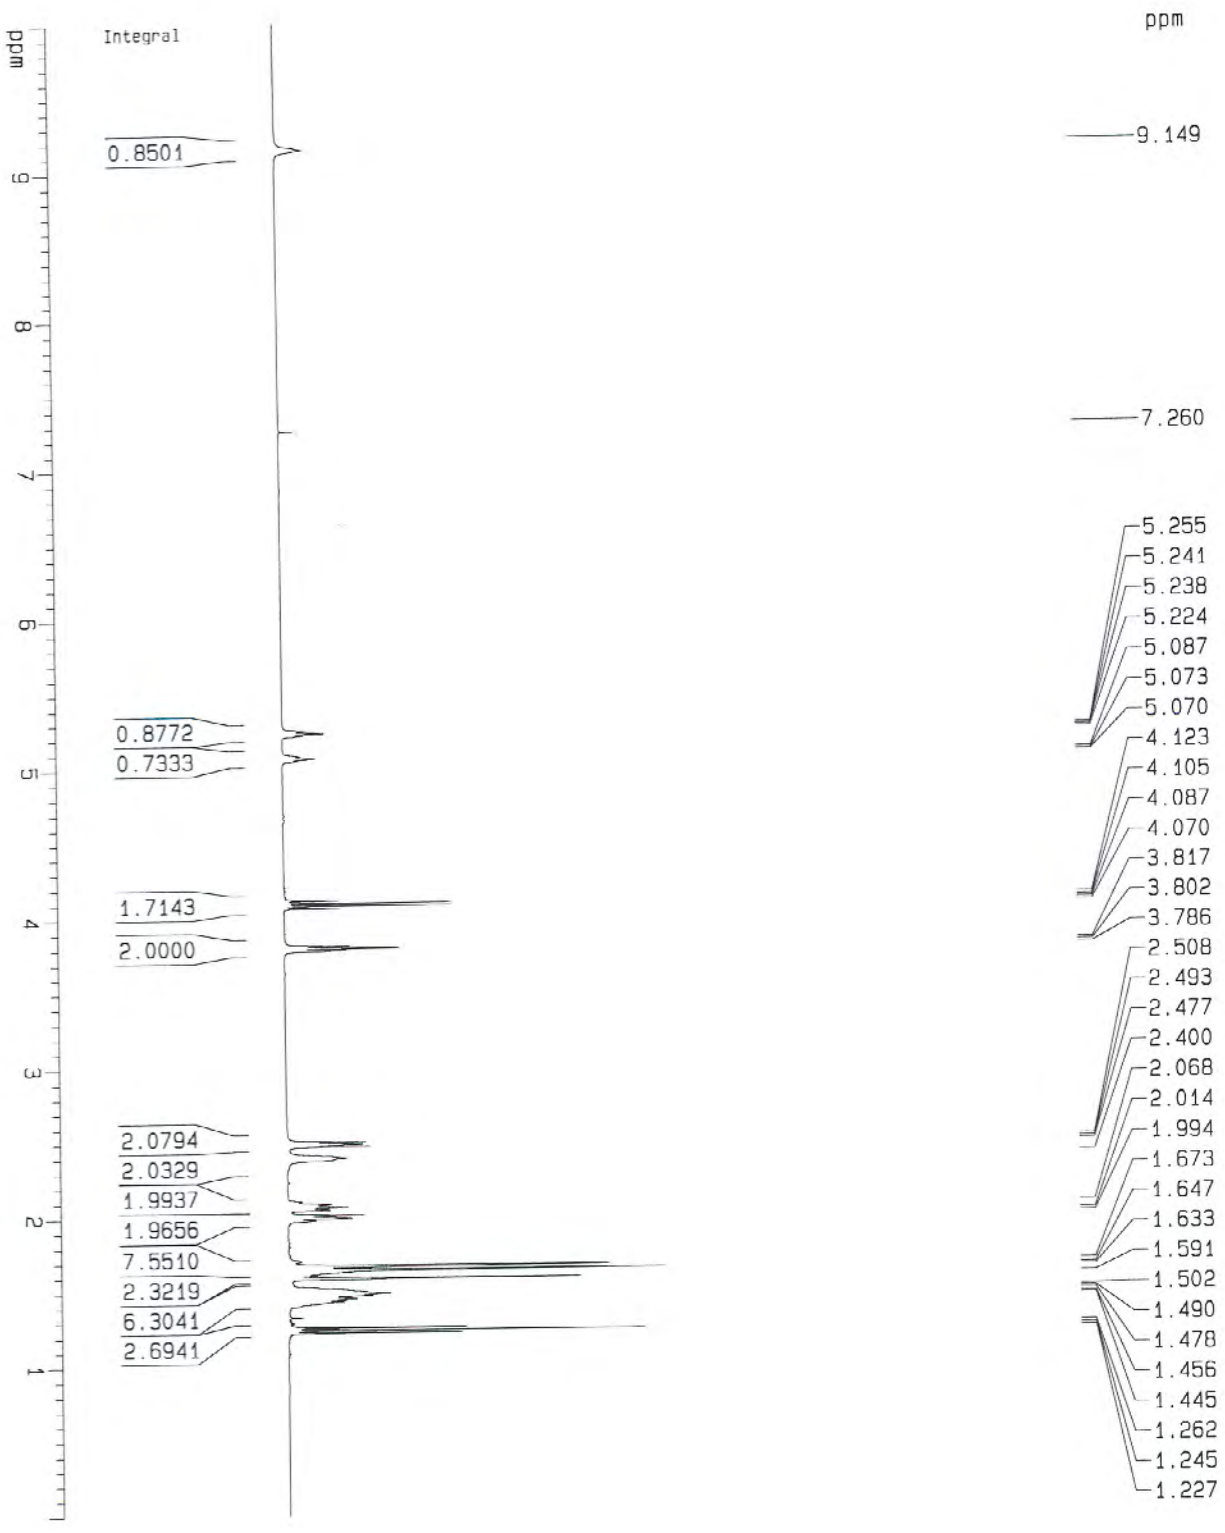

Current Data Parameters

|        |      |
|--------|------|
| NAME   | A4B2 |
| EXNO   | 3    |
| PROBNO | 1    |

F2 - Acquisition Parameters

|         |                |
|---------|----------------|
| Date_   | 20051028       |
| Time    | 19.56          |
| INSTRUM | spect          |
| PROBHD  | 5 mm QNP 1H    |
| PULPROG | zg             |
| TD      | 16384          |
| SOLVENT | CDCl3          |
| NS      | 4              |
| DS      | 0              |
| SMH     | 4807.692 Hz    |
| FIDRES  | 0.293438 Hz    |
| AQ      | 1.7039650 sec  |
| RG      | 25.4           |
| DW      | 104.000 usec   |
| DE      | 6.00 usec      |
| TE      | 300.0 K        |
| D1      | 2.00000000 sec |

==== CHANNEL f1 =====

|      |                 |
|------|-----------------|
| NUC1 | 1H              |
| P1   | 10.50 usec      |
| PL1  | 0.00 dB         |
| SFO1 | 400.1320007 MHz |

F2 - Processing parameters

|     |                 |
|-----|-----------------|
| SF  | 400.1300087 MHz |
| WDW | EM              |
| SSB | 0               |
| LB  | 0.30 Hz         |
| GB  | 0               |
| PC  | 1.00            |

1D NMR plot parameters

|       |                 |
|-------|-----------------|
| CX    | 20.00 cm        |
| FAP   | 10.000 ppm      |
| F1    | 4001.30 Hz      |
| F2P   | 0.000 ppm       |
| F2    | 0.00 Hz         |
| PPMCM | 0.50000 ppm/cm  |
| HZCM  | 200.06500 Hz/cm |

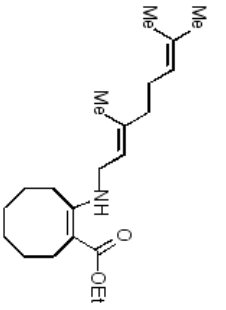

24

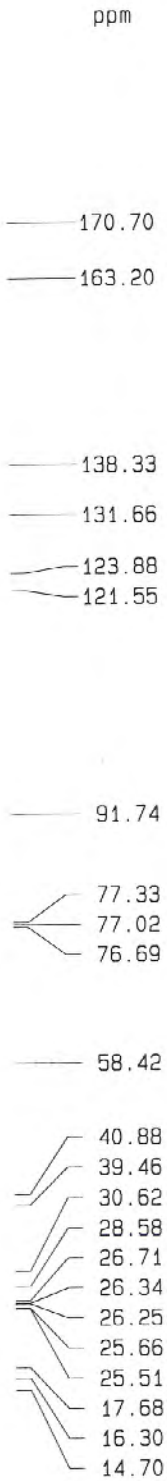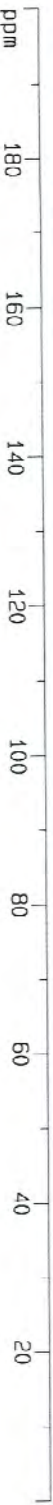

Current Date Parameters  
 NAME A4B2  
 EXPNO 4  
 PROCNO 1

F2 - Acquisition Parameters  
 Date\_ 20061028  
 Time 20.00  
 INSTRUM spect  
 PROBD 5 mm QNP 1H  
 PULPROG zgpg  
 TD 121208  
 SOLVENT CDCl3  
 NS 101  
 DS 0  
 SMH 30303.031 Hz  
 FIDRES 0.250008 Hz  
 AQ 1.9999820 sec  
 RG 2048  
 DM 16.500 usec  
 DE 7.50 usec  
 TE 300.0 K  
 D1 3.00000000 sec  
 d11 0.03000000 sec

CHANNEL f1  
 NUC1 13C  
 P1 11.00 usec  
 PL1 -2.00 dB  
 SF01 100.6258087 MHz

CHANNEL f2  
 CPDPRG2 waltz16  
 NUC2 1H  
 PCPRG2 101.00 usec  
 PL2 120.00 dB  
 PL12 19.00 dB  
 SF02 400.1324710 MHz

F2 - Processing parameters  
 SI 16384  
 SF 100.6127717 MHz  
 WDM EM  
 SSB 0  
 LB 1.00 Hz  
 GB 0  
 PC 1.00

1D NMR plot parameters  
 CX 20.00 cm  
 F1P 200.000 ppm  
 F1 20122.55 Hz  
 F2P 0.000 ppm  
 F2 0.00 Hz  
 PPNMCM 10.00000 ppm/cm  
 HZCM 1005.12769 Hz/cm

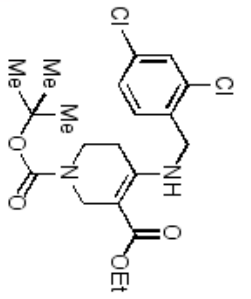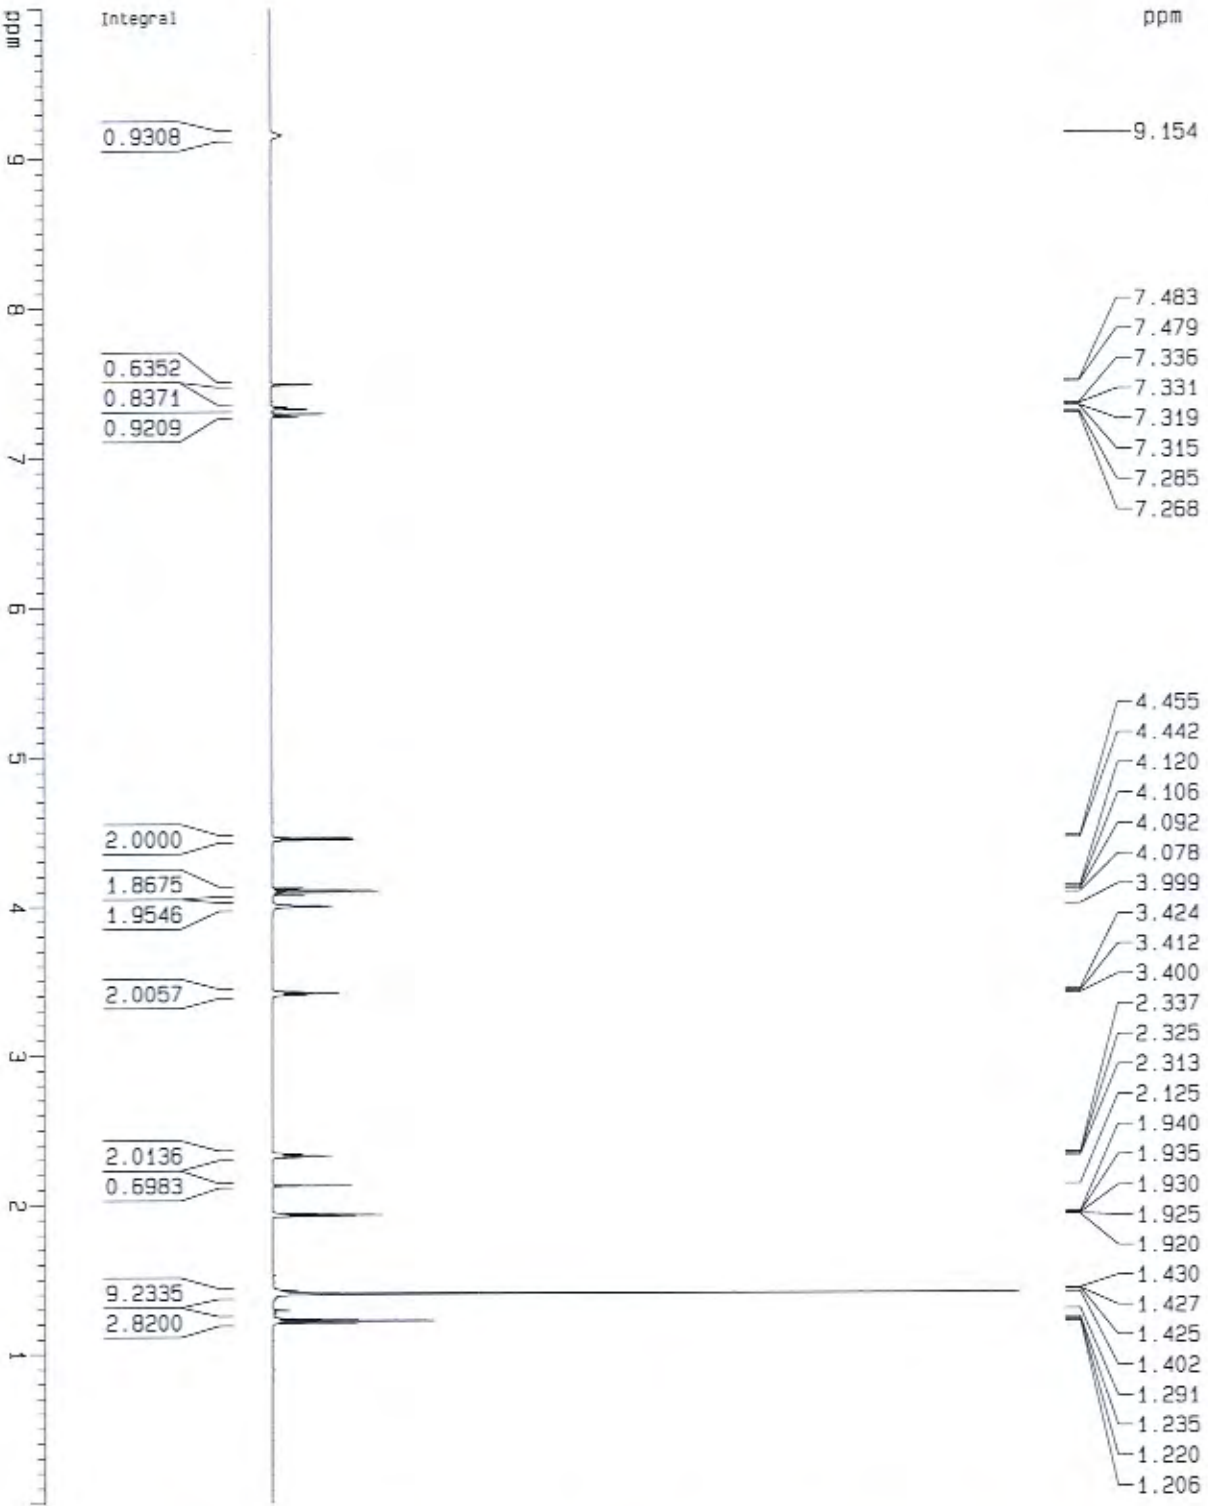

Current Data Parameters  
 NAME AS95  
 EXPNO 3  
 PROCNO 1

F2 - Acquisition Parameters  
 Date\_ 20051029  
 Time 21.38  
 INSTRUM spect  
 PROBHD 5 mm QNP 1H  
 PULPROG zg  
 TO 32768  
 SOLVENT CD3CN  
 NS 4  
 DS 0  
 SMH 6009.615 Hz  
 FIDRES 0.18399 Hz  
 AQ 2.7263477 sec  
 RG 64  
 DM 83.200 usec  
 DE 4.50 usec  
 TE 300.0 K  
 D1 2.00000000 sec

\*\*\*\*\* CHANNEL f1 \*\*\*\*\*  
 NUC1 1H  
 P1 10.00 usec  
 PL1 -1.00 dB  
 SF01 500.1325006 MHz

F2 - Processing parameters  
 SI 16384  
 SF 500.1300209 MHz  
 WDW EM  
 SSB 0  
 LB 0.30 Hz  
 GB 0  
 PC 1.00

1D NMR plot parameters  
 CX 20.00 cm  
 F1P 10.000 ppm  
 F1 5001.30 Hz  
 F2P 0.000 ppm  
 F2 0.00 Hz  
 PPMQCM 0.50000 ppm/cm  
 HZCM 250.08502 Hz/cm



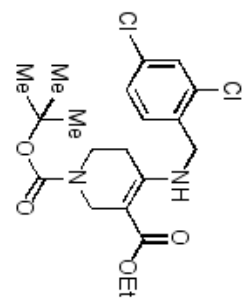

**27**

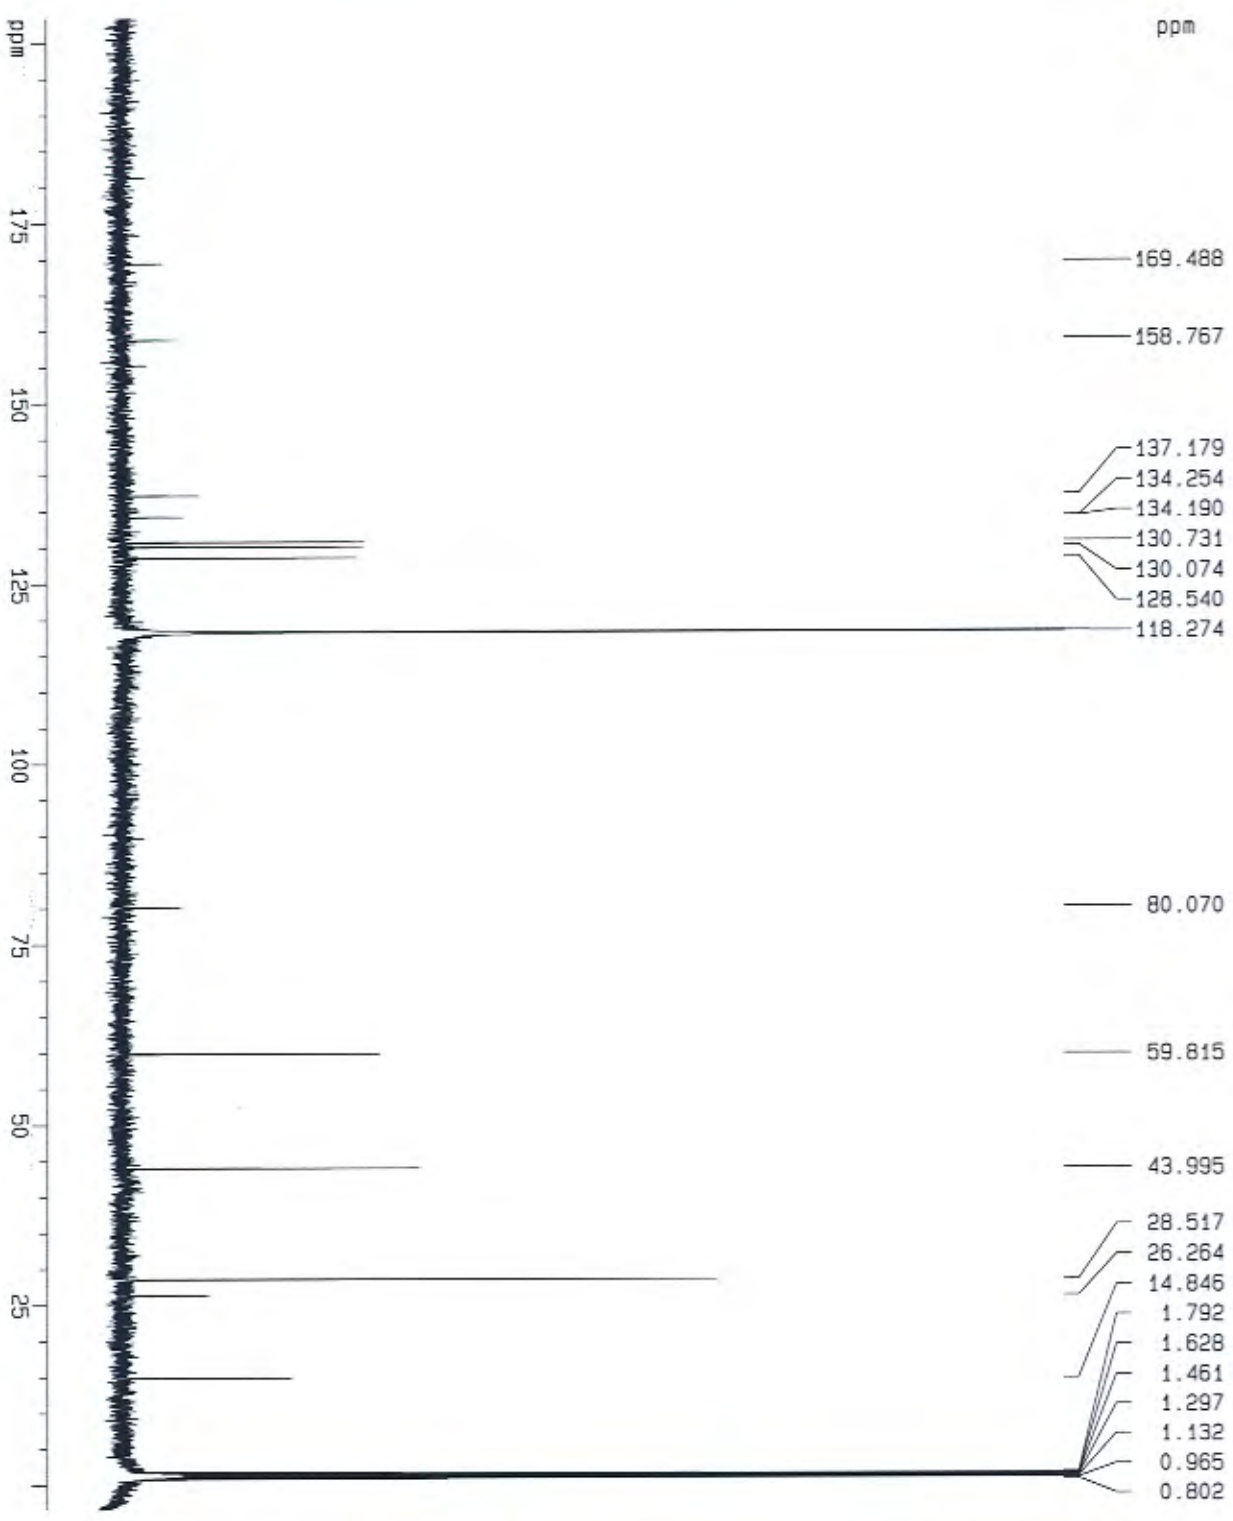

Current Data Parameters  
 NAME AS86  
 EXPNO 4  
 PROCNO 1

F2 - Acquisition Parameters  
 Date\_ 20061029  
 Time 21.46

INSTNUM spect  
 PROBHD 5 mm BBO 1H  
 PULPROG zgpg

TD 112780  
 SOLVENT CDCl3  
 NS 184

DS 0  
 SH1 31446.541 Hz  
 FIDRES 0.278831 Hz

AQ 1.7932520 sec  
 RG 1024

DM 15.900 usec  
 DE 7.50 usec  
 TE 300.0 K

D1 4.00000000 sec  
 D11 0.03000000 sec

----- CHANNEL f1 -----  
 NUC1 13C  
 P1 8.00 usec  
 PL1 3.00 dB

SFO1 125.7728299 MHz

----- CHANNEL f2 -----  
 CPDPRG2 waltz16  
 NUC2 1H  
 P2 90.00 usec  
 PL2 120.00 dB

PL12 19.00 dB  
 SFO2 500.1338000 MHz

F2 - Processing parameters  
 SI 32768  
 SF 125.7576677 MHz

MDM EM  
 SSB 0  
 LB 1.00 Hz  
 GB 0  
 PC 1.40

1D NMR plot parameters  
 CX 20.00 cm  
 F1P 203.363 ppm  
 F1 25574.97 Hz

F2P -3.357 ppm  
 F2 -422.23 Hz  
 PPMCK 10.33623 ppm/cm  
 HZCM 1299.85974 Hz/cm

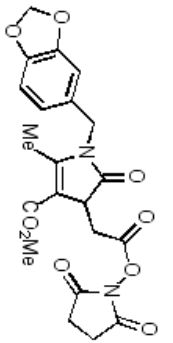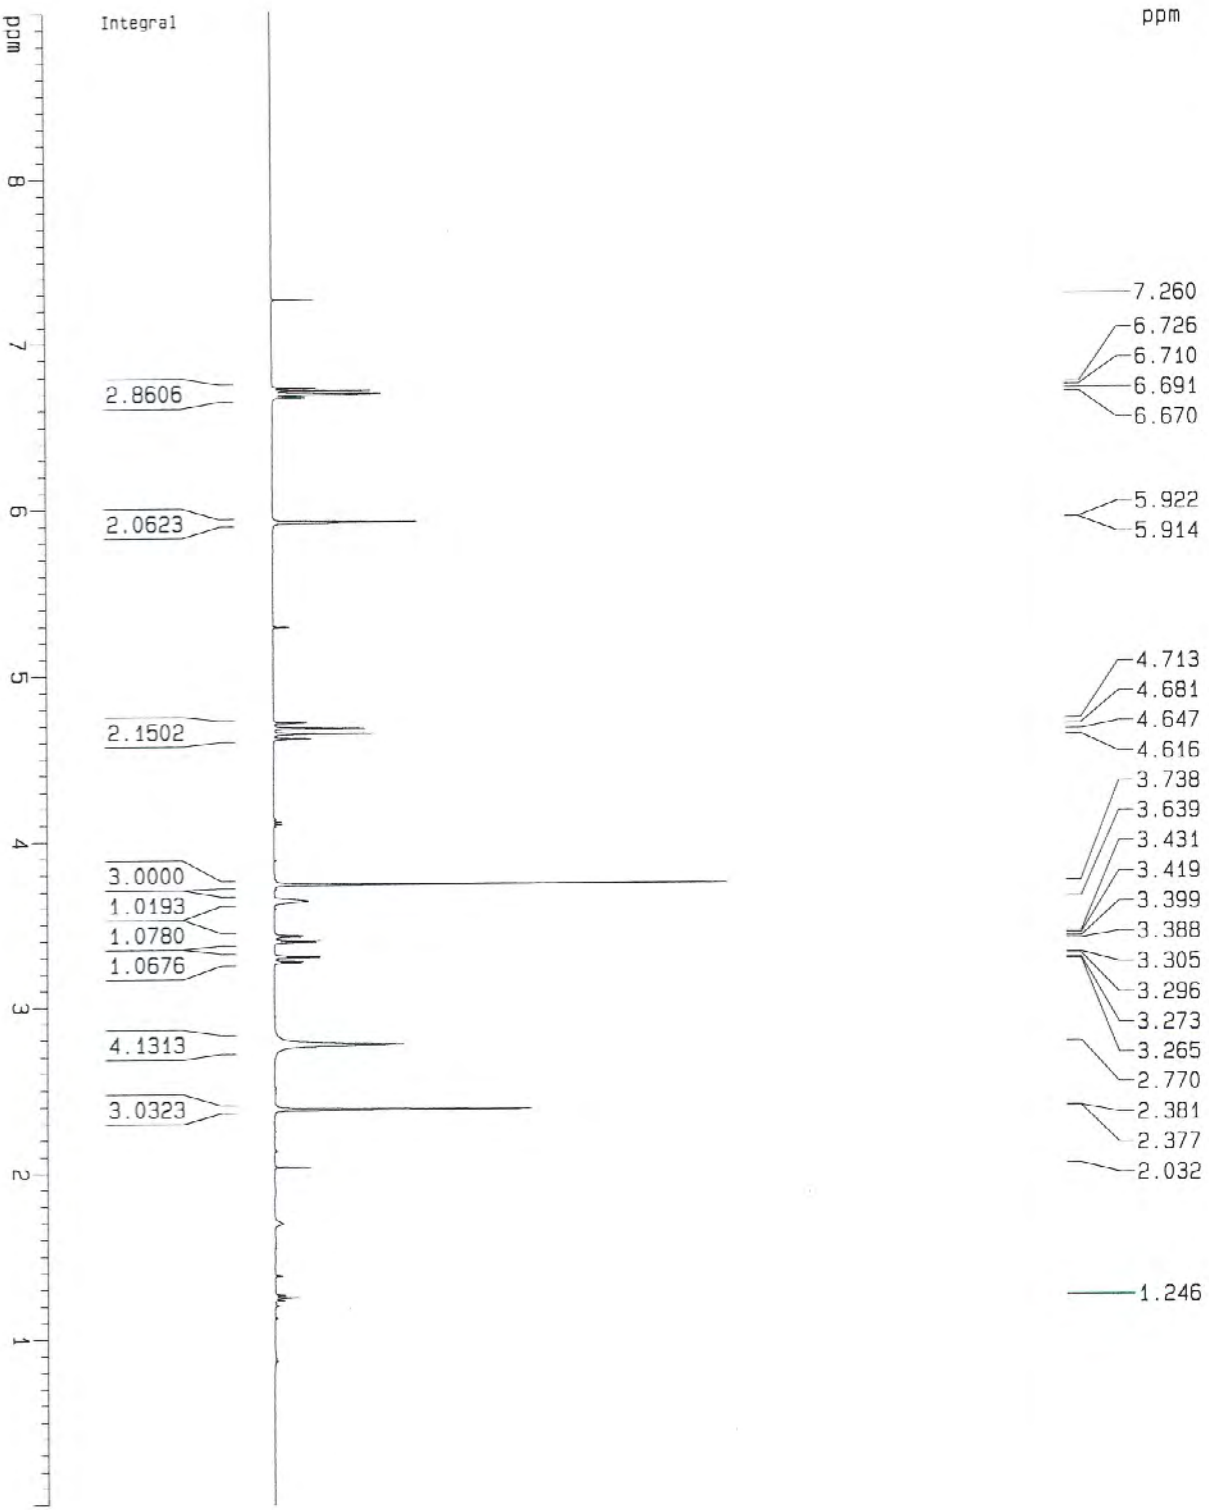

Current Data Parameters  
 NAME A1B5-Hofa  
 EXPNO 1  
 PROCNO 1

F2 - Acquisition Parameters  
 Date\_ 20061031  
 Time 16.10  
 INSTRUM spect  
 PROBHD 5 mm QNP 1H  
 PULPROG zg  
 TD 32768  
 SOLVENT CDCl3  
 NS 4  
 DS 0  
 SWH 5208.333 Hz  
 FIDRES 0.158946 Hz  
 AQ 3.1457779 sec  
 RG 32  
 DW 96.000 usec  
 DE 4.50 usec  
 TE 300.0 K  
 D1 2.00000000 sec

===== CHANNEL f1 =====  
 NUC1 1H  
 P1 10.00 usec  
 PL1 -1.00 dB  
 SFO1 500.132018 MHz

F2 - Processing parameters  
 SI 16384  
 SF 500.130042 MHz  
 MDW EM  
 SSB 0  
 LB 0.30 Hz  
 GB 0  
 PC 1.00

1D NMR plot parameters  
 CX 20.00 cm  
 F1P 9.000 ppm  
 F1 4501.17 Hz  
 F2P 0.000 ppm  
 F2 0.00 Hz  
 PPMCKM 0.45000 ppm/cm  
 HZCM 225.05850 Hz/cm

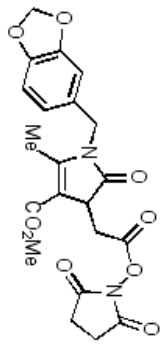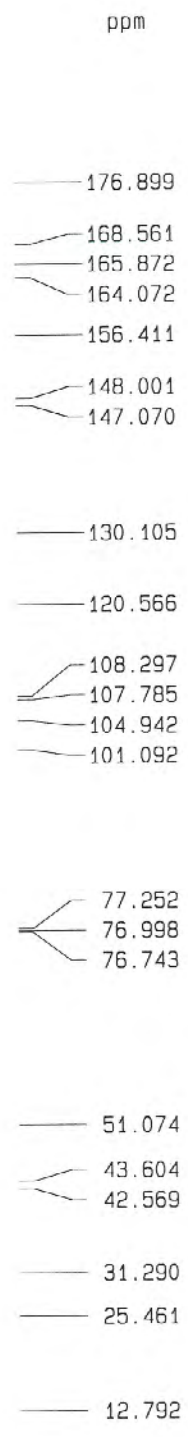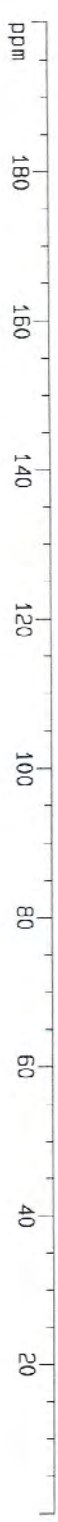

Current Data Parameters  
 NAME A1B5  
 EXPNO 2  
 PROCNO 1

F2 - Acquisition Parameters  
 Date\_ 20061031  
 Time 16.15  
 INSTRUM spect  
 PROCNO 5 mm QNP 1H  
 PULPROG zgpg  
 TD 112780  
 SOLVENT CDCl3  
 NS 74  
 DS 0  
 SWH 31445.541 Hz  
 FIDRES 0.278831 Hz  
 AQ 1.7932520 sec  
 RG 1024  
 DM 15.590 usec  
 DE 7.50 usec  
 TE 300.0 K  
 D1 4.00000000 sec  
 d11 0.03000030 sec

CHANNEL f1  
 NUC1 13C  
 P1 8.00 usec  
 PL1 3.00 dB  
 SF01 125.7728299 MHz

CHANNEL f2  
 CPDPRG2 waltz16  
 NUC2 1H  
 P2 90.00 usec  
 PL2 120.00 dB  
 PL12 19.00 dB  
 SF02 500.1338000 MHz

F2 - Processing parameters  
 SI 32768  
 SF 125.7577964 MHz  
 MDW EN  
 SSB 0  
 LB 1.00 Hz  
 GB 0  
 PC 1.40

1D NMR pict parameters  
 CX 20.00 cm  
 F1P 200.000 ppm  
 F1 25151.56 Hz  
 F2P 0.000 ppm  
 F2 0.00 Hz  
 PPMCKM 10.00000 ppm/cm  
 HZCM 1257.57800 Hz/cm

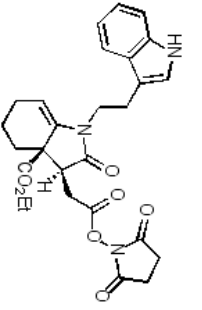

29

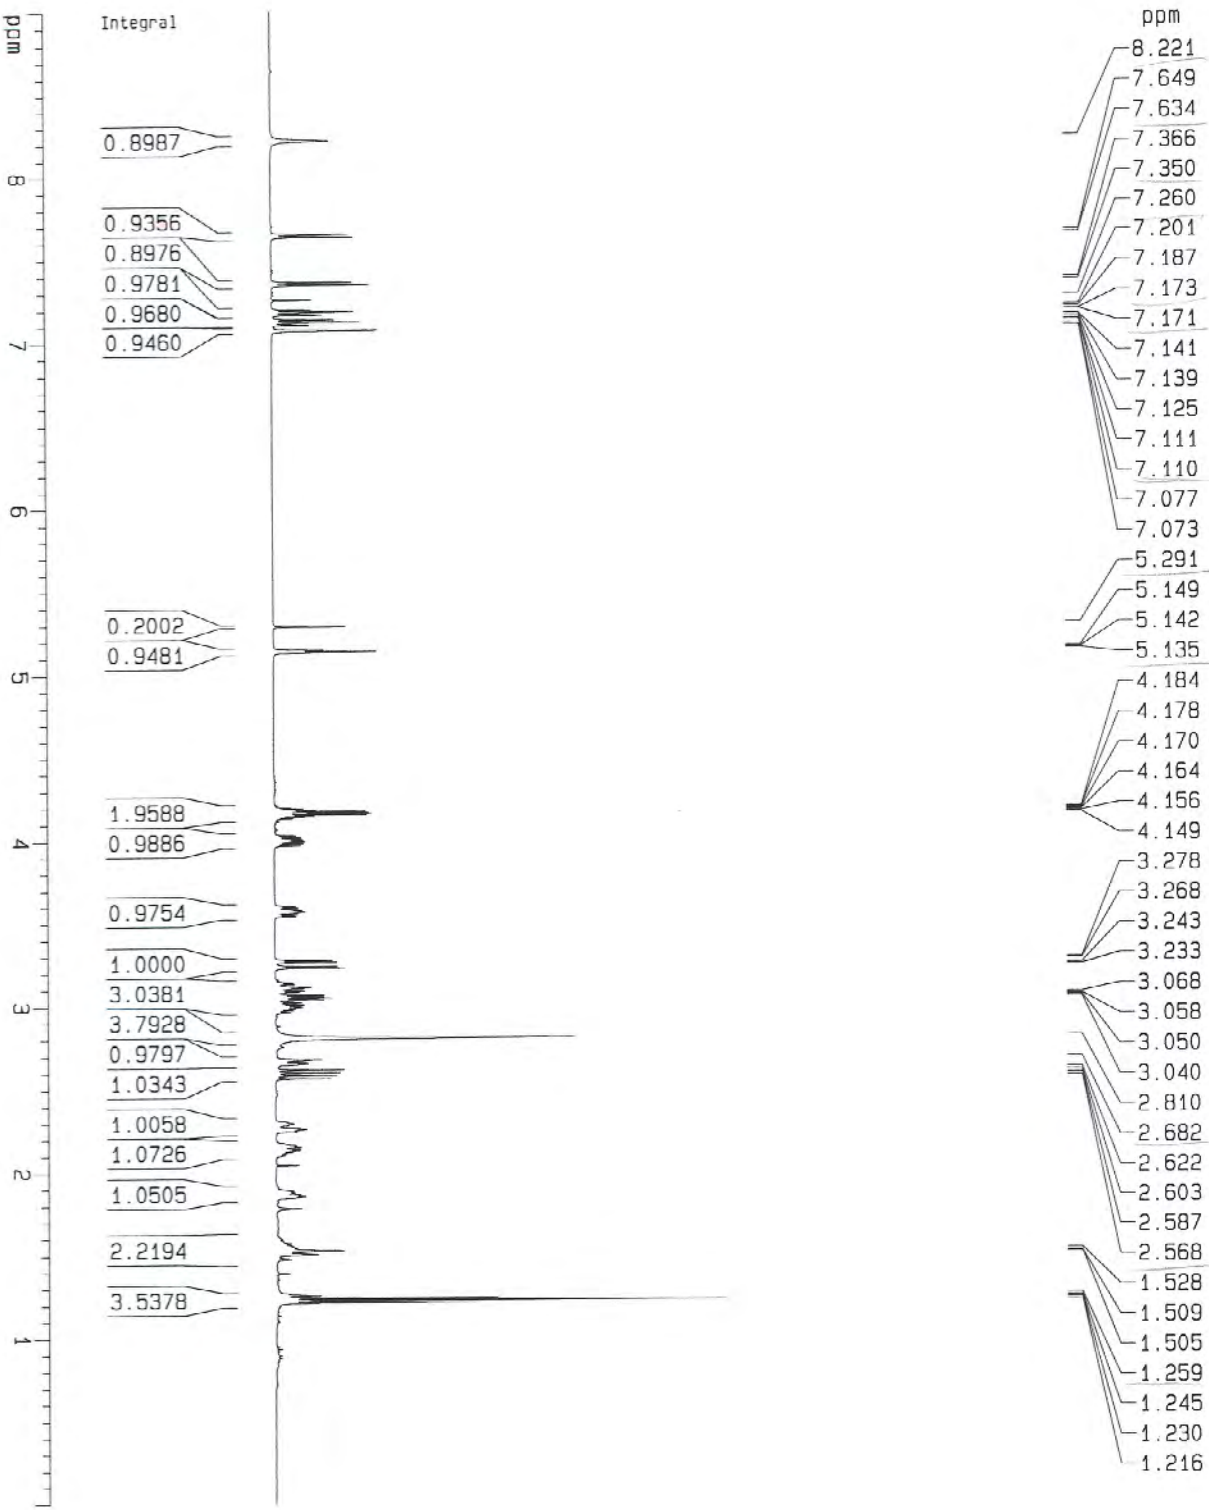

Current Data Parameters  
 NAME A2B7-H1014  
 EXNO 6  
 PROCDNO 1

F2 - Acquisition Parameters  
 Date\_ 20051030  
 Time 10.15  
 INSTRUM spect  
 PROCHD 5 mm QNP 1H  
 PULPROG zg  
 TD 32768  
 SOLVENT CDCl3  
 NS 4  
 DS 0  
 SMH 5208.333 Hz  
 FIDRES 0.153946 Hz  
 AQ 3.1457779 sec  
 RG 32  
 DW 96.000 usec  
 DE 4.50 usec  
 TE 300.0 K  
 D1 2.00000000 sec

===== CHANNEL f1 =====  
 NUC1 1H  
 P1 10.00 usec  
 PL1 -1.00 dB  
 SF01 500.1320118 MHz

F2 - Processing parameters  
 SI 16384  
 SF 500.130145 MHz  
 MDW EM  
 SSB 0  
 LB 0.30 Hz  
 GB 0  
 PC 1.00

1D NMR plot parameters  
 CX 20.00 cm  
 F1P 5.000 ppm  
 F1 4501.17 Hz  
 F2P 0.000 ppm  
 F2 0.00 Hz  
 PPMCK 0.45000 ppm/cm  
 HZCM 225.05850 Hz/cm

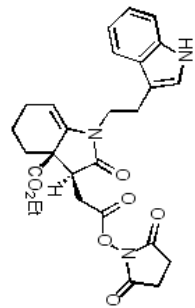

29

ppm

- 171.325
- 171.222
- 168.795
- 167.376
- 138.005
- 136.194
- 127.289
- 121.970
- 119.307
- 118.574
- 112.655
- 111.187
- 100.998
- 77.251
- 76.996
- 76.741
- 61.547
- 52.321
- 47.277
- 40.835
- 30.572
- 28.580
- 25.510
- 22.747
- 22.358
- 19.600
- 14.044

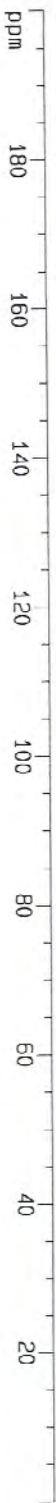

Current Data Parameters

NAME A2B7  
EXRNO 7  
PROCNO 1

F2 - Acquisition Parameters

Date\_ 20061030  
Time 10.21  
INSTRUM spect  
PROCNO 5 mm QNP 1H  
PULPROG zgpg  
TD 112780  
SOLVENT CDCl3  
NS 63  
DS 0  
SMH 31445.541 Hz  
FIDRES 0.278931 Hz  
AQ 1.7932520 sec  
RG 1024  
DM 15.900 usec  
DE 7.50 usec  
TE 300.0 K  
D1 4.00000000 sec  
D11 0.03000000 sec

CHANNEL f1

NUC1 13C  
P1 8.00 usec  
PL1 3.00 dB  
SFO1 125.7728299 MHz

CHANNEL f2

CPDPRG2 waltz16  
NUC2 1H  
PCPD2 90.00 usec  
PL2 120.00 dB  
PL12 19.00 dB  
SFO2 500.1338000 MHz

F2 - Processing parameters

SI 32768  
SF 125.7578002 MHz  
WDW EM  
SSB 0  
LB 1.00 Hz  
GB 0  
PC 1.40

10 NMR plot parameters

CX 20.00 cm  
F4P 200.000 ppm  
F1 25151.56 Hz  
F2P 0.000 ppm  
F2 0.00 Hz  
PPMCM 10.00000 ppm/cm  
HZCM 1257.57800 Hz/cm

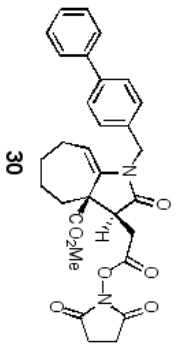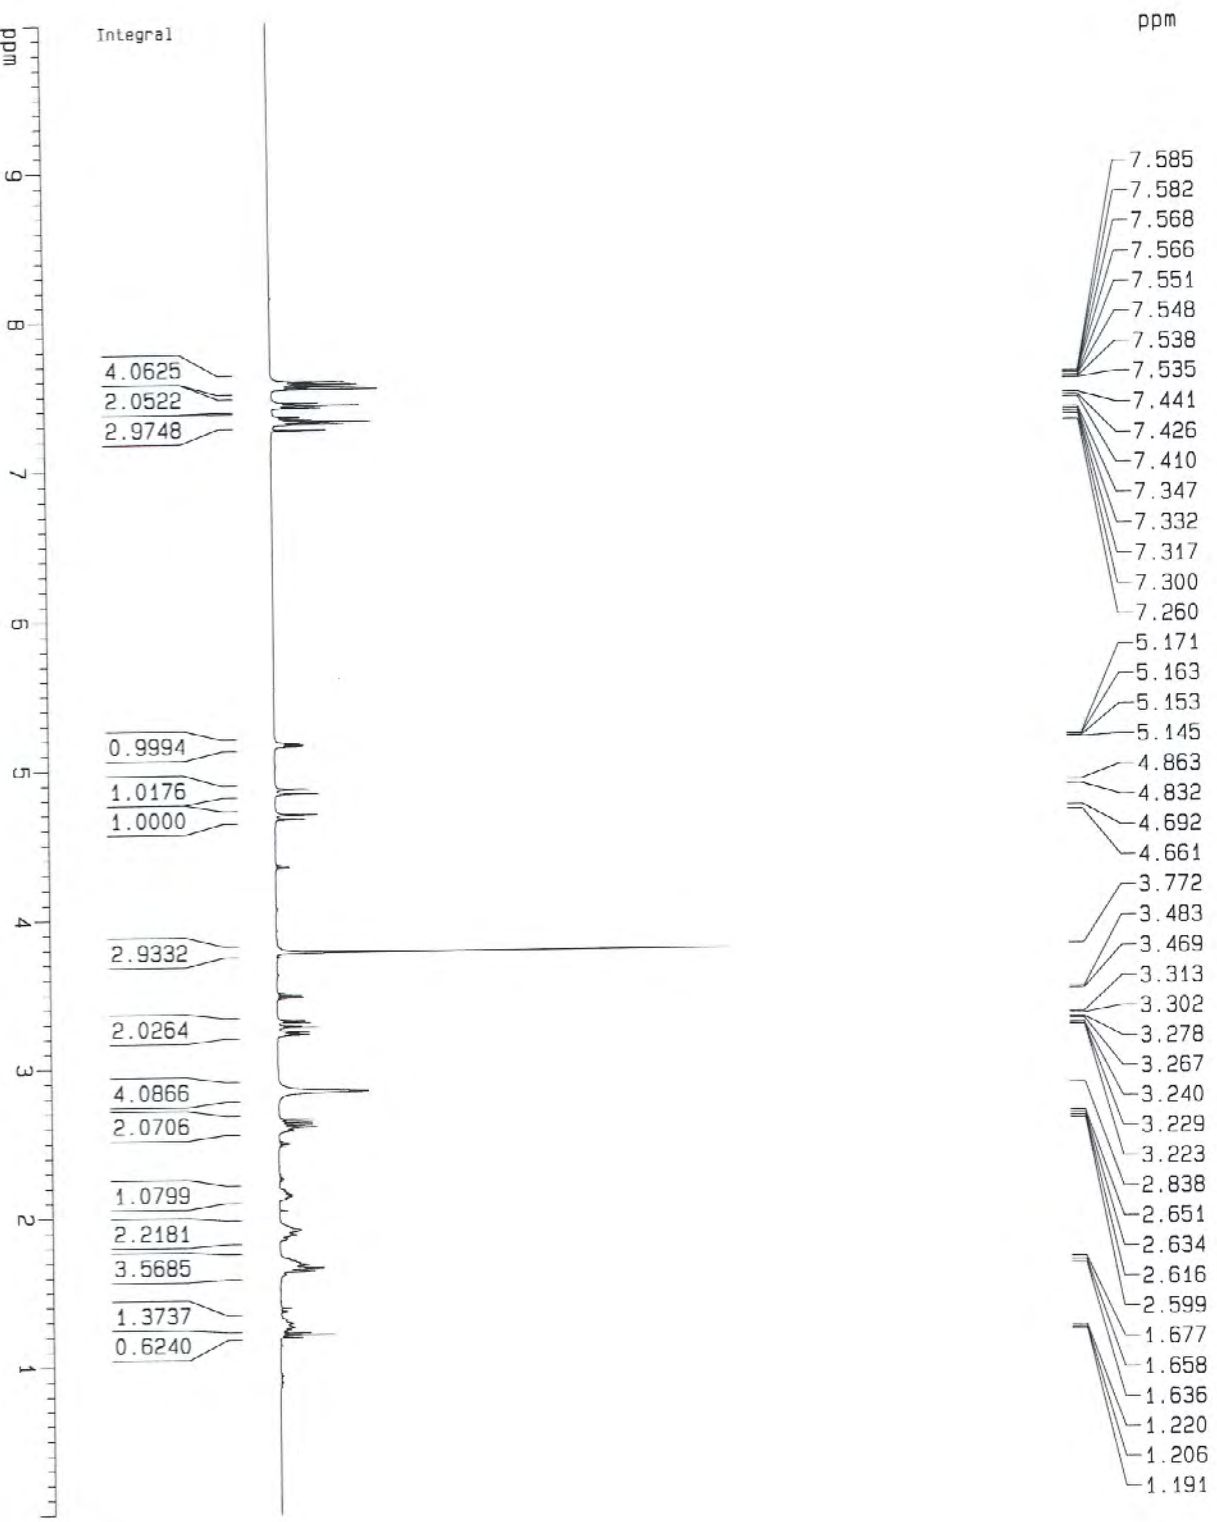

Current Data Parameters  
 NAME A394-H05J  
 EXPNO 1  
 PROCNO 1

F2 - Acquisition Parameters  
 Date\_ 20061025  
 Time 15.26  
 INSTRUM spect  
 PULPROG 5 mm Multinu  
 TD 29  
 FIDRES 0.229114 Hz  
 AG 2.1823989 sec  
 RG 57  
 DW 66.600 usec  
 DE 4.50 usec  
 TE 300.0 K  
 D1 3.00000000 sec

===== CHANNEL f1 =====  
 NUC1 1H  
 P1 5.60 usec  
 PL1 0.00 dB  
 SF=01 500.1322000 MHz

F2 - Processing parameters  
 SI 16384  
 SF 500.1300139 MHz  
 MDW EM  
 SSB 0  
 LB 0.30 Hz  
 GB 0  
 PC 1.00

1D NMR plot parameters  
 CX 20.00 cm  
 F4P 10.000 ppm  
 F1 5001.30 Hz  
 F2P 0.000 ppm  
 F2 0.00 Hz  
 PPKCM 0.50000 ppm/cm  
 HZCM 250.05500 Hz/cm

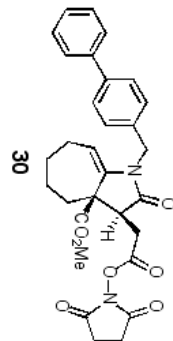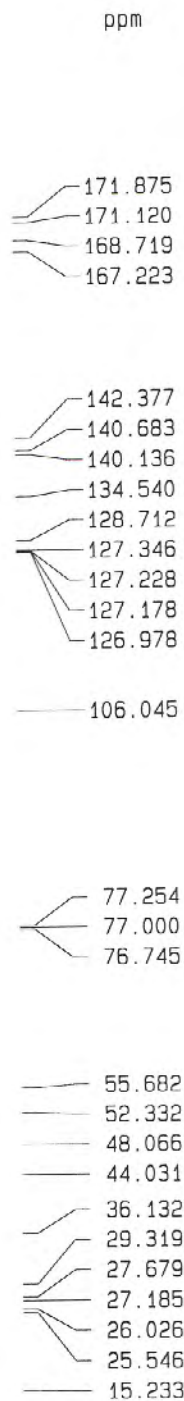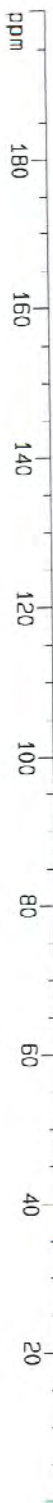

Current Data Parameters  
 NAME A3B4-HCSu  
 EXPNO 2  
 PROCNO 1

F2 - Acquisition Parameters

Date\_ 20061025  
 Time 15.29  
 INSTRUM spect  
 PROBHD 5 mm Multinu  
 PULPROG zgpg  
 TD 211264  
 SOLVENT CCl3  
 NS 105  
 DS 1  
 SM 35211.270 Hz  
 FIDRES 0.166670 Hz  
 AQ 2.9999988 sec  
 RG 9195.2  
 DW 14.200 usec  
 DE 4.50 usec  
 TE 300.0 K  
 D1 3.00000000 sec  
 d11 0.03000000 sec

===== CHANNEL f1 =====

NUC1 13C  
 P1 10.50 usec  
 PL1 -3.00 dB  
 SFO1 125.7736214 MHz

===== CHANNEL f2 =====

CPDPRG2 waltz16  
 NUC2 1H  
 PCPD2 100.00 usec  
 PL2 120.00 dB  
 PL12 28.00 dB  
 SFO2 500.1317628 MHz

F2 - Processing parameters

SI 32768  
 SF 125.7577970 MHz  
 MDM EK  
 SSB 0  
 LB 1.00 Hz  
 GB 0  
 PC 1.40

10 NMR plot parameters

CX 20.00 cm  
 F1P 200.000 ppm  
 F1 25151.55 Hz  
 F2P 0.000 ppm  
 F2 0.09 Hz  
 PRFMCN 10.00000 ppm/cm  
 HZCM 1257.57800 Hz/cm

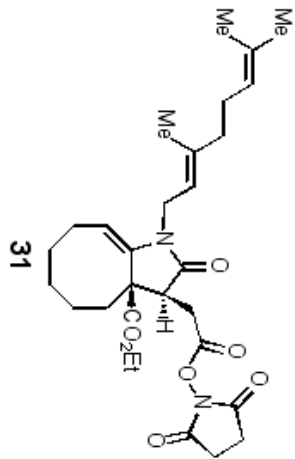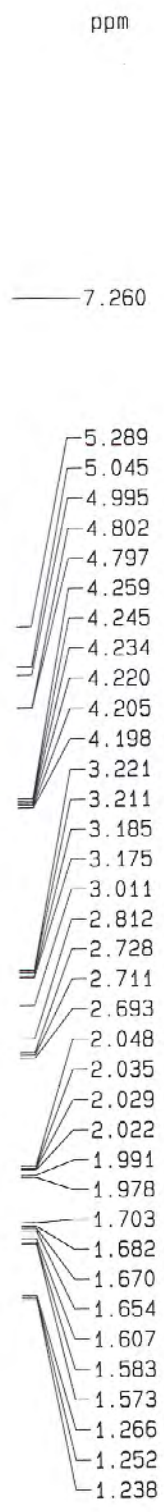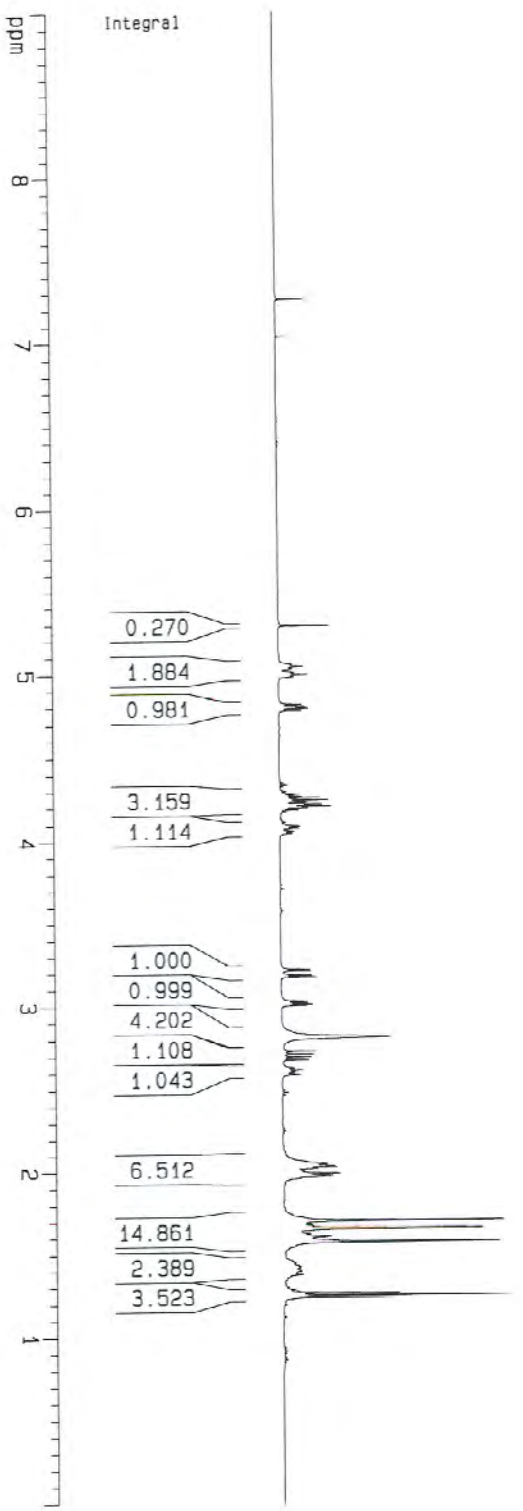

Current Data Parameters  
NAME A4B2-H0S0  
EXNO 1  
PROCNO 1

F2 - Acquisition Parameters  
Date\_ 20061026  
Time 15.53  
INSTRUM spect  
PROBHD 5 mm Multinu  
PULPROG zg  
TD 32768  
SOLVENT CDCl3  
NS 4  
DS 0  
SWH 7507.507 Hz  
FIDRES 0.229411 Hz  
AQ 2.1823988 sec  
RG 29.5  
DM 56.600 usec  
DE 4.50 usec  
TE 300.0 K  
D1 3.00000000 sec

===== CHANNEL f1 =====  
NUC1 1H  
P1 5.60 usec  
PL1 0.00 dB  
SF01 500.1322000 MHz

F2 - Processing parameters  
SI 15384  
SF 500.1300138 MHz  
WDW EM  
SSB 0  
LB 0.30 Hz  
GB 0  
PC 1.00

1D NMR plot parameters  
CX 20.00 cm  
F1P 9.000 ppm  
F1 4501.17 Hz  
F2P 0.000 ppm  
F2 0.00 Hz  
PRNCK 0.45000 ppm/cm  
HZCM 225.05950 Hz/cm



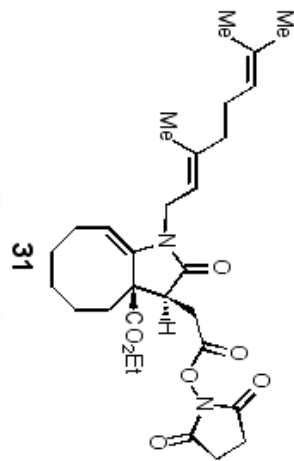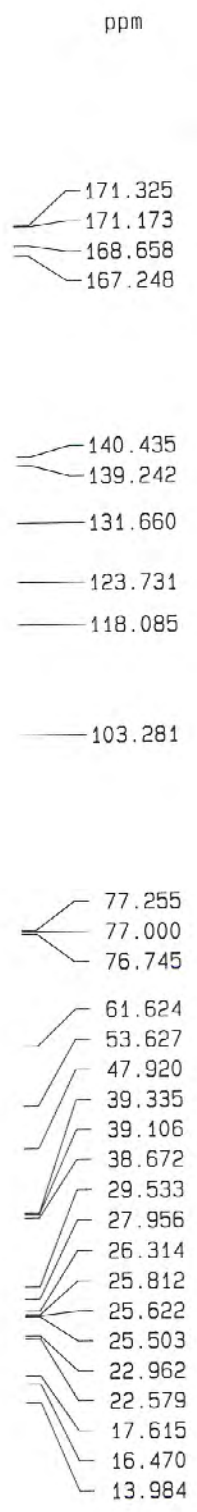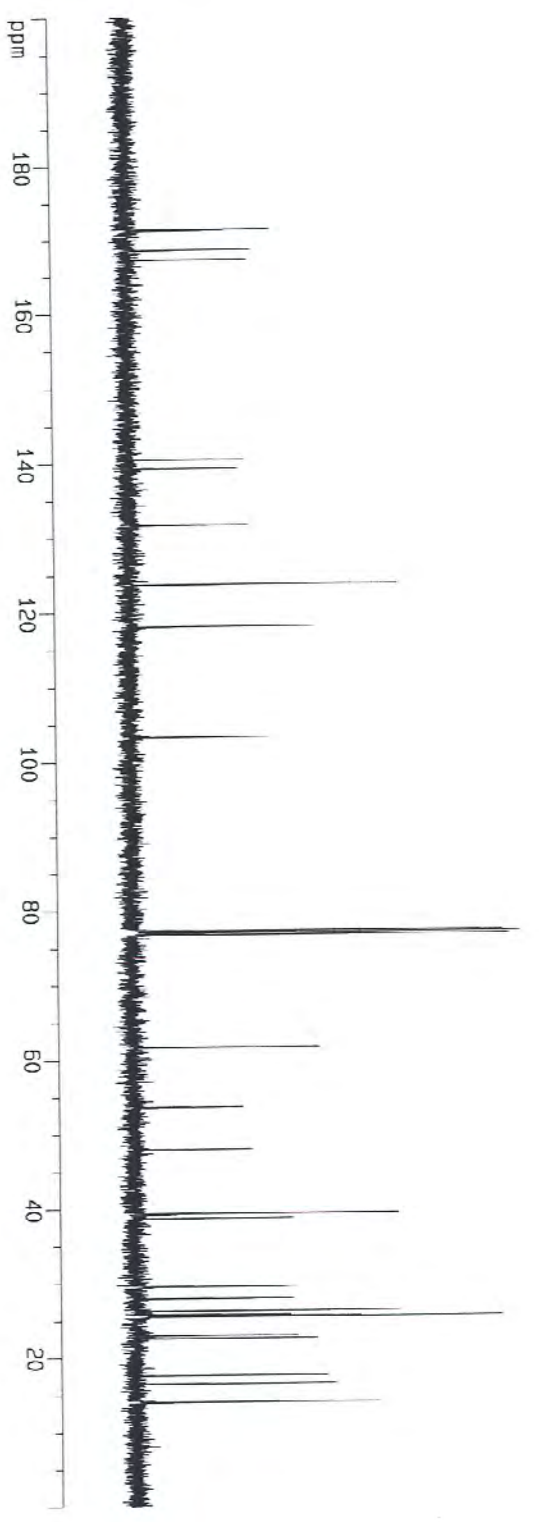

Current Data Parameters  
 NAME AAB2-H05u  
 EXPNO 2  
 PROCNO 1

F2 - Acquisition Parameters  
 Date\_ 20061026  
 Time 15.56  
 INSTRUM spect  
 PROBHD 5 mm Multinu  
 PULPROG zgpg  
 TD 211264  
 SOLVENT CDCl3  
 NS 114  
 DS 1

SWH 35211.270 Hz  
 FIDRES 0.166670 Hz  
 AQ 2.5959588 sec  
 RG 9195.2  
 DM 14.200 usec  
 DE 4.50 usec  
 TE 300.0 K  
 D1 3.00000000 sec  
 d11 0.03000000 sec

===== CHANNEL f1 =====  
 NUC1 13C  
 P1 10.50 usec  
 PL1 -3.00 dB  
 SF01 125.7736214 MHz

===== CHANNEL f2 =====  
 CPDPRG2 waltz16  
 NUC2 1H  
 PGP02 100.00 usec  
 PL2 120.00 dB  
 PL12 28.00 dB  
 SF02 500.1317628 MHz

F2 - Processing parameters  
 S1 32768  
 SF 125.7577970 MHz  
 KDM EM  
 SSB 0  
 LB 1.00 Hz  
 GB 0  
 PC 1.40

1D NMR plot parameters  
 CX 20.00 cm  
 F1P 200.000 DPM  
 F1 25151.56 Hz  
 F2P 0.000 DPM  
 F2 0.00 Hz  
 PPRCM 10.00000 DPM/cm  
 HZCM 1257.57800 Hz/cm

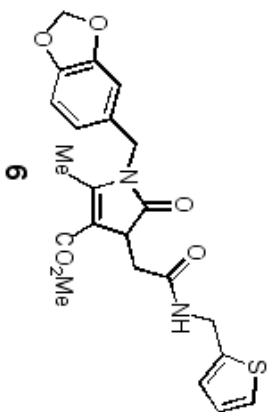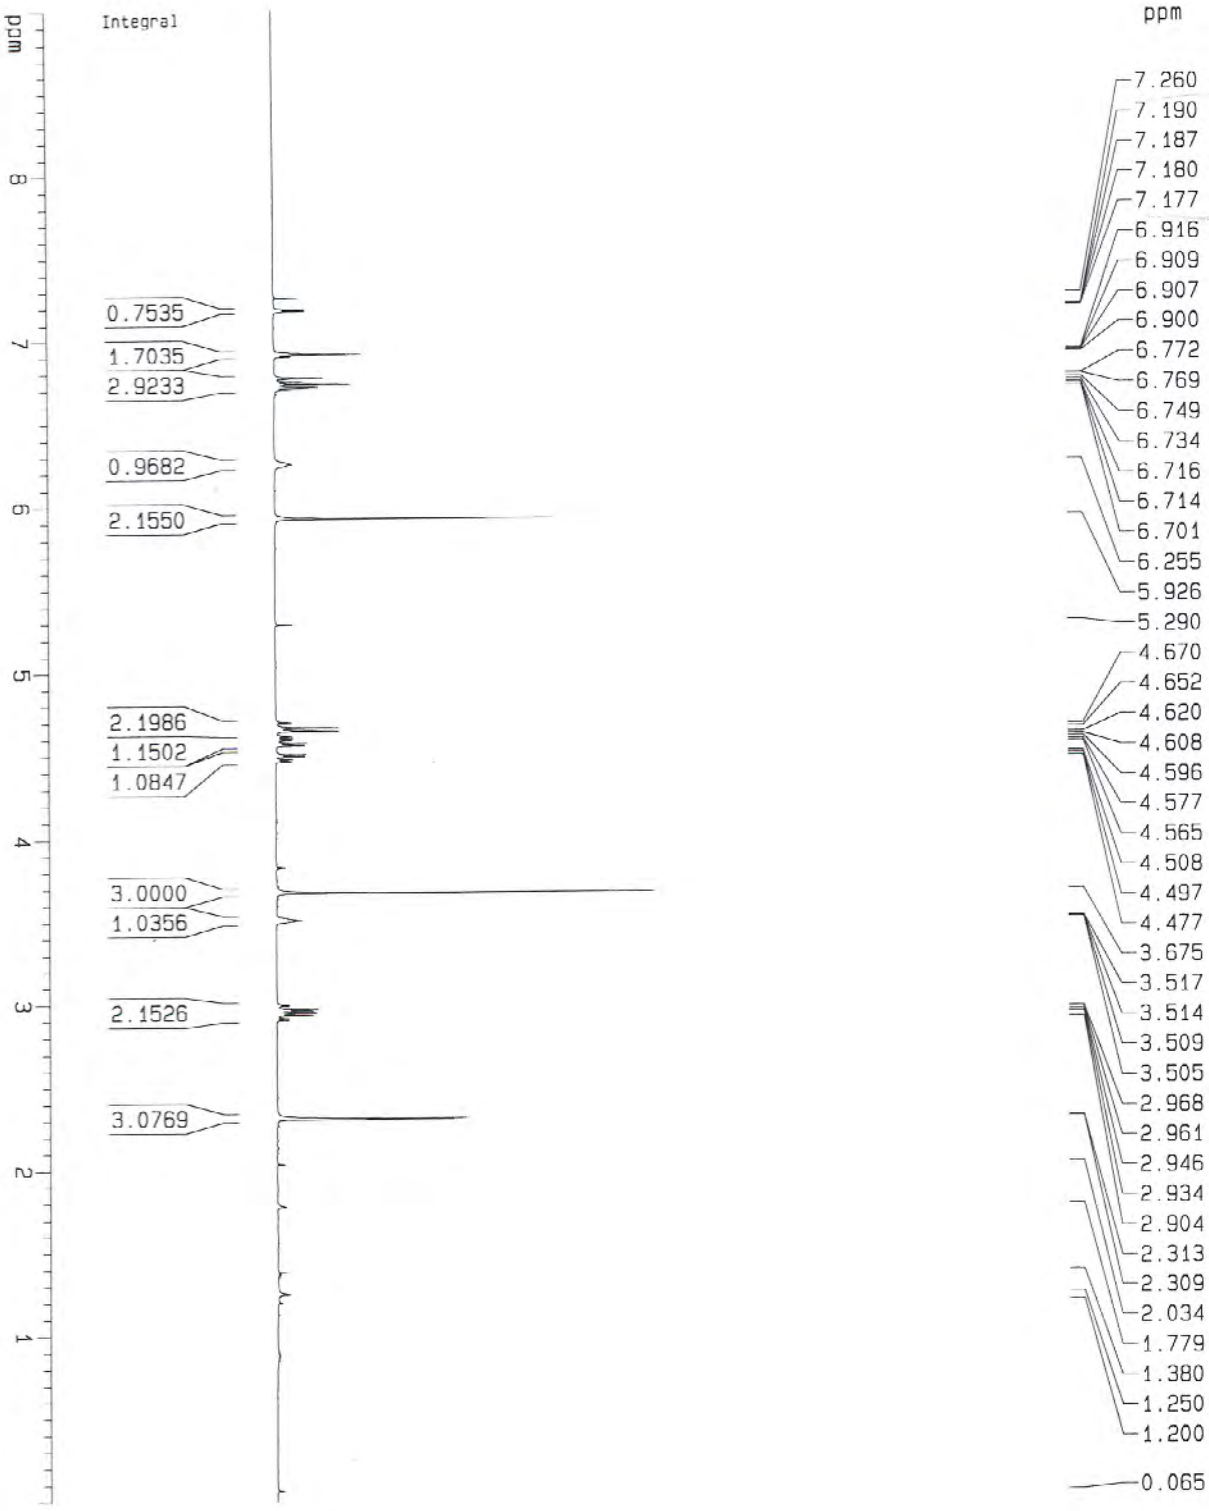

Current Data Parameters  
 NAME A135C5  
 EXPNO 1  
 PROCNO 1

F2 - Acquisition Parameters  
 Date\_ 20061101  
 Time 20.09  
 INSTRUM spect  
 PROBHD 5 mm GVP 1H  
 PULPROG zg  
 TD 32768  
 SOLVENT CDCl3  
 NS 4  
 DS 0  
 SMH 5208.333 Hz  
 FIDRES 0.158546 Hz  
 AQ 3.1457779 sec  
 RG 32  
 DW 95.000 usec  
 DE 4.50 usec  
 TE 300.0 K  
 D1 2.00000000 sec

==== CHANNEL f1 =====  
 NUC1 1H  
 P1 10.00 usec  
 PL1 -1.00 dB  
 SF01 500.1320118 MHz

F2 - Processing parameters  
 SI 15364  
 SF 500.130142 MHz  
 KW EM  
 SSB 0  
 LB 0.30 Hz  
 GB 0  
 PC 1.00

10 NMR plot parameters  
 CX 20.00 cm  
 F1P 9.000 ppm  
 F1 4501.17 Hz  
 F2P 0.000 ppm  
 F2 0.00 Hz  
 PPMCM 0.45000 ppm/cm  
 HZCM 225.05850 Hz/cm

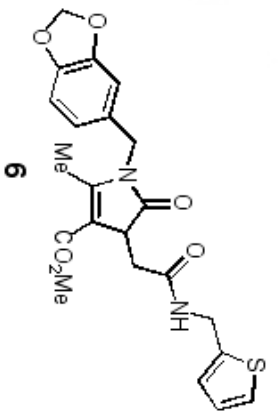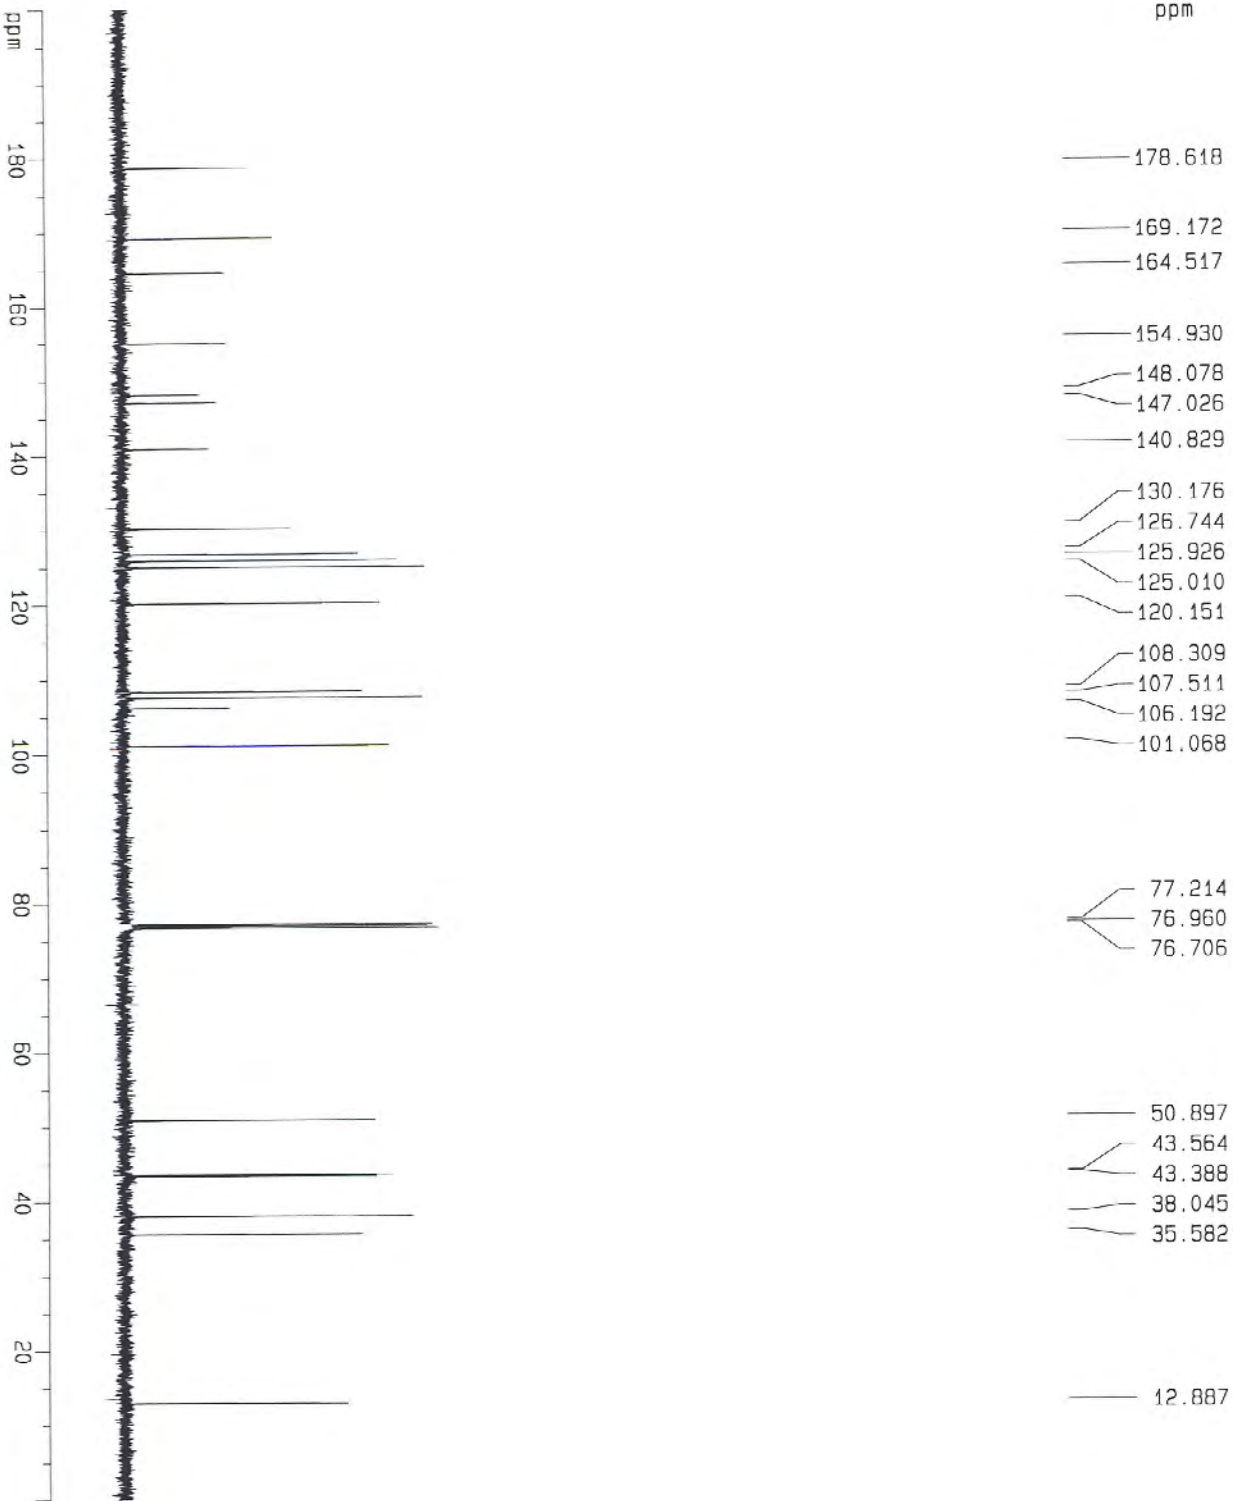

Current Data Parameters  
 NAME A1B5C5  
 EXPNO 2  
 PROCNO 1

F2 - Acquisition Parameters  
 Date\_ 20061101  
 Time 20.13  
 INSTRUM spect  
 PROBHD 5 mm GNP 1H  
 PULPROG zgpg  
 TD 112780  
 SOLVENT CDCl3  
 NS 104  
 DS 0  
 SMH 31446.541 Hz  
 FIDRES 0.278831 Hz  
 AQ 1.7932520 sec  
 RG 2048  
 DW 15.900 usec  
 DE 7.50 usec  
 TE 300.0 K  
 D1 4.00000000 sec  
 D11 0.03000000 sec

===== CHANNEL f1 =====  
 NUC1 13C  
 P1 8.00 usec  
 PL1 3.00 dB  
 SF01 125.7728259 MHz

===== CHANNEL f2 =====  
 CPDPRG2 waltz16  
 NUC2 1H  
 PCPD02 90.00 usec  
 PL2 120.00 dB  
 PL12 19.00 dB  
 SF02 500.1338000 MHz

F2 - Processing parameters  
 SI 32768  
 SF 125.7578019 MHz  
 WDW EM  
 SSB 0  
 LB 1.00 Hz  
 GB 0  
 PC 1.40

1D NMR plot parameters  
 CX 20.00 cm  
 F1P 200.000 ppm  
 F1 25151.56 Hz  
 F2P 0.000 ppm  
 F2 0.00 Hz  
 PPMCM 10.00000 ppm/cm  
 HZCM 1257.57800 Hz/cm

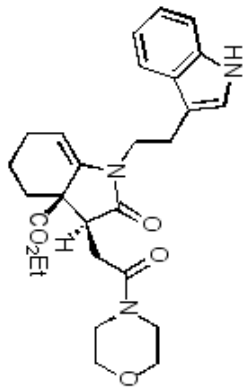

ppm

- 7.665
- 7.650
- 7.364
- 7.348
- 7.189
- 7.142
- 7.127
- 7.076

- 5.115
- 5.108
- 5.101
- 4.103
- 4.088
- 4.074
- 4.060
- 3.697
- 3.677
- 3.663
- 3.445
- 3.329
- 3.322
- 3.313
- 2.902
- 2.893
- 2.869
- 2.860
- 2.605
- 2.269
- 2.252
- 2.235
- 2.218
- 1.547
- 1.203
- 1.189
- 1.174

ppm

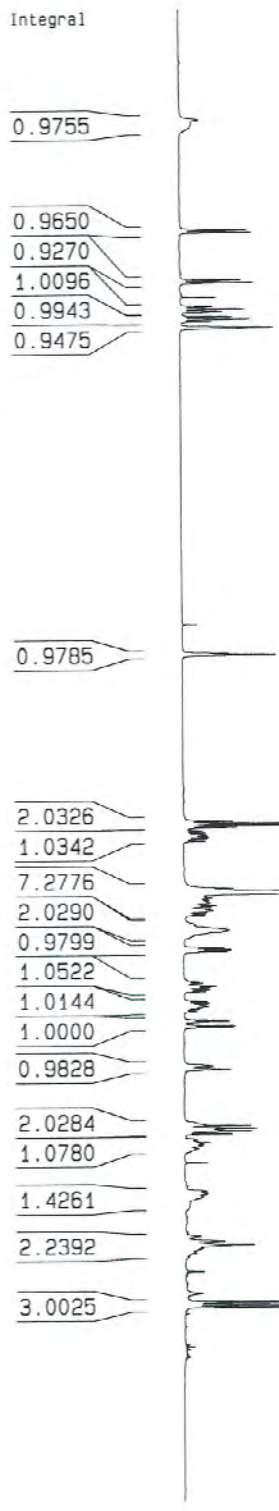

- 0.9755
- 0.9650
- 0.9270
- 1.0096
- 0.9943
- 0.9475

- 0.9785

- 2.0326
- 1.0342
- 7.2776
- 2.0290
- 0.9799
- 1.0522
- 1.0144
- 1.0000
- 0.9828
- 2.0284
- 1.0780
- 1.4261
- 2.2392
- 3.0025

Current Data Parameters

NAME A2B7C9

EXPNO 1

PROCNO 1

F2 - Acquisition Parameters

Date\_ 20061030

Time 20.51

INSTRUM spect

PROBHD 5 mm QNP 1H

PULPROG zg

TD 32768

SOLVENT CDCl3

NS 4

DS 0

SWH 5208.333 Hz

FIDRES 0.158946 Hz

AQ 3.1457779 sec

R6 32

DW 96.000 usec

DE 4.50 usec

TE 300.0 K

TE 2.00000000 sec

==== CHANNEL f1 =====

NUC1 1H

P1 10.00 usec

PL1 -1.00 dB

SFO1 500.1320118 MHz

F2 - Processing parameters

SI 15384

SF 500.1300145 MHz

WDW EM

SSB 0

LB 0.30 Hz

GB 0

PC 1.00

1D NMR plot parameters

CX 20.00 cm

F1p 9.000 DPM

F1 4501.17 Hz

F2p 0.000 DPM

F2 0.00 Hz

PPMCM 0.45000 DPM/cm

HZCM 225.05650 HZ/cm

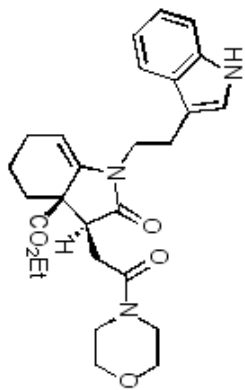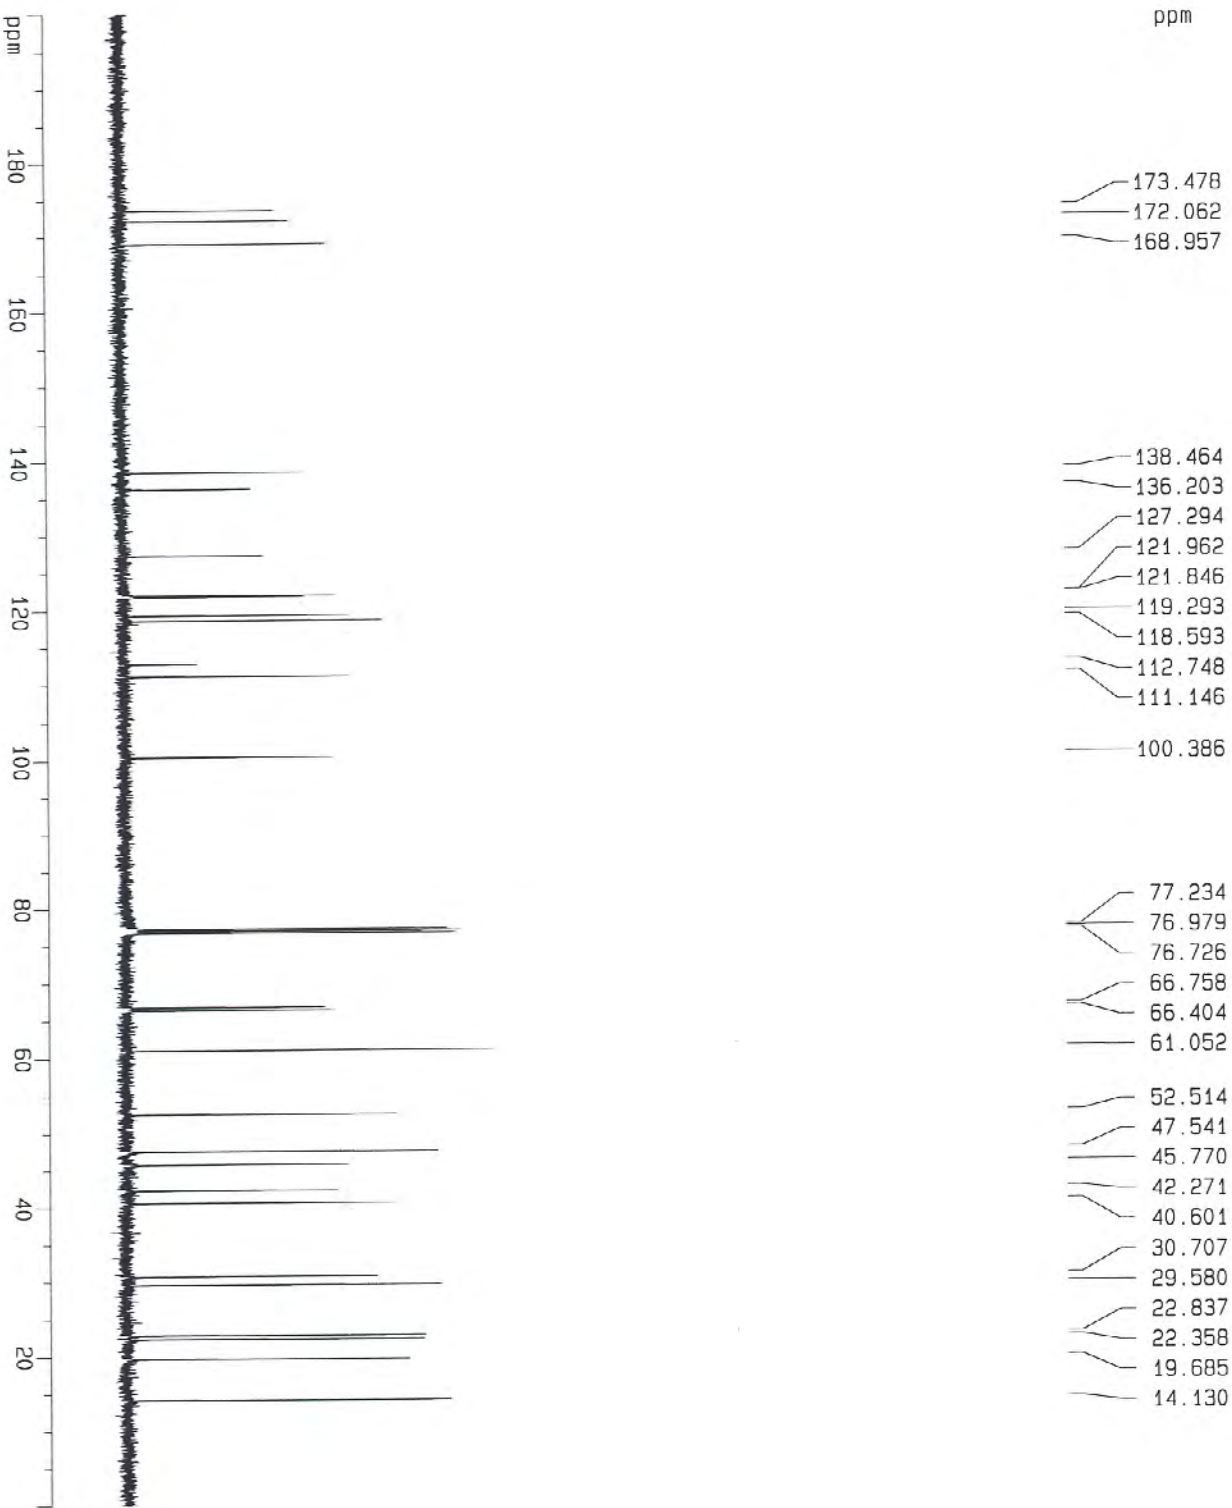

Current Data Parameters  
NAME A2B7C9  
EXPNO 2  
PROCNO 1

F2 - Acquisition Parameters

Date\_ 20061030  
Time 20.56  
INSTRUM spect  
PROBHD 5 mm GNP 1H  
PULPROG zgpg30  
TD 112780  
SOLVENT CDCl3  
NS 146  
DS 0  
SMH 31446.541 Hz  
FIDRES 0.278831 Hz  
AQ 1.7932520 sec  
RG 2049  
DE 15.900 usec  
TE 300.0 K  
D1 4.00000000 sec  
D11 0.03000000 sec

===== CHANNEL f1 =====

NUC1 13C  
P1 8.00 usec  
PL1 3.00 dB  
SF01 125.7728299 MHz

===== CHANNEL f2 =====

CPDPRG2 waltz16  
NUC2 1H  
PCPD2 90.00 usec  
PL2 120.00 dB  
PL12 19.00 dB  
SF02 500.1338000 MHz

F2 - Processing parameters

SI 32768  
SF 125.7578019 MHz  
WDW EN  
SSB 0  
LB 1.00 Hz  
GB 0  
PC 1.40

1D NMR plot parameters

CX 20.00 cm  
F1P 200.000 ppm  
F1 25151.56 Hz  
F2P 0.000 ppm  
F2 0.00 Hz  
PPMCM 10.00000 ppm/cm  
HZCM 1257.57800 Hz/cm

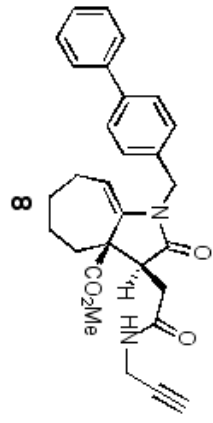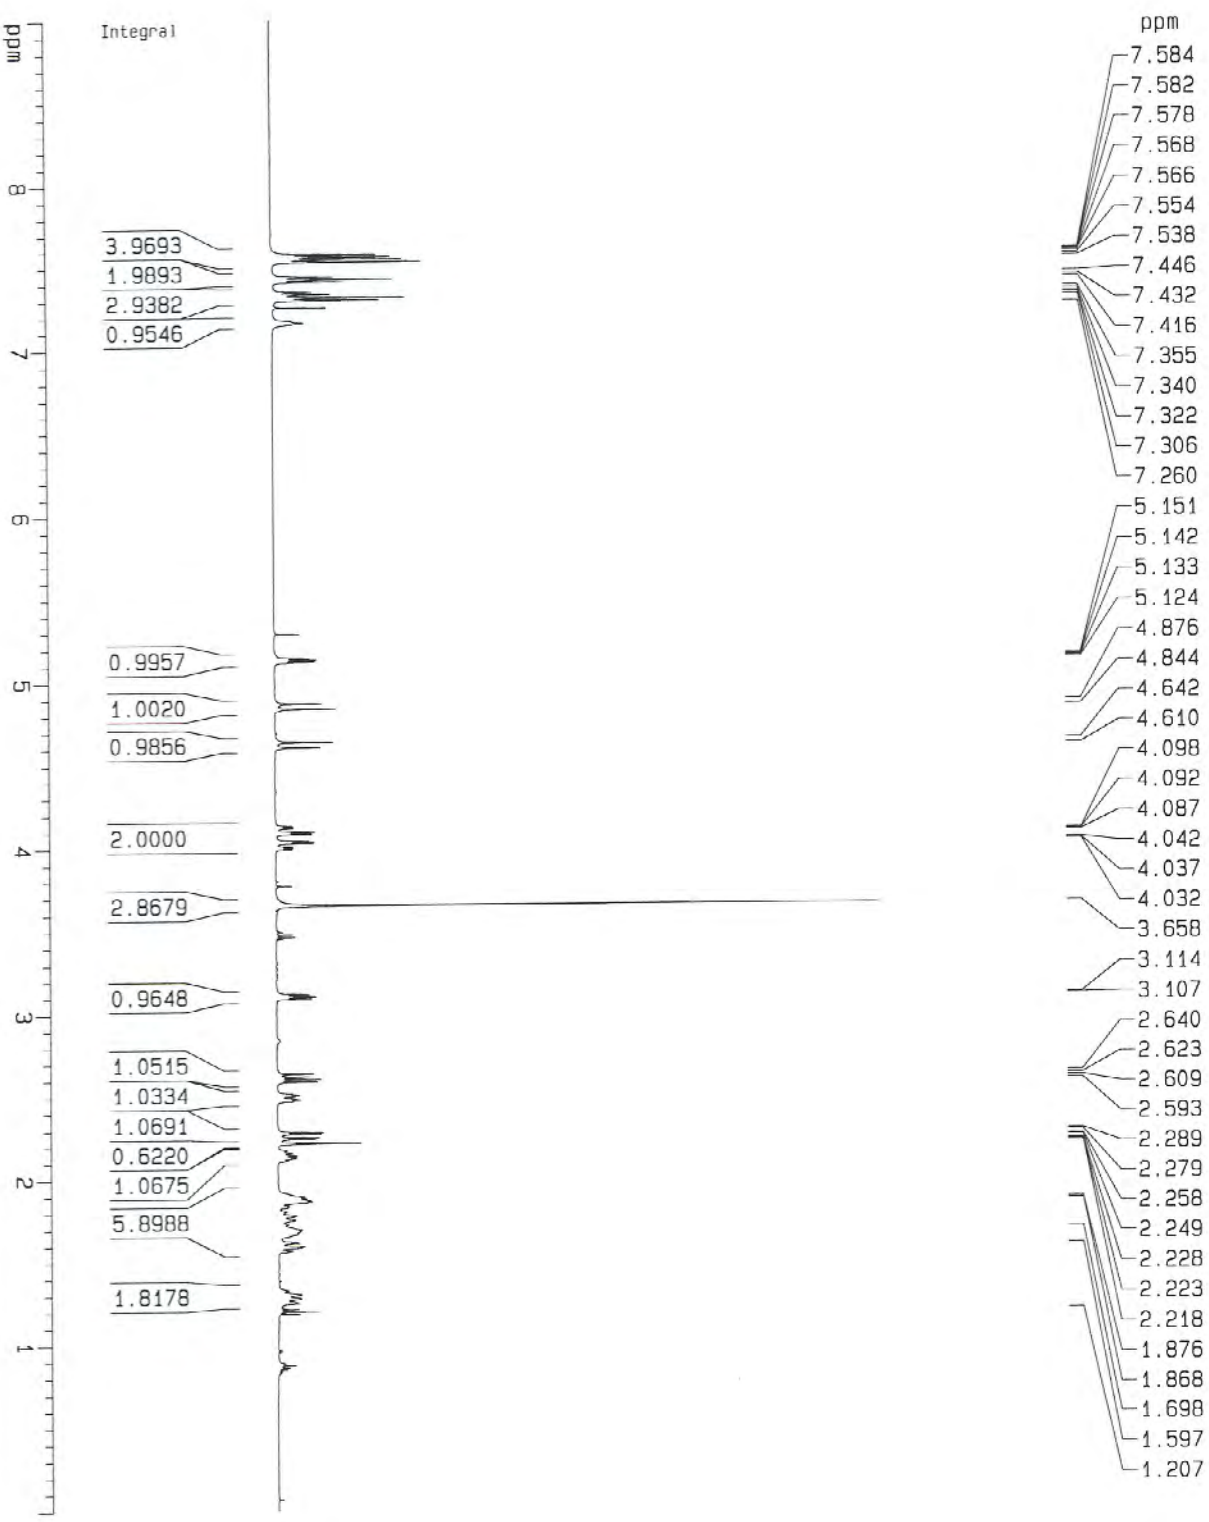

Current Data Parameters  
 NAME A8B4C1  
 EXNO 1  
 PRONNO 1

F2 - Acquisition Parameters  
 Date\_ 20061026  
 Time 11.42  
 INSTRUM spect  
 PROBHD 5 mm Multinu  
 PULPROG zg  
 TD 32768  
 SOLVENT CDCl3  
 NS 4  
 DS 0  
 SMH 7507.507 Hz  
 FIDRES 0.229111 Hz  
 AG 2.1823988 sec  
 RG 50.8  
 DW 66.600 usec  
 DE 4.50 usec  
 TE 300.0 K  
 D1 3.0000000 sec

===== CHANNEL f1 =====  
 NUCL1 1H  
 P1 5.60 usec  
 PL1 0.00 dB  
 SFO1 500.1322000 MHz

F2 - Processing parameters  
 SI 16384  
 SF 500.130138 MHz  
 WDM EM  
 SSB 0  
 LB 0.30 Hz  
 GB 0  
 PC 1.00

1D NMR plot parameters  
 CX 20.00 cm  
 F1P 5.000 ppm  
 F1 4501.17 Hz  
 F2P 0.000 ppm  
 F2 0.00 Hz  
 PPKCM 0.45000 ppm/cm  
 HZCM 225.05950 Hz/cm

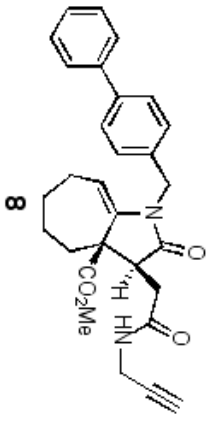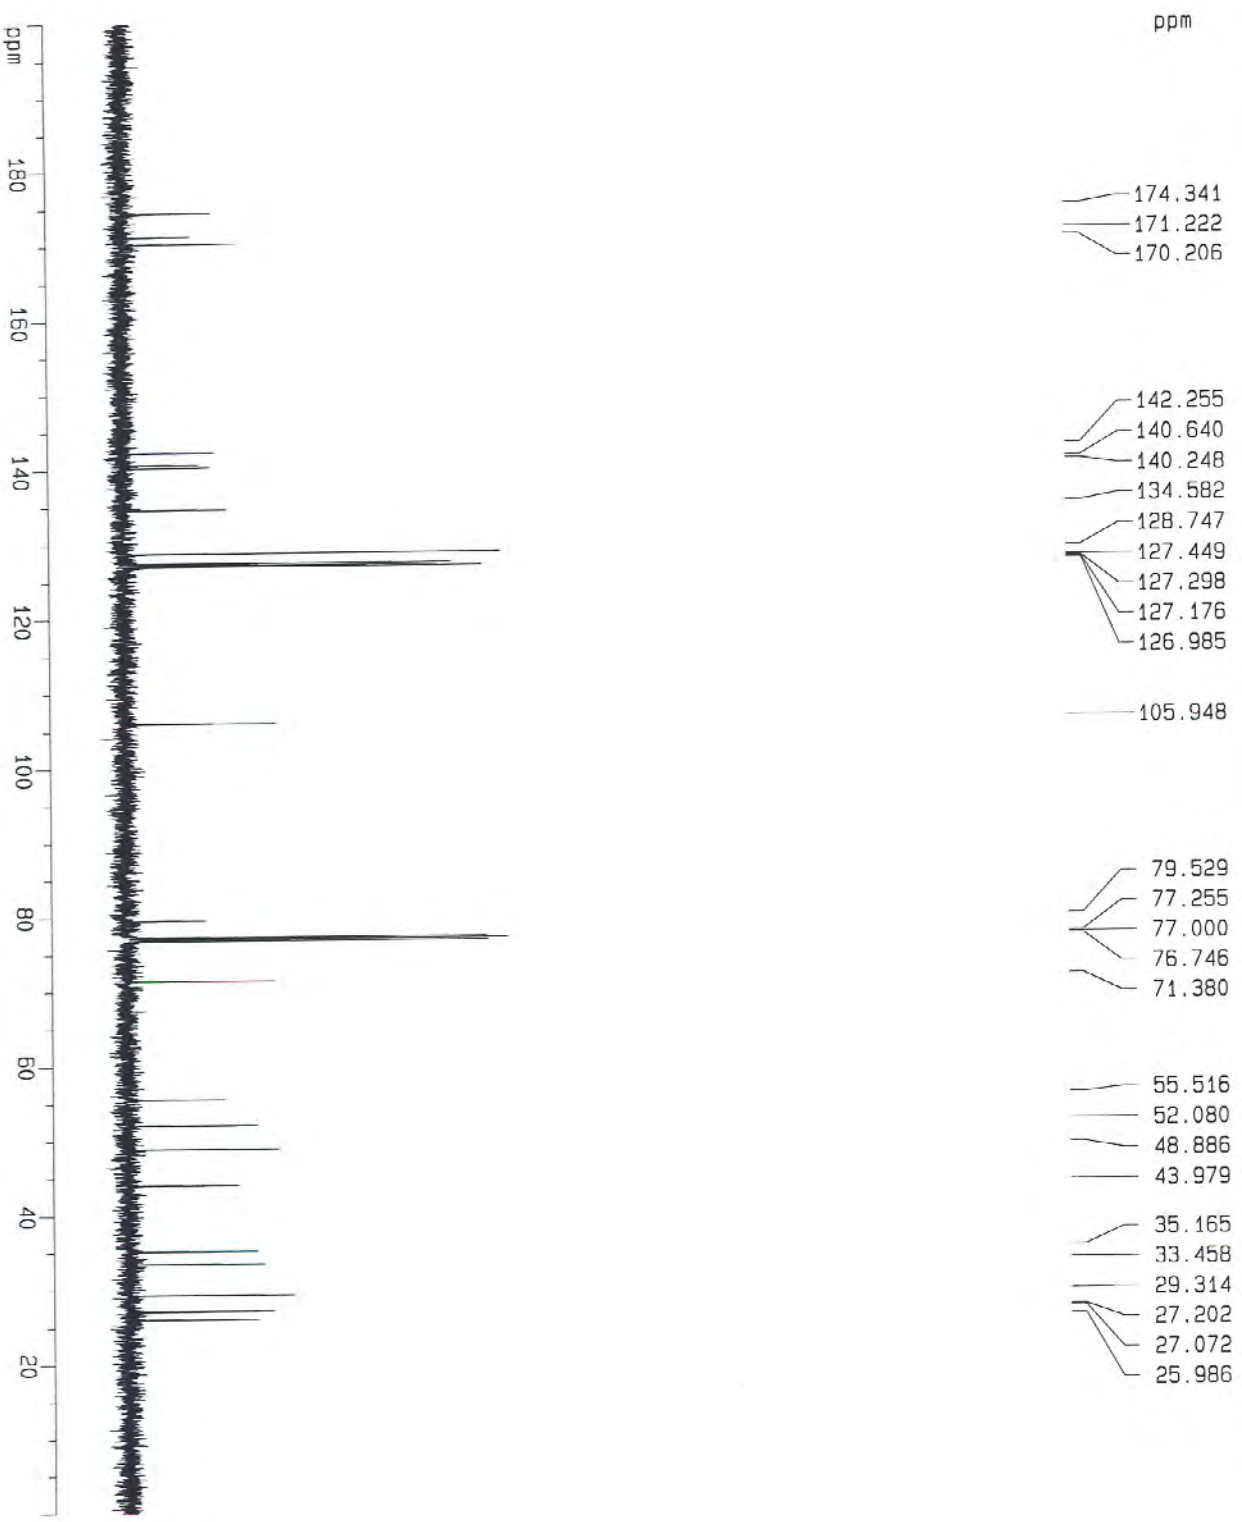

- 174.341
- 171.222
- 170.206
- 142.255
- 140.640
- 140.248
- 134.582
- 128.747
- 127.449
- 127.298
- 127.176
- 126.985
- 105.948
- 79.529
- 77.255
- 77.000
- 76.746
- 71.380
- 55.516
- 52.080
- 48.886
- 43.979
- 35.165
- 33.458
- 29.314
- 27.202
- 27.072
- 25.986

Current Data Parameters

NAME A3B4C1  
EXPNO 2  
PROCNO 1

F2 - Acquisition Parameters

Date\_ 20061026  
Time 11.46  
INSTRUM spect  
PROBHD 5 mm Multinu  
PULPROG zgpg  
TD 211264  
SOLVENT CDCl3  
NS 106  
DS 1  
SMH 35211.270 Hz  
FIDRES 0.166670 Hz  
AQ 2.9999988 sec  
RG 9195.2  
DW 14.200 usec  
DE 4.50 usec  
TE 300.0 K  
D1 3.0000000 sec  
d11 0.0300000 sec

CHANNEL f1

NUC1 13C  
P1 10.50 usec  
PL1 -3.00 dB  
SF01 125.7735274 MHz

CHANNEL f2

CPDPRG2 waltz16  
NUC2 1H  
PCPD02 100.00 usec  
PL2 120.00 dB  
PL12 28.00 dB  
SF02 500.1317628 MHz

F2 - Processing parameters

SI 32768  
SF 125.7577959 MHz  
MCM EM  
SSB 0  
LB 1.00 Hz  
GB 0  
PC 1.40

10 NMR plot parameters

CX 20.00 cm  
F1P 200.000 ppm  
F1 25151.56 Hz  
F2P 0.000 ppm  
F2 0.00 Hz

PPMCM 10.000000 ppm/cm  
HZCM 1257.57800 Hz/cm

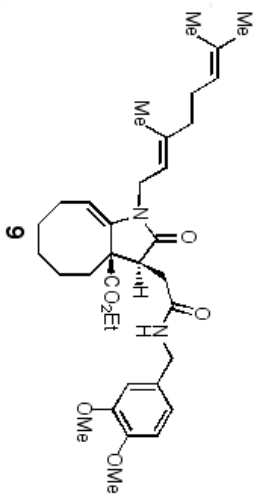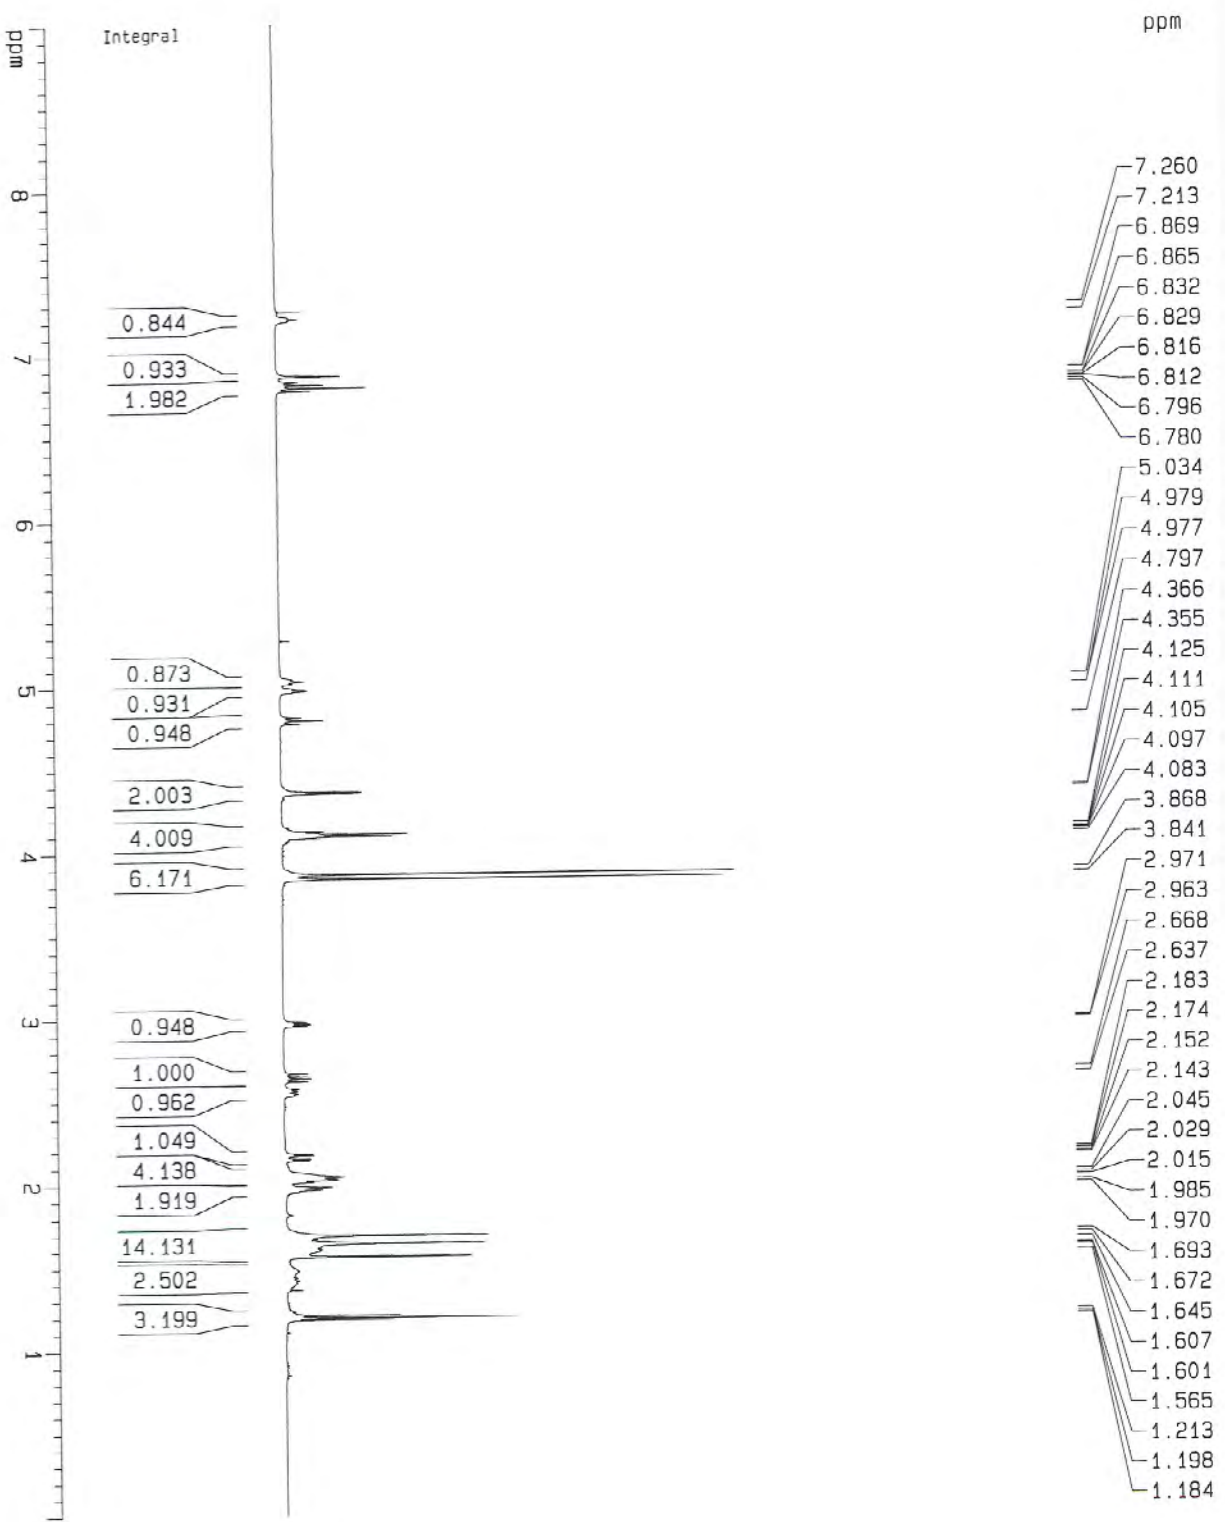

Current Data Parameters  
 NAME A4B2C7  
 EXPNO 1  
 PROCNO 1

F2 - Acquisition Parameters  
 Date\_ 20051027  
 Time 13.04  
 INSTRUM spect  
 PROBHD 5 mm Multinu  
 PULPROG z9  
 TD 32768  
 SOLVENT CDCl3  
 NS 4  
 DS 0  
 SMH 7507.507 Hz  
 FIDRES 0.229111 Hz  
 AQ 2.1823988 sec  
 RB 18  
 DW 65.600 usec  
 DE 4.50 usec  
 TE 300.0 K  
 D1 3.00000000 sec

CHANNEL f1  
 NUC1 1H  
 P1 5.60 usec  
 PL1 0.00 dB  
 SFO1 500.1322000 MHz

F2 - Processing parameters  
 SI 16384  
 SF 500.1300138 MHz  
 KW EM  
 SSB 0  
 LB 0.30 Hz  
 GB 0  
 PC 1.00

1D NMR plot parameters  
 CX 20.00 cm  
 F1P 9.000 ppm  
 F1 4501.17 Hz  
 F2P 0.000 ppm  
 F2 0.00 Hz  
 PPMCM 0.45000 ppm/cm  
 HZCM 225.05850 Hz/cm



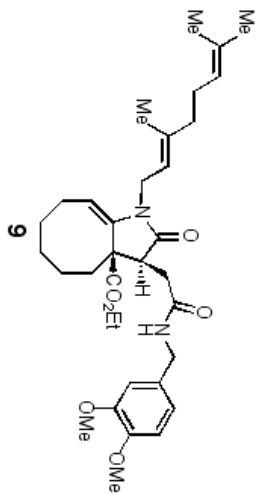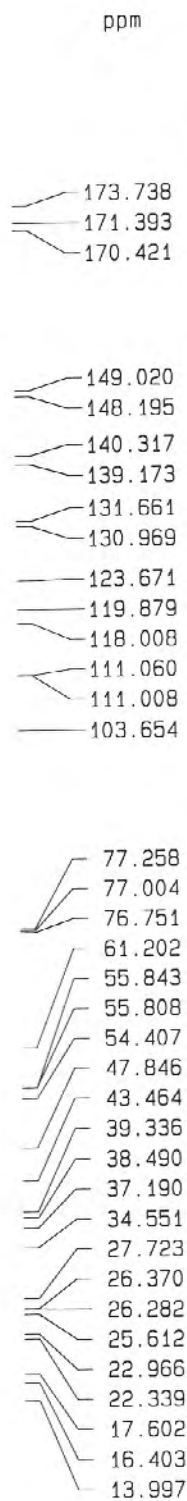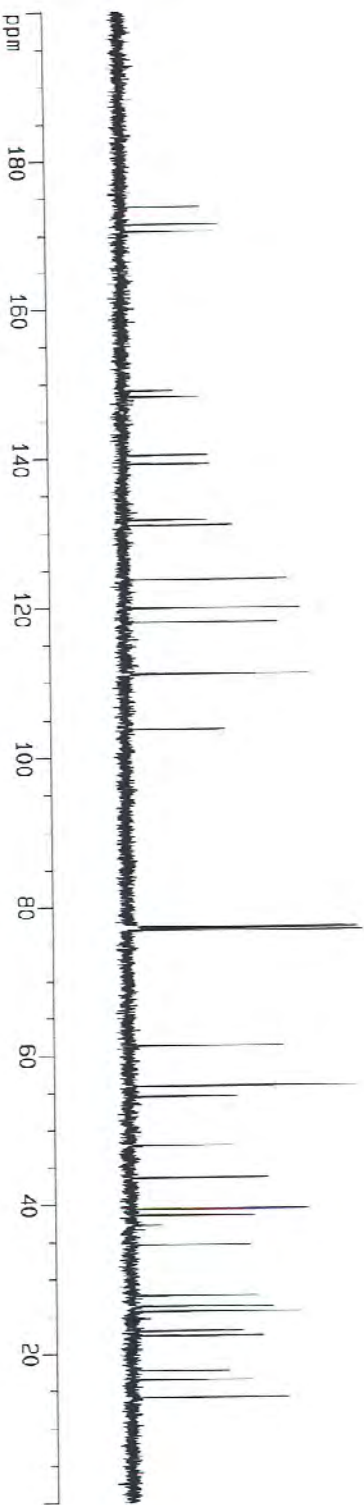

Current Data Parameters  
 NAME A432C7  
 EXPNO 2  
 PROCNO 1

F2 - Acquisition Parameters  
 Date\_ 20061027  
 Time 13.08  
 INSTRUM spect  
 PROBHD 5 mm MUltiNu  
 PULPROG zgpg  
 TD 211264  
 SOLVENT CDCl3  
 NS 111  
 DS 1

SMH 35211.270 Hz  
 FIDRES 0.166670 Hz  
 AQ 2.9999988 sec  
 RG 9195.2  
 DM 14.200 usec  
 DE 4.50 usec  
 TE 300.0 K  
 D1 3.00000000 sec  
 d11 0.03000000 sec

===== CHANNEL f1 =====  
 NU1 13C  
 P1 10.50 usec  
 PL1 -3.00 dB  
 SFO1 125.7735214 MHz

===== CHANNEL f2 =====  
 CPDPRG2 waltz16  
 NU2 1H  
 PCPD2 100.00 usec  
 PL2 120.00 dB  
 PL12 26.00 dB  
 SFO2 500.1317628 MHz

F2 - Processing parameters  
 SI 32768  
 SF 125.7577980 MHz  
 WDW EM  
 SSB 0  
 LB 1.00 Hz  
 GB 0  
 PC 1.40

1D NMR plot parameters  
 CX 20.00 cm  
 F1p 200.000 ppm  
 F1 25151.56 Hz  
 F2p 0.000 ppm  
 F2 0.00 Hz  
 PPMCM 10.00000 ppm/cm  
 HZCM 1257.57800 Hz/cm

55°C

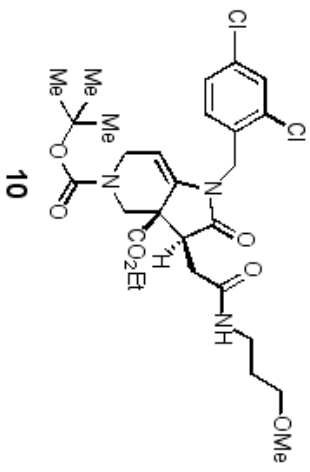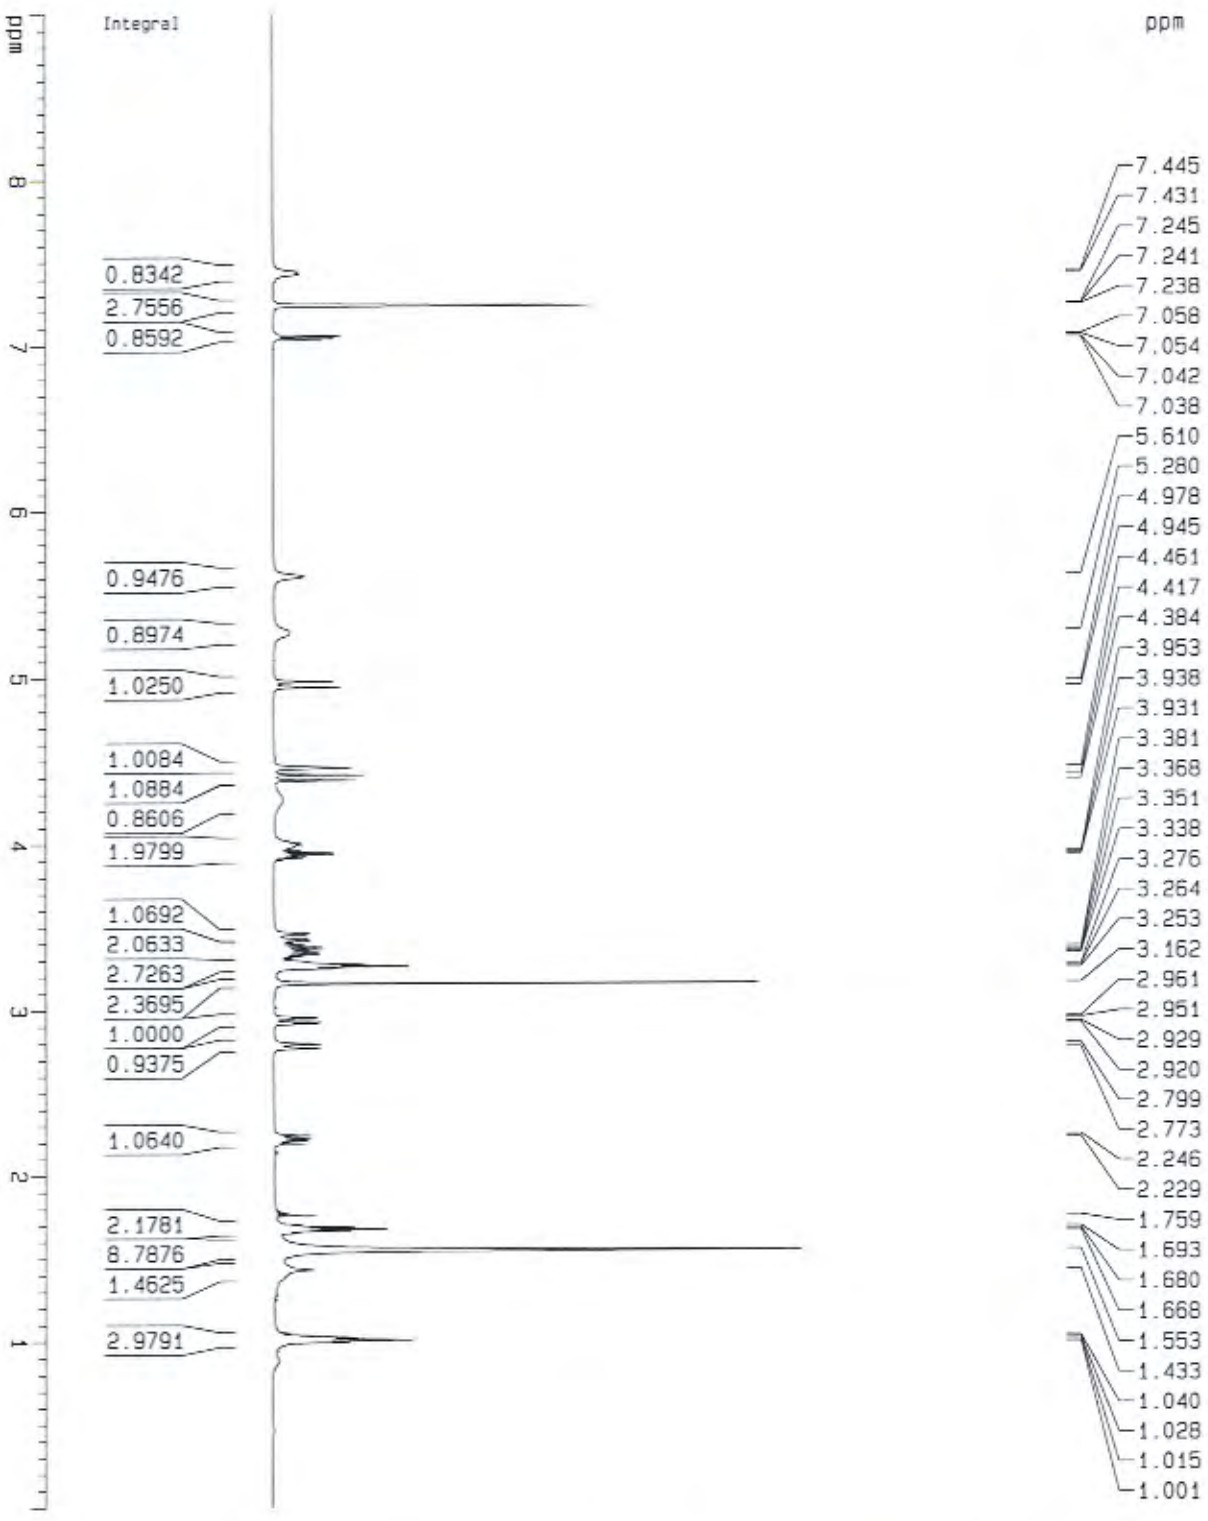

Current Data Parameters

NAME ASBRC3

EXPNO 4

PROCNO 1

F2 - Acquisition Parameters

Date\_ 20051105

Time 21.17

INSTRUM spect

PROBHD 5 mm BNP 1H

PULPROG zg

TD 32768

SOLVENT CDCl3

NS 4

DS 0

SWH 5208.333 Hz

FIDRES 0.158546 Hz

AQ 3.145779 sec

RG 32

DM 96.000 usec

DE 4.50 usec

TE 300.0 K

D1 2.00000000 sec

\*\*\*\*\* CHANNEL f1 \*\*\*\*\*

NUC1 1H

P1 10.00 usec

PL1 -1.00 dB

SFO1 500.1320118 MHz

F2 - Processing parameters

SI 16384

SF 500.1300181 MHz

WDW EM

SSB 0

LB 0.30 Hz

GB 0

PC 1.00

10 NMR plot parameters

CX 20.00 cm

F1P 9.000 ppm

F1 4501.17 Hz

F2P 0.000 ppm

F2 0.00 Hz

PPMCK 0.45000 ppm/cm

HZCK 225.05850 Hz/cm

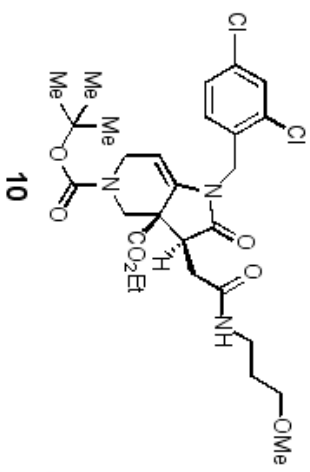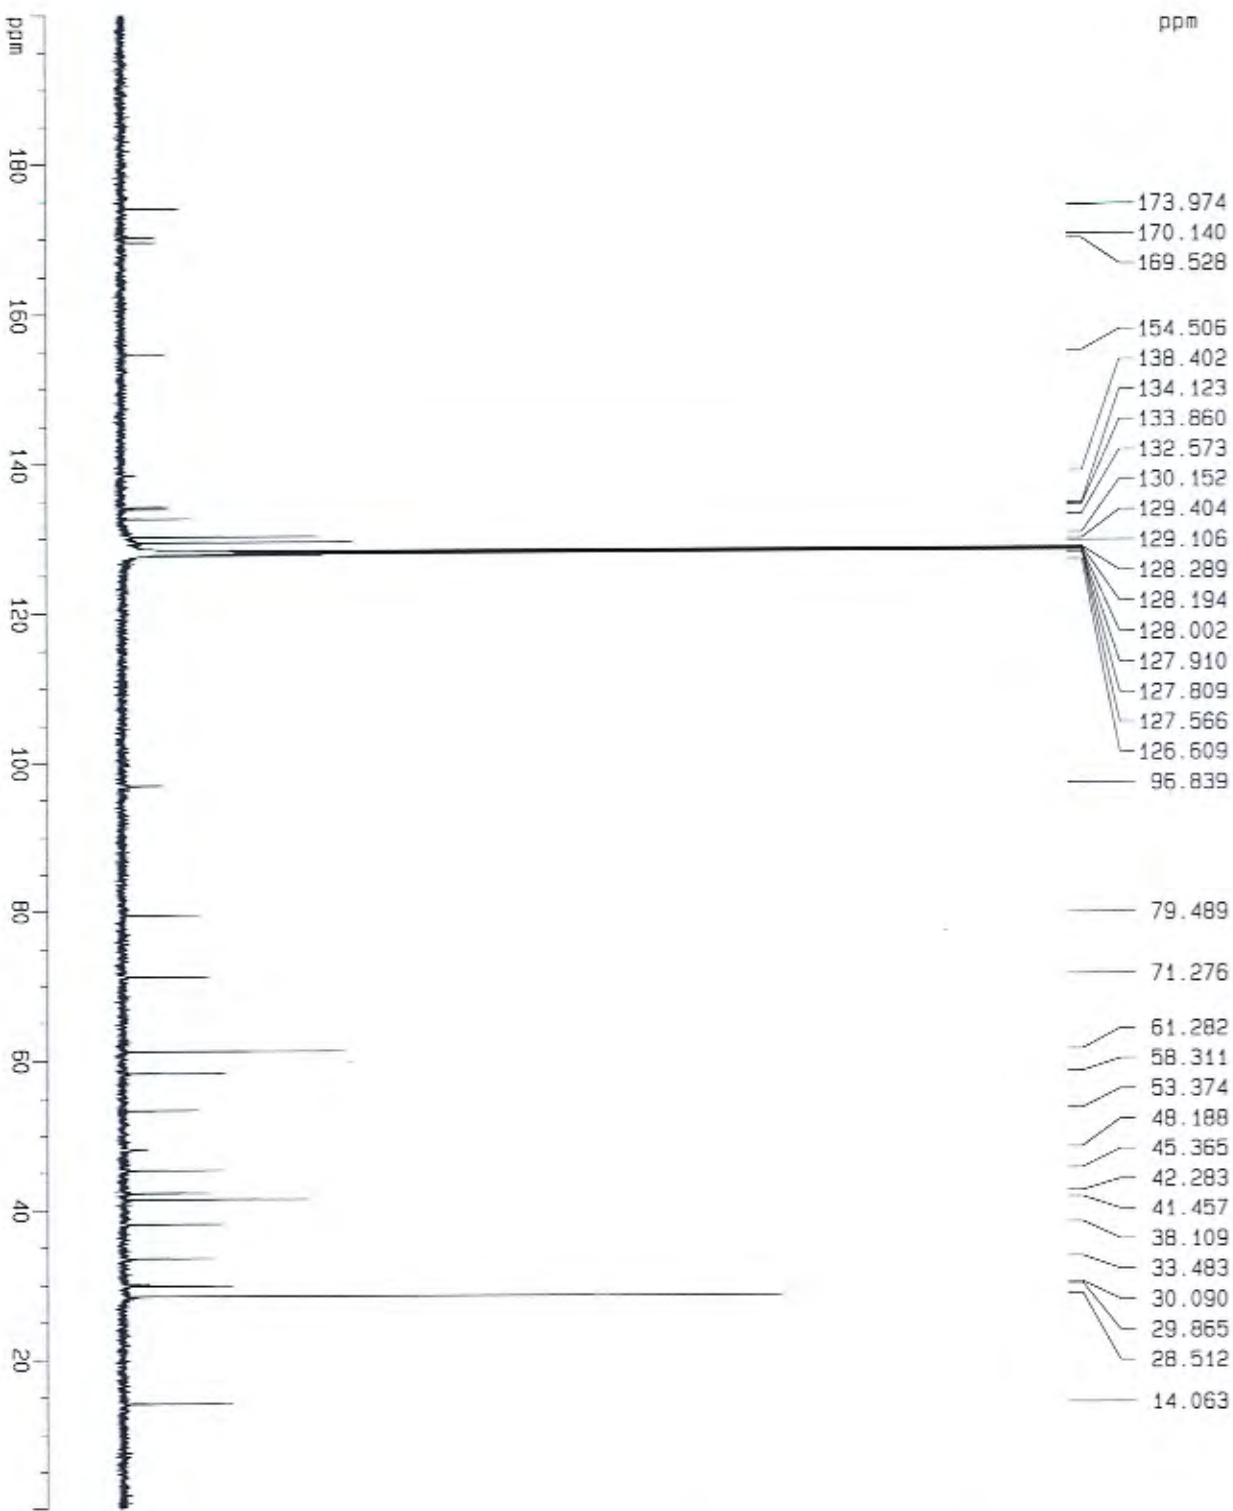

Current Data Parameters  
 NAME A586C3  
 EXPNO 7  
 PROCNO 1

F2 - Acquisition Parameters  
 Date\_ 20061105  
 Time 21.24  
 INSTRUM spect  
 PROBRD 5 mm BNP 1H  
 PULPROG zgpg  
 TD 112720  
 SOLVENT CDCl3  
 NS 345  
 DS 0  
 SWH 31446.541 Hz  
 FIDRES 0.278631 Hz  
 AQ 1.7932520 sec  
 RG 4096  
 DW 15.900 usec  
 DE 7.50 usec  
 TE 300.0 K  
 D1 4.00000000 sec  
 D11 0.03000000 sec

\*\*\*\*\* CHANNEL f1 \*\*\*\*\*  
 NUC1 13C  
 P1 0.00 usec  
 PL1 3.00 dB  
 SF01 125.7720299 MHz

\*\*\*\*\* CHANNEL f2 \*\*\*\*\*  
 CPDPRG2 waltz16  
 NUC2 1H  
 PCPD2 90.00 usec  
 PL2 120.00 dB  
 SF02 500.1389000 MHz

F2 - Processing Parameters  
 SI 32768  
 SF 125.7577483 MHz  
 NDM EM  
 SSB 0  
 LB 1.00 Hz  
 GB 0  
 PC 1.40

1D NMR plot parameters  
 CX 20.00 cm  
 F1P 200.000 ppm  
 F1 25151.55 Hz  
 F2P 0.000 ppm  
 F2 0.00 Hz  
 PPGCM 10.00000 ppm/cm  
 HZCM 1257.57751 Hz/cm

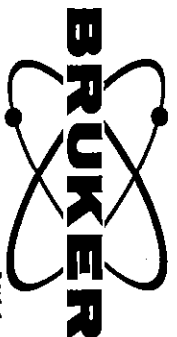

- 8.038
- 8.021
- 7.888
- 7.873
- 7.771
- 7.755
- 7.559
- 7.528
- 7.526
- 7.512
- 7.494
- 7.492
- 7.490
- 7.414
- 7.399
- 7.383
- 7.260
- 7.257
- 7.243
- 7.051
- 7.050
- 7.044
- 6.500
- 6.496
- 6.492
- 6.489
- 5.230
- 5.213
- 4.700
- 4.187
- 4.173
- 4.141
- 4.127
- 3.873
- 3.479
- 3.473
- 3.003
- 2.994
- 2.566
- 1.276
- 1.262
- 1.248

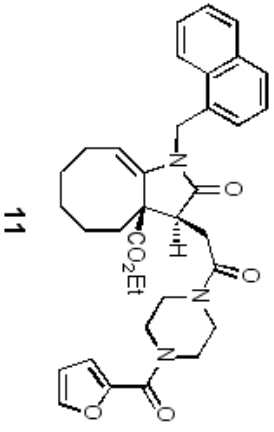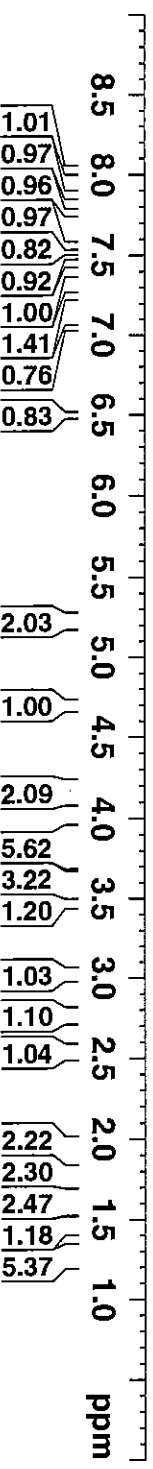

```

NAME          P9E11
EXPNO         1
PROCNO        1
Date_         20100430
Time          6.58
INSTRUM       spect
PROBHD        5 mm PABBI 1H/
PULPROG       zg
TD            59998
SOLVENT       CDCl3
NS            4
DS            0
SWH           10000.000 Hz
FIDRES       0.166672 Hz
AQ           2.9999499 sec
RG           57
DE           50.000 usec
TE           308.1 K
D1           1.00000000 sec
TD0          1
  
```

```

===== CHANNEL f1 =====
NUC1          1H
P1            5.35 usec
PL1           0.00 dB
SFO1         499.8729992 MHz
SI           32768
SF           499.8700173 MHz
WDW           EM
SSB           0
LB           0.30 Hz
GB           0
PC           1.00
  
```

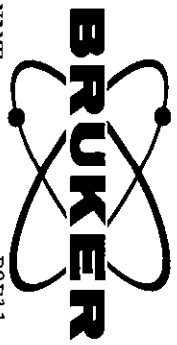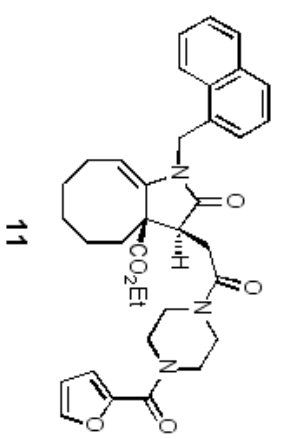

- 174.30
- 172.12
- 169.11
- 159.20
- 143.97
- 141.08
- 133.72
- 130.79
- 130.01
- 128.88
- 127.76
- 126.26
- 125.75
- 125.21
- 123.15
- 122.56
- 117.16
- 111.48
- 104.01
- 77.25
- 77.00
- 76.74
- 61.22
- 54.14
- 48.73
- 42.12
- 31.62
- 27.90
- 25.68
- 22.90
- 22.81
- 14.11

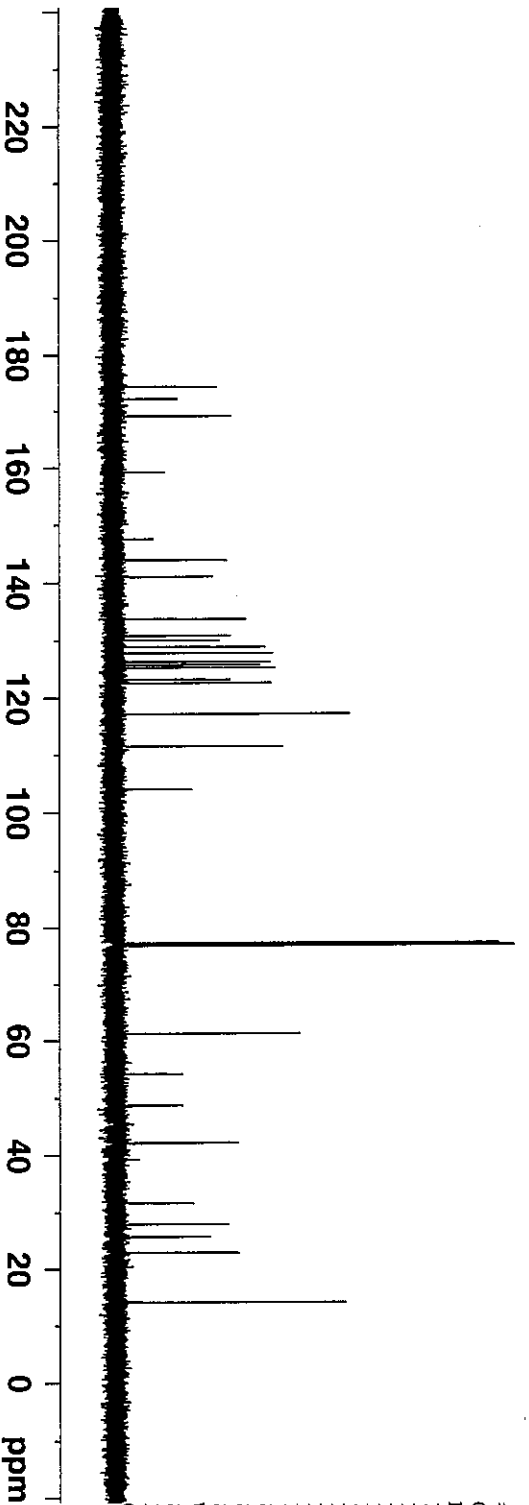

```

NAME          P9E11
EXPNO         2
PROCNO        1
Date_         20080420
Time         16.11
INSTRUM       spect
PROBHD        5 mm PAQNP 1H/
PULPROG       zgpg
TD            197364
SOLVENT       CDCl3
NS            149
DS            4
SWH           32894.738 Hz
FIDRES       0.166670 Hz
AQ           2.9999828 sec
RG           2050
DE           15.200 usec
TE           296.7 K
D1           3.00000000 sec
D11          0.03000000 sec
TD0          1
  
```

```

===== CHANNEL F1 =====
NUC1          13C
P1            8.00 usec
PL1           1.00 dB
PL1W          72.42802429 W
SFO1         125.7716224 MHz
  
```

```

===== CHANNEL F2 =====
CPDPRG2      waltz16
NUC2          1H
PCPD2        80.00 usec
PL2           0.00 dB
PL12         16.50 dB
PL13         17.00 dB
PL2W         24.54113007 W
PL12W        0.54940748 W
PL13W        0.48965994 W
SFO2         500.1325006 MHz
SI           131072
SF           125.7577927 MHz
WDW          EM
SSB          0
LB           0.30 Hz
GB           0
PC           1.40
  
```

323K

ppm  
 8.094  
 8.077  
 7.937  
 7.921  
 7.844  
 7.828  
 7.540  
 7.524  
 7.511  
 7.499  
 7.484  
 7.469  
 6.871  
 6.867  
 6.864  
 6.855  
 6.778  
 6.774  
 5.164  
 4.782  
 4.771  
 4.758  
 4.039  
 3.764  
 3.759  
 3.747  
 3.745  
 3.726  
 3.721  
 3.084  
 2.731  
 2.722  
 2.698  
 2.689  
 2.497  
 2.494  
 2.490  
 2.486  
 2.483  
 1.981  
 1.977  
 1.467  
 1.447  
 1.443  
 1.429  
 1.096  
 1.082  
 1.068

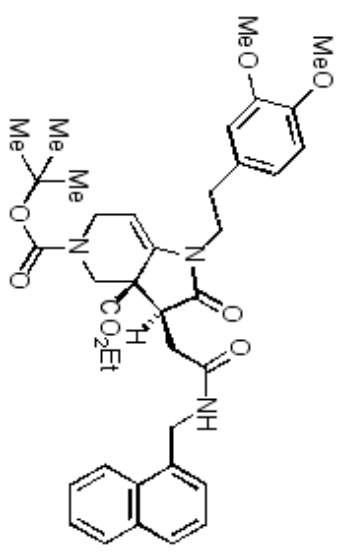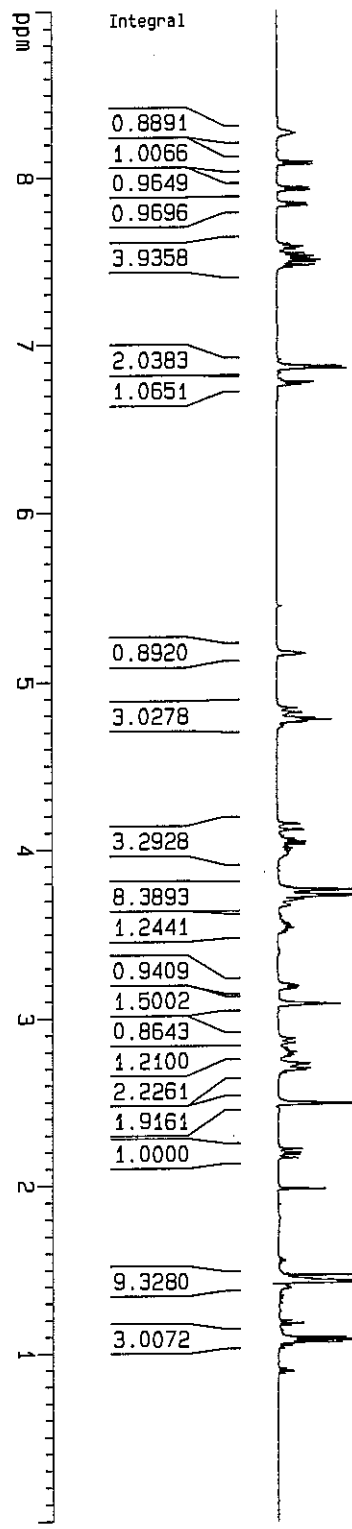

Current Data Parameters  
 NAME P10H6  
 EXPNO 1  
 PROCNO 1

F2 - Acquisition Parameters  
 Date\_ 20100509  
 Time 15.28

INSTRUM spect  
 PROBHD 5 mm QNP 1H  
 PULPROG zg  
 TD 48076  
 SOLVENT DMSO  
 NS 4  
 DS 0

SMH 8012.820 HZ  
 F10RES 0.166670 HZ  
 AQ 2.9999924 sec  
 RG 128  
 DM 62.400 usec  
 DE 4.50 usec  
 TE 300.0 K  
 D1 3.00000000 sec

==== CHANNEL f1 =====  
 NUC1 1H  
 P1 9.00 usec  
 PL1 0.00 dB  
 SF01 500.1325006 MHz

F2 - Processing parameters  
 SI 65536  
 SF 500.1300104 MHz  
 NDM EM  
 SSB 0  
 LB 0.30 HZ  
 BB 0  
 PC 1.00

1D NMR plot parameters  
 CX 20.00 cm  
 F1P 9.000 ppm  
 F1 4501.17 Hz  
 F2P 0.000 ppm  
 F2 0.00 Hz  
 PPGCM 0.45000 ppm/cm  
 HZCM 225.05850 Hz/cm

- 173.21
- 169.76
- 169.69
- 154.29
- 149.46
- 148.15
- 138.34
- 134.79
- 133.75
- 131.78
- 131.41
- 128.79
- 127.88
- 126.59
- 126.05
- 126.02
- 125.75
- 123.85
- 121.14
- 113.68
- 113.10
- 95.96
- 79.27
- 61.18
- 56.27
- 56.18
- 52.63
- 44.19
- 44.13
- 41.64
- 40.90
- 40.69
- 40.62
- 40.53
- 40.36
- 40.19
- 40.03
- 39.86
- 39.69
- 32.34
- 32.16
- 28.46
- 28.37
- 28.13
- 14.14

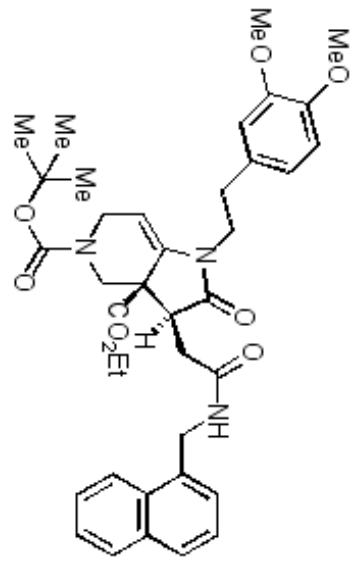

12

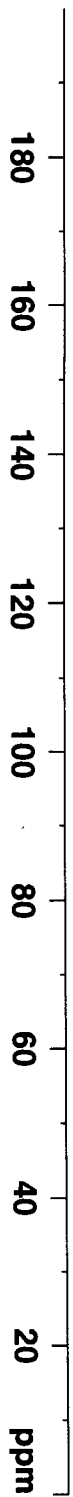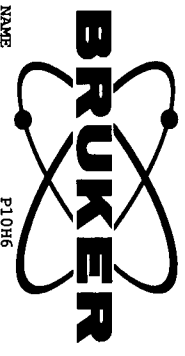

```

NAME P10H6
EXPNO 6
PROCNO 1
Date_ 20100608
Time 21.18
INSTRUM spect
PROBHD 5 mm QNP zgc
PULPROG zgpg30
TD 112780
F2 122780
SOLVENT CDCl3
NS 800
DS 0
SWH 31446.541 Hz
FIDRES 0.278831 Hz
AQ 1.7932520 sec
RG 4096
DE 15.900 usec
TE 7.50 usec
D1 3.0000000 sec
d11 0.03000000 sec

===== CHANNEL f1 =====
NUC1 13C
P1 8.00 usec
PL1 3.00 dB
SFO1 125.7703148 MHz

===== CHANNEL f2 =====
CPDPRG2 waltz16
NUC2 1H
PCPD2 90.00 usec
PL2 120.00 dB
PL12 20.00 dB
SFO2 500.1338000 MHz
SI 32768
SF 125.7578019 MHz
WDW EM
SSB 0
LB 1.00 Hz
GB 0
PC 1.40

```
